# Supplementary material for: A quantitative topological descriptor for linear co-oligomer fusion
Source: Royal Society of Chemistry journal article supplement (doi:10.1039/c8cc03156h), 2018-01-01
Supplement: c8cc03156h1.pdf [file c8cc03156h1.pdf]

## Electronic Supplementary Information

### Quantitative Topological Descriptor for Linear Co-oligomers Fusion

Igor P. Koskin, Evgeny A. Mostovich, Enrico Benassi and Maxim S. Kazantsev

| <b>CONTENT:</b>                                                              | <b>page</b> |
|------------------------------------------------------------------------------|-------------|
| 1. Computational details .....                                               | 2           |
| 2. General description and summary of computational results .....            | 3           |
| 3. Summary of correlations with F-index .....                                | 12          |
| 3.1 Values of Adj-R <sup>2</sup> for linear regressions .....                | 12          |
| 3.2 Intercepts and slopes obtained for linear regressions .....              | 17          |
| 4. Graphical representation of correlations with F-index.....                | 25          |
| 5. Atomic coordinates of optimised structures of investigated compounds..... | 48          |
| 5.1 Neutral ground state .....                                               | 48          |
| 5.2 Cationic ground state .....                                              | 64          |
| 5.3 Anionic ground state .....                                               | 80          |
| 4. S <sub>1</sub> ground state .....                                         | 96          |
| 6. References.....                                                           | 111         |

## 1. Computational details

On the basis of our previous findings,<sup>1</sup> the ground state geometries of neutral and single charged states (cation, anion) were fully optimised at Density Functional Theory (DFT) level, using B3LYP<sup>2</sup> hybrid functional coupled with 6-311++G\*\*<sup>3,4</sup> basis set including GD3BJ<sup>5</sup> empirical dispersion. The presence of imaginary frequencies was checked in harmonic approximation for all optimised geometries and minima of the potential energy surface were found to be “genuine”. The enthalpies and Gibbs energies of formations were calculated for all investigated compounds alongside with the frequency calculations. Ionisation potential (I) of investigated compounds was evaluated as the difference between single-point energy (SPE) of optimised cationic form and neutral forms. Electron affinity of investigated compounds was evaluated as the difference between SPE of optimised anionic and neutral forms.

To explore vertical excited states, nature and energies of first 10 singlet and triplet states were evaluated at Time-Dependent Density Functional Theory (TD-TDF) within the framework of Tamm-Dancoff approximation (TDA)<sup>6</sup> employing PBE0<sup>7</sup>/6-311++G\*\* level of theory. According to our previous investigation,<sup>1</sup> this level of theory was shown to give best agreement with experimental data for 5Oa and 5Sa systems. The geometries of first singlet excited state  $S_1$  were optimised at TD(A)-DFT PBE0/6-311++G\*\* level of theory.

The reorganisation energies for hole ( $\lambda_h$ ) and electron ( $\lambda_e$ ) transfer were calculated from potential energy surfaces (equation 1 and 2)<sup>8</sup> at DFT B3LYP[GD3BJ]/6-311++G\*\* level of theory and refined integration grid (*vide postea*).

$$\lambda_h = \left( E_{neutral(eq)}^+ - E_{neutral(eq)}^0 \right) + \left( E_{cation(eq)}^0 - E_{cation(eq)}^+ \right) \quad (1)$$

$$\lambda_e = \left( E_{neutral(eq)}^- - E_{neutral(eq)}^0 \right) + \left( E_{anion(eq)}^0 - E_{anion(eq)}^- \right) \quad (2)$$

Exciton couplings were evaluated for model, “sandwich-like” co-facial  $\pi$ -dimers as the half of  $T_1$  vertical excitation energy calculated at TD(A)-DFT PBE0/6-311++G\*\* level of theory. Distance between mass centres of the molecules in the dimer was set to 3.5, 4.0 and 4.5 Å.

The first polarisability (both static and frequency dependent) of investigated compounds was evaluated using long-range corrected CAM-B3LYP<sup>9</sup> coupled with 6-31+G\*\*<sup>10</sup> basis set (this level of theory was previously shown to have the best agreement with experimental data).<sup>11</sup> The dynamic properties have been evaluated at the working frequencies of common laser sources, *viz.*  $\omega = 0.6502$  eV ( $\lambda = 1907$  nm), 0.6561 eV ( $\lambda = 1890$  nm), 0.9051 eV ( $\lambda = 1370$  nm), 1.1698 eV ( $\lambda = 1064$  nm), 1.3626 eV ( $\lambda = 910$  nm), and 1.4940 eV ( $\lambda = 830$  nm).

Integration grid for the SPE calculations required for reorganisation energy evaluation was set to 150 radial shells and 974 angular points. In other cases, integration grid was set as 99 radial shells and 590 angular points. Convergence criteria of Self-Consistent Field were set to  $10^{-10}$  for root mean square (RMS) change in density matrix and  $10^{-8}$  for maximum change in density matrix. Convergence criteria for optimisations of neutral, cationic and anionic ground states in the gas phase were set to  $2 \times 10^{-6}$  a.u. for maximum force,  $1 \times 10^{-6}$  a.u. for RMS force,  $6 \times 10^{-6}$  a.u. for maximum displacement and  $4 \times 10^{-6}$  a.u. for RMS displacement; for optimisation of  $S_1$  excited state, convergence criteria for optimisations were set to  $4.5 \times 10^{-4}$  a.u. for maximum force,  $3.0 \times 10^{-4}$  a.u. for RMS force,  $1.8 \times 10^{-3}$  a.u. for maximum displacement and  $1.2 \times 10^{-3}$  a.u. for RMS displacement.

All calculations were performed using GAUSSIAN G09.D01 package.<sup>12</sup>

## 2. General description and summary of computational results

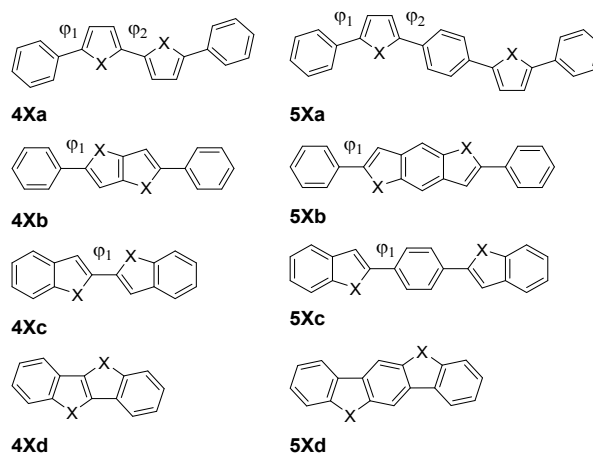

**Chart S1.** Chemical formula of investigated compounds and dihedral angles designation.

The geometries of studied molecules (Chart S1) were optimised at DFT level of theory and found to be planar for all furan-containing systems while thiophene-containing ones have distorted geometry for both annulated and non-annulated compounds (Table S1; see part 5 for optimised geometries coordinates). This difference is ascribed to the more efficient conjugation and hence higher torsional rigidity of furan compounds as compared with their thiophene analogues.<sup>1</sup> Bond length alternation of investigated compounds was found to be lower for furan-containing compounds, which is also a sign of more efficient conjugation (Table S1). The geometries of single charged cations of investigated compounds were also optimised at DFT level of theory and found to be planar for all systems except thiophene/phenylenes which remain to be slightly distorted.

**Table S1.** Values of dihedral angles ( $\varphi_1$ ;  $\varphi_2$ ) and bond length alternation (BLA) of investigated compounds optimised geometries in neutral and charged states.

|     | $\varphi_1/\varphi_2$ (degs) |          |         | BLA (Å) |          |         |
|-----|------------------------------|----------|---------|---------|----------|---------|
|     | neutral                      | cationic | anionic | neutral | cationic | anionic |
| 4Oa | 0/0                          | 0/0      | 0/0     | 0.060   | 0.038    | 0.023   |
| 4Ob | 0                            | 0        | 0       | 0.054   | 0.027    | 0.020   |
| 4Oc | 0                            | 0        | 0       | 0.047   | 0.02     | 0.015   |
| 4Sa | 27/18                        | 11/2     | 0/0     | 0.072   | 0.058    | 0.049   |
| 4Sb | 28                           | 0        | 0       | 0.069   | 0.040    | 0.025   |
| 4Sc | 13                           | 0        | 0       | 0.050   | 0.038    | 0.018   |
| 5Oa | 0/0                          | 0/0      | 0/0     | 0.064   | 0.038    | 0.041   |
| 5Ob | 0                            | 0        | 0       | 0.063   | 0.038    | 0.038   |
| 5Oc | 0                            | 0        | 0       | 0.046   | 0.026    | 0.028   |
| 5Sa | 27/24                        | 0/0      | 16/1    | 0.076   | 0.043    | 0.043   |
| 5Sb | 27                           | 14       | 0       | 0.074   | 0.042    | 0.040   |
| 5Sc | 26                           | 0        | 0       | 0.057   | 0.044    | 0.038   |

Single point energies of investigated compounds in all forms (Table S2) were calculated alongside with the geometry optimisation and found to decrease upon the increase of annulation degree due to lower amount of electrons in annulated compounds.

**Table S2.** Single-point energy of investigated systems (hartree).

|     | Furans (X=O) |           |           | Thiophenes (X=S) |           |           |
|-----|--------------|-----------|-----------|------------------|-----------|-----------|
|     | neutral      | cation    | anion     | neutral          | cation    | anion     |
| 4Xa | -921.299     | -921.062  | -921.325  | -1567.269        | -1567.029 | -1567.307 |
| 4Xb | -843.831     | -843.588  | -843.856  | -1489.824        | -1489.576 | -1489.855 |
| 4Xc | -766.418     | -766.158  | -766.441  | -1412.394        | -1412.111 | -1412.423 |
| 4Xd | -688.954     | -688.686  | -688.962  | -1334.953        | -1334.686 | -1334.965 |
| 5Xa | -1152.441    | -1152.210 | -1152.477 | -1798.407        | -1798.173 | -1798.451 |
| 5Xb | -997.558     | -997.315  | -997.589  | -1643.530        | -1643.284 | -1643.566 |
| 5Xc | -997.560     | -997.312  | -997.597  | -1643.532        | -1643.282 | -1643.572 |
| 5Xd | -842.683     | -842.412  | -842.704  | -1488.660        | -1488.396 | -1488.683 |

Electron gaps between frontier molecular orbitals (HOMO, LUMO,  $E_g$ ) were found to increase (Table S3) which is a consequence of a fewer number of  $\pi$ -electrons in annulated compounds. Energies of the HOMO of investigated compounds were found to decrease with the increase of annulation degree. No monotonic trend is observed in the case of LUMO energy.

**Table S3.** Energy of frontier molecular orbitals (HOMO, LUMO) and electron gap ( $E_g$ ) of investigated compounds (eV)

|     | Furans (X=O) |        |       | Thiophenes (X=S) |        |       |
|-----|--------------|--------|-------|------------------|--------|-------|
|     | HOMO         | LUMO   | $E_g$ | HOMO             | LUMO   | $E_g$ |
| 4Xa | -5.241       | -1.816 | 3.425 | -5.436           | -2.028 | 3.408 |
| 4Xb | -5.323       | -1.826 | 3.497 | -5.594           | -1.832 | 3.761 |
| 4Xc | -5.774       | -1.847 | 3.927 | -5.848           | -1.984 | 3.864 |
| 4Xd | -5.872       | -1.542 | 4.331 | -5.863           | -1.634 | 4.229 |
| 5Xa | -5.224       | -1.986 | 3.238 | -5.466           | -2.057 | 3.409 |
| 5Xb | -5.460       | -1.931 | 3.529 | -5.552           | -1.940 | 3.612 |
| 5Xc | -5.632       | -2.097 | 3.535 | -5.776           | -2.043 | 3.733 |
| 5Xd | -6.058       | -1.842 | 4.216 | -5.835           | -1.828 | 4.006 |

The increase is observed for ionisation potential ( $I_p$ ) of 4O, 5O, 4S compounds and for electron affinity ( $E_a$ ) of 4O, 4S compounds (Table S4), however no monotonic trends are observed for other compounds.

**Table S4.** Ionisation potential ( $I_p$ ) and electron affinity ( $E_a$ ) of investigated compounds (eV)

|     | Furans (X=O) |        | Thiophenes (X=S) |        |
|-----|--------------|--------|------------------|--------|
|     | $I_p$        | $E_a$  | $I_p$            | $E_a$  |
| 4Xa | 6.448        | -0.703 | 6.538            | -1.051 |
| 4Xb | 6.605        | -0.679 | 6.759            | -0.836 |
| 4Xc | 7.090        | -0.604 | 7.694            | -0.802 |
| 4Xd | 7.305        | -0.193 | 7.266            | -0.348 |
| 5Xa | 6.280        | -0.972 | 6.407            | -1.196 |
| 5Xb | 6.630        | -0.846 | 6.698            | -0.979 |
| 5Xc | 6.760        | -0.997 | 6.808            | -1.082 |
| 5Xd | 7.360        | -0.586 | 7.185            | -0.624 |

The enthalpy ( $\Delta H_f$ ) and Gibbs energy ( $\Delta G_f$ ) of formation were evaluated for all investigated compounds at  $T = 298.15$  K and  $p = 1.00$  atm (Tables S5) and found to decrease with the increase of the annulation degree.

**Table S5.** Enthalpy and Gibbs free energy of formation of all investigated compounds calculated at  $T = 298.15$  K and  $p = 1.00$  atm ( $\text{kJ}\cdot\text{mol}^{-1}$ )

|     | Furans (X=O) |              | Thiophenes (X=S) |              |
|-----|--------------|--------------|------------------|--------------|
|     | $\Delta H_f$ | $\Delta G_f$ | $\Delta H_f$     | $\Delta G_f$ |
| 4Xa | -13912       | -12866       | -14399           | -13329       |
| 4Xb | -12474       | -11540       | -13023           | -12064       |
| 4Xc | -11182       | -10357       | -11684           | -10839       |
| 4Xd | -9754        | -9041        | -10314           | -9580        |
| 5Xa | -18031       | -16675       | -18508           | -17125       |
| 5Xb | -15295       | -14158       | -15788           | -14629       |
| 5Xc | -15300       | -14164       | -15793           | -14634       |
| 5Xd | -12575       | -11660       | -13082           | -12148       |



Optical properties investigation of the furan/ and thiophene/phenylenes showed that  $S_0 \rightarrow S_{1v}$  transition retains to be the brightest one for all non-annulated and partially annulated compounds. The nature of this transition retains to be mainly HOMO  $\rightarrow$  LUMO without presence of intermolecular charge transfer for all investigated compounds. On the other hand,  $S_0 \rightarrow S_{1v}$  transition is mostly dark for fully-annulated compound whilst  $S_0 \rightarrow S_{2v}$  is the brightest one. Monotonic increase was observed for both absorption and emission energies (Table S6). Stokes' shifts did not show any dependency from annulation degree.

**Table S6.** Absorption energy (first bright absorption band) and emission energy ( $S_1 \rightarrow S_0$ ) of investigated compounds (eV).

|     | Furans (X=O) |          | Thiophenes (X=S) |          |
|-----|--------------|----------|------------------|----------|
|     | Absorption   | Emission | Absorption       | Emission |
| 4Xa | 3.399        | 3.136    | 3.355            | 2.902    |
| 4Xb | 3.584        | 3.363    | 3.720            | 3.254    |
| 4Xc | 4.022        | 3.748    | 3.754            | 3.528    |
| 4Xd | 4.369        | 4.067    | 4.383            | 3.758    |
| 5Xa | 3.169        | 2.903    | 3.290            | 2.771    |
| 5Xb | 3.549        | 3.271    | 3.533            | 3.147    |
| 5Xc | 3.527        | 3.240    | 3.645            | 3.180    |
| 5Xd | 4.134        | 3.818    | 4.143            | 3.430    |

First static and dynamic (evaluated at the working frequencies of common laser sources) molecular electric polarisabilities (Table S7) were found to increase with the increase of the annulation degree as well as with the increase of excitation frequency.

**Table S7.** First static and dynamic (evaluated for  $\lambda = 1907$  nm, 1370 nm, 1064 nm, 910 nm and 830 nm) molecular electric polarisabilities of investigated compounds ( $10^{-24}$  cm<sup>3</sup>).

|   | 4-ring systems |         |         |           |         |         | 5-ring systems |         |         |           |         |         |
|---|----------------|---------|---------|-----------|---------|---------|----------------|---------|---------|-----------|---------|---------|
|   | Furan          |         |         | Thiophene |         |         | Furan          |         |         | Thiophene |         |         |
|   | Static         | 1907 nm | 1370 nm | Static    | 1907 nm | 1370 nm | Static         | 1907 nm | 1370 nm | Static    | 1907 nm | 1370 nm |
| a | 41.2           | 41.7    | 42.3    | 46.0      | 46.5    | 47.1    | 55.7           | 56.4    | 57.3    | 59.7      | 60.3    | 61.2    |
| b | 37.4           | 37.9    | 38.4    | 40.5      | 40.9    | 41.3    | 45.9           | 46.4    | 47.0    | 50.2      | 50.7    | 51.2    |
| c | 31.6           | 31.9    | 31.9    | 36.2      | 36.5    | 36.9    | 46.0           | 46.6    | 47.2    | 49.7      | 50.2    | 50.7    |
| d | 25.7           | 25.9    | 26.1    | 30.0      | 30.2    | 30.4    | 33.8           | 34.1    | 34.3    | 38.5      | 38.8    | 39.1    |
|   | 1064 nm        | 910 nm  | 830 nm  | 1064 nm   | 910 nm  | 830 nm  | 1064 nm        | 910 nm  | 830 nm  | 1064 nm   | 910 nm  | 830 nm  |
| a | 42.9           | 43.6    | 44.2    | 47.7      | 48.5    | 49.0    | 58.3           | 59.5    | 60.4    | 62.1      | 63.1    | 63.9    |
| b | 39.0           | 39.6    | 40.1    | 41.8      | 42.3    | 42.7    | 47.7           | 48.4    | 49.0    | 51.8      | 52.6    | 53.1    |
| c | 32.6           | 33.0    | 33.3    | 37.3      | 37.7    | 38.1    | 47.9           | 48.6    | 49.2    | 51.3      | 52.0    | 52.5    |
| d | 26.3           | 26.5    | 26.7    | 30.7      | 30.9    | 31.1    | 34.7           | 35.0    | 35.3    | 39.5      | 39.8    | 40.0    |

Exciton coupling of all investigated compounds in model co-facial  $\pi$ -stacking dimers was found to decrease with the increase of the distance between mass-centres of molecules (Table S8).

**Table S8.** Exciton couplings in the model  $\pi$ -stacking dimer (evaluated for distance between mass-centres equal to 3.5 Å; 4.0 Å and 4.5 Å) of investigated compounds (meV).

|   | 4-rings |       |       |           |       |       | 5-rings |       |       |           |       |       |
|---|---------|-------|-------|-----------|-------|-------|---------|-------|-------|-----------|-------|-------|
|   | Furan   |       |       | Thiophene |       |       | Furan   |       |       | Thiophene |       |       |
|   | 3.5 Å   | 4.0 Å | 4.5 Å | 3.5 Å     | 4.0 Å | 4.5 Å | 3.5 Å   | 4.0 Å | 4.5 Å | 3.5 Å     | 4.0 Å | 4.5 Å |
| a | 732     | 863   | 899   | 592       | 739   | 788   | 697     | 851   | 886   | 626       | 778   | 809   |
| b | 769     | 904   | 933   | 732       | 879   | 924   | 802     | 948   | 983   | 807       | 891   | 945   |
| c | 892     | 1029  | 1066  | 917       | 1008  | 1072  | 798     | 967   | 977   | 780       | 910   | 953   |
| d | 1087    | 1224  | 1256  | 1041      | 1201  | 1251  | 1204    | 1341  | 1382  | 1123      | 1308  | 1361  |

Reorganisation energy was evaluated for both hole ( $\lambda_h$ ) and electron ( $\lambda_e$ ) transport for all investigated compounds (Table S9). Both 4 and 5-ringed furan derivatives were found to have higher hole reorganisation energy for fully annulated compounds 4Od and 5Od as compared with their non-annulated analogues 4Oa and 5Oa. On the other hand thiophene-containing compounds demonstrate 1.5 and 3 times lower hole reorganisation energy for 4Sd and 4Sa; 5Sd and 5Sa respectively. Electron reorganisation energy was found to be generally higher for thiophene-containing compounds as compared with their furan analogues, however monotonic trend was found only for 5-ringed thiophene compounds.

**Table S9.** Reorganisation energies for hole ( $\lambda_h$ ) and electron ( $\lambda_e$ ) transfer of investigated compounds (meV)

|     | Furans (X=O) |             | Thiophenes (X=S) |             |
|-----|--------------|-------------|------------------|-------------|
|     | $\lambda_h$  | $\lambda_e$ | $\lambda_h$      | $\lambda_e$ |
| 4Xa | 259          | 269         | 343              | 411         |
| 4Xb | 246          | 297         | 336              | 450         |
| 4Xc | 262          | 315         | 273              | 321         |
| 4Xd | 300          | 267         | 225              | 167         |
| 5Xa | 217          | 226         | 347              | 416         |
| 5Xb | 258          | 229         | 271              | 367         |
| 5Xc | 255          | 269         | 311              | 386         |
| 5Xd | 243          | 197         | 118              | 224         |

### 3. Summary of correlations with F-index

#### 3.1 Values of Adj-R<sup>2</sup> by linear regressions

##### Legend for Tables S10 - S23

The following tables report values of Adj-R<sup>2</sup> for linear regressions of different molecular properties as a function of the F-index variants. Values are classified by the quality of regression: **bold** (excellent: adj-R<sup>2</sup> > 0.9500), underlined (good: 0.9000 ≤ adj-R<sup>2</sup> < 0.9500), *Italics* (decent: 0.8500 ≤ adj-R<sup>2</sup> < 0.9000), plain (poor adj-R<sup>2</sup> < 0.8500).

**Table S10.** Single-point energy in neutral state.

| SPE (neutral form) |                 |                 |                 |                 |
|--------------------|-----------------|-----------------|-----------------|-----------------|
|                    | F <sub>00</sub> | F <sub>01</sub> | F <sub>10</sub> | F <sub>11</sub> |
| <b>4O</b>          | 0.8049          | 0.7001          | <i>0.8800</i>   | <i>0.8715</i>   |
| <b>4S</b>          | 0.8048          | 0.7000          | <i>0.8800</i>   | <i>0.8714</i>   |
| <b>5O</b>          | 0.8216          | 0.8012          | 0.7712          | 0.7995          |
| <b>5S</b>          | 0.8216          | 0.8012          | 0.7712          | 0.7995          |

**Table S11.** Single-point energy in cationic state.

| SPE (cationic form) |                 |                 |                 |                 |
|---------------------|-----------------|-----------------|-----------------|-----------------|
|                     | F <sub>00</sub> | F <sub>01</sub> | F <sub>10</sub> | F <sub>11</sub> |
| <b>4O</b>           | 0.8049          | 0.7001          | <i>0.8800</i>   | <i>0.8715</i>   |
| <b>4S</b>           | 0.8047          | 0.6999          | <i>0.8799</i>   | <i>0.8714</i>   |
| <b>5O</b>           | 0.8216          | 0.8012          | 0.7712          | 0.7995          |
| <b>5S</b>           | 0.8216          | 0.8012          | 0.7712          | 0.7995          |

**Table S12.** Single-point energy in anionic state.

| SPE (anionic form) |                 |                 |                 |                 |
|--------------------|-----------------|-----------------|-----------------|-----------------|
|                    | F <sub>00</sub> | F <sub>01</sub> | F <sub>10</sub> | F <sub>11</sub> |
| <b>4O</b>          | 0.8049          | 0.7002          | <i>0.8800</i>   | <i>0.8715</i>   |
| <b>4S</b>          | 0.8049          | 0.7001          | <i>0.8800</i>   | <i>0.8715</i>   |
| <b>5O</b>          | 0.8216          | 0.8012          | 0.7712          | 0.7995          |
| <b>5S</b>          | 0.8216          | 0.8012          | 0.7712          | 0.7995          |

**Table S13.** Energy of HOMO.

| HOMO      |                 |                 |                 |                 |
|-----------|-----------------|-----------------|-----------------|-----------------|
|           | F <sub>00</sub> | F <sub>01</sub> | F <sub>10</sub> | F <sub>11</sub> |
| <b>4O</b> | 0.5915          | 0.3944          | 0.7384          | 0.6688          |
| <b>4S</b> | 0.4510          | 0.2930          | 0.5932          | 0.5507          |
| <b>5O</b> | 0.8288          | 0.7739          | <i>0.8582</i>   | <i>0.8753</i>   |
| <b>5S</b> | 0.3159          | 0.2342          | 0.3852          | 0.4079          |

**Table S14.** Energy of LUMO.

| LUMO      |                 |                 |                 |                 |
|-----------|-----------------|-----------------|-----------------|-----------------|
|           | F <sub>00</sub> | F <sub>01</sub> | F <sub>10</sub> | F <sub>11</sub> |
| <b>4O</b> | 0.7677          | 0.8251          | 0.6492          | 0.6846          |
| <b>4S</b> | 0.6336          | 0.8109          | 0.4880          | 0.5945          |
| <b>5O</b> | 0.3599          | 0.4377          | 0.2763          | 0.2594          |
| <b>5S</b> | <i>0.8542</i>   | <u>0.9039</u>   | 0.7495          | 0.7558          |

**Table S15.** HOMO-LUMO gap.

| HOMO-LUMO gap |                 |                 |                 |                 |
|---------------|-----------------|-----------------|-----------------|-----------------|
|               | F <sub>00</sub> | F <sub>01</sub> | F <sub>10</sub> | F <sub>11</sub> |
| <b>4O</b>     | <i>0.8800</i>   | 0.7294          | <b>0.9580</b>   | <u>0.9142</u>   |
| <b>4S</b>     | 0.8444          | 0.8220          | <i>0.8580</i>   | <i>0.8930</i>   |
| <b>5O</b>     | <b>0.9786</b>   | <b>0.9546</b>   | <b>0.9760</b>   | <b>0.9851</b>   |
| <b>5S</b>     | 0.7843          | 0.7309          | 0.8003          | 0.8225          |

**Table S16.** Ionisation potential.

| Ionisation potential |                 |                 |                 |                 |
|----------------------|-----------------|-----------------|-----------------|-----------------|
|                      | F <sub>00</sub> | F <sub>01</sub> | F <sub>10</sub> | F <sub>11</sub> |
| <b>4O</b>            | 0.7157          | 0.5433          | 0.8377          | 0.7862          |
| <b>4S</b>            | -0.0807         | -0.2360         | 0.0798          | 0.0110          |
| <b>5O</b>            | <i>0.8878</i>   | 0.8455          | <i>0.8957</i>   | <u>0.9131</u>   |
| <b>5S</b>            | 0.8230          | 0.7785          | 0.8223          | 0.8453          |

**Table S17.** Electron affinity.

| Electron affinity |                 |                 |                 |                 |
|-------------------|-----------------|-----------------|-----------------|-----------------|
|                   | F <sub>00</sub> | F <sub>01</sub> | F <sub>10</sub> | F <sub>11</sub> |
| <b>4O</b>         | <b>0.9653</b>   | <u>0.9414</u>   | <u>0.9170</u>   | <u>0.9274</u>   |
| <b>4S</b>         | <b>0.9663</b>   | <b>0.9805</b>   | <u>0.9237</u>   | <b>0.9671</b>   |
| <b>5O</b>         | <i>0.8883</i>   | <u>0.9259</u>   | 0.8301          | 0.8235          |
| <b>5S</b>         | <b>0.9873</b>   | <b>0.9958</b>   | <u>0.9383</u>   | <u>0.9460</u>   |

**Table S18.** Enthalpy of formation.

| Enthalpy of formation |                 |                 |                 |                 |
|-----------------------|-----------------|-----------------|-----------------|-----------------|
|                       | F <sub>00</sub> | F <sub>01</sub> | F <sub>10</sub> | F <sub>11</sub> |
| <b>4O</b>             | 0.8112          | 0.7089          | <i>0.8812</i>   | <i>0.8745</i>   |
| <b>4S</b>             | 0.8059          | 0.7123          | <i>0.8800</i>   | <i>0.8782</i>   |
| <b>5O</b>             | 0.8205          | 0.8128          | 0.7687          | 0.7809          |
| <b>5S</b>             | 0.8207          | 0.7999          | 0.7803          | 0.8050          |

**Table S19.** Gibbs' free energy of formation.

| Gibbs' free energy of formation |                 |                 |                 |                 |
|---------------------------------|-----------------|-----------------|-----------------|-----------------|
|                                 | F <sub>00</sub> | F <sub>01</sub> | F <sub>10</sub> | F <sub>11</sub> |
| <b>4O</b>                       | 0.8045          | 0.7052          | <i>0.8845</i>   | <i>0.8720</i>   |
| <b>4S</b>                       | 0.8086          | 0.7025          | <i>0.8853</i>   | <i>0.8740</i>   |
| <b>5O</b>                       | 0.8250          | 0.8012          | 0.7756          | 0.7968          |
| <b>5S</b>                       | 0.8210          | 0.8032          | 0.7712          | 0.7912          |

**Table S20.** Absorption and emission energies.

| Transition energy (absorption) |                 |                 |                 |                 |
|--------------------------------|-----------------|-----------------|-----------------|-----------------|
|                                | F <sub>00</sub> | F <sub>01</sub> | F <sub>10</sub> | F <sub>11</sub> |
| <b>4O</b>                      | 0.8332          | 0.6882          | <u>0.9241</u>   | <i>0.8887</i>   |
| <b>4S</b>                      | <u>0.9396</u>   | <b>0.9601</b>   | <u>0.9004</u>   | <u>0.9495</u>   |
| <b>5O</b>                      | <u>0.9476</u>   | <u>0.9293</u>   | <u>0.9175</u>   | <u>0.9348</u>   |
| <b>5S</b>                      | <u>0.9020</u>   | <u>0.8577</u>   | <u>0.9209</u>   | <u>0.9349</u>   |

  

| Transition energy (emission) |                 |                 |                 |                 |
|------------------------------|-----------------|-----------------|-----------------|-----------------|
|                              | F <sub>00</sub> | F <sub>01</sub> | F <sub>10</sub> | F <sub>11</sub> |
| <b>4O</b>                    | 0.8239          | 0.6909          | <u>0.9115</u>   | <i>0.8846</i>   |
| <b>4S</b>                    | 0.7115          | 0.6150          | 0.7931          | 0.7909          |
| <b>5O</b>                    | <u>0.9474</u>   | <u>0.9312</u>   | <u>0.9135</u>   | <u>0.9312</u>   |
| <b>5S</b>                    | 0.6618          | 0.6358          | 0.6070          | 0.6418          |

**Table S21.** First electric polarisability.

|                 | 4-ring systems       |                      |                      |                      |                      |                      | 5-ring systems |               |               |               |               |               |
|-----------------|----------------------|----------------------|----------------------|----------------------|----------------------|----------------------|----------------|---------------|---------------|---------------|---------------|---------------|
|                 | Furan                |                      |                      | Thiophene            |                      |                      | Furan          |               |               | Thiophene     |               |               |
|                 | Static               | 1907 nm              | 1370 nm              | Static               | 1907 nm              | 1370 nm              | Static         | 1907 nm       | 1370 nm       | Static        | 1907 nm       | 1370 nm       |
| F <sub>00</sub> | <i>0.8578</i>        | <i>0.8598</i>        | <i>0.8563</i>        | <i>0.8529</i>        | <i>0.8506</i>        | <i>0.8481</i>        | <i>0.8882</i>  | <i>0.8903</i> | <i>0.8856</i> | <i>0.8632</i> | <i>0.8657</i> | <i>0.8753</i> |
| F <sub>01</sub> | <i>0.7350</i>        | <i>0.7373</i>        | <i>0.7338</i>        | <i>0.7708</i>        | <i>0.7685</i>        | <i>0.7642</i>        | <i>0.8681</i>  | <i>0.8704</i> | <i>0.8712</i> | <i>0.8378</i> | <i>0.8405</i> | <i>0.8485</i> |
| F <sub>10</sub> | <u><i>0.9341</i></u> | <u><i>0.9355</i></u> | <u><i>0.9310</i></u> | <u><i>0.9067</i></u> | <u><i>0.9048</i></u> | <u><i>0.9048</i></u> | <i>0.8476</i>  | <i>0.8476</i> | <i>0.8462</i> | <i>0.8281</i> | <i>0.8281</i> | <i>0.8257</i> |
| F <sub>11</sub> | <u><i>0.9126</i></u> | <u><i>0.9136</i></u> | <u><i>0.9123</i></u> | <u><i>0.9100</i></u> | <u><i>0.9098</i></u> | <u><i>0.9107</i></u> | <i>0.8711</i>  | <i>0.8699</i> | <i>0.8680</i> | <i>0.8529</i> | <i>0.8537</i> | <i>0.8542</i> |
|                 | 1064 nm              | 910 nm               | 830 nm               | 1064 nm              | 910 nm               | 830 nm               | 1064 nm        | 910 nm        | 830 nm        | 1064 nm       | 910 nm        | 830 nm        |
| F <sub>00</sub> | <i>0.8582</i>        | <i>0.8563</i>        | <i>0.8526</i>        | <i>0.8501</i>        | <i>0.8512</i>        | <i>0.8521</i>        | <i>0.8882</i>  | <i>0.8875</i> | <i>0.8854</i> | <i>0.8712</i> | <i>0.8732</i> | <i>0.8729</i> |
| F <sub>01</sub> | <i>0.7348</i>        | <i>0.7317</i>        | <i>0.7328</i>        | <i>0.7624</i>        | <i>0.7662</i>        | <i>0.7646</i>        | <i>0.8732</i>  | <i>0.8724</i> | <i>0.8737</i> | <i>0.8495</i> | <i>0.8475</i> | <i>0.8480</i> |
| F <sub>10</sub> | <u><i>0.9327</i></u> | <u><i>0.9304</i></u> | <u><i>0.9300</i></u> | <u><i>0.9023</i></u> | <u><i>0.9031</i></u> | <u><i>0.9049</i></u> | <i>0.8485</i>  | <i>0.8474</i> | <i>0.8482</i> | <i>0.8241</i> | <i>0.8256</i> | <i>0.8230</i> |
| F <sub>11</sub> | <u><i>0.9136</i></u> | <u><i>0.9128</i></u> | <u><i>0.9137</i></u> | <u><i>0.9112</i></u> | <u><i>0.9109</i></u> | <u><i>0.9112</i></u> | <i>0.8682</i>  | <i>0.8680</i> | <i>0.8696</i> | <i>0.8553</i> | <i>0.8542</i> | <i>0.8555</i> |

**Table S22.** Exciton couplings (at 3.5, 4.0 and 4.5 Å of distance).

|                 | 4-ring systems       |                      |                      |                      |                      |                      | 5-ring systems       |                      |                      |                      |                      |                      |
|-----------------|----------------------|----------------------|----------------------|----------------------|----------------------|----------------------|----------------------|----------------------|----------------------|----------------------|----------------------|----------------------|
|                 | Furan                |                      |                      | Thiophene            |                      |                      | Furan                |                      |                      | Thiophene            |                      |                      |
|                 | 3.5 Å                | 4.0 Å                | 4.5 Å                | 3.5 Å                | 4.0 Å                | 4.5 Å                | 3.5 Å                | 4.0 Å                | 4.5 Å                | 3.5 Å                | 4.0 Å                | 4.5 Å                |
| F <sub>00</sub> | <u><i>0.9454</i></u> | <u><i>0.9468</i></u> | <u><i>0.9474</i></u> | <i>0.8941</i>        | <i>0.8959</i>        | <i>0.8931</i>        | <u><i>0.9432</i></u> | <u><i>0.9412</i></u> | <u><i>0.9414</i></u> | <u><i>0.9007</i></u> | <u><i>0.9016</i></u> | <u><i>0.9032</i></u> |
| F <sub>01</sub> | <i>0.8287</i>        | <i>0.8293</i>        | <i>0.8270</i>        | <i>0.8130</i>        | <i>0.8131</i>        | <i>0.8123</i>        | <u><i>0.9079</i></u> | <u><i>0.9082</i></u> | <u><i>0.9076</i></u> | <i>0.8218</i>        | <i>0.8213</i>        | <i>0.8219</i>        |
| F <sub>10</sub> | <b><i>0.9899</i></b> | <b><i>0.9912</i></b> | <b><i>0.9910</i></b> | <u><i>0.9430</i></u> | <u><i>0.9426</i></u> | <u><i>0.9433</i></u> | <b><i>0.9854</i></b> | <b><i>0.9882</i></b> | <b><i>0.9878</i></b> | <u><i>0.9341</i></u> | <u><i>0.9354</i></u> | <u><i>0.9351</i></u> |
| F <sub>11</sub> | <b><i>0.9601</i></b> | <b><i>0.9641</i></b> | <b><i>0.9637</i></b> | <u><i>0.9432</i></u> | <u><i>0.9438</i></u> | <u><i>0.9434</i></u> | <b><i>0.9822</i></b> | <b><i>0.9819</i></b> | <b><i>0.9809</i></b> | <b><i>0.9957</i></b> | <b><i>0.9975</i></b> | <b><i>0.9931</i></b> |



**Table S23.** Reorganisation energies for hole ( $\lambda_h$ ) and electron ( $\lambda_e$ ) transfer.

|                 | 4-ring systems |             |               |               | 5-ring systems |             |               |               |
|-----------------|----------------|-------------|---------------|---------------|----------------|-------------|---------------|---------------|
|                 | Furan          |             | Thiophene     |               | Furan          |             | Thiophene     |               |
|                 | $\lambda_h$    | $\lambda_e$ | $\lambda_h$   | $\lambda_e$   | $\lambda_h$    | $\lambda_e$ | $\lambda_h$   | $\lambda_e$   |
| F <sub>00</sub> | 0.7792         | -0.3689     | 0.8372        | <i>0.8511</i> | -0.3922        | 0.1737      | <b>0.9928</b> | <b>0.9956</b> |
| F <sub>01</sub> | 0.6898         | -0.3171     | 0.6707        | 0.7012        | -0.3906        | 0.2334      | <b>0.9998</b> | <b>0.9894</b> |
| F <sub>10</sub> | 0.7604         | -0.4313     | <u>0.9304</u> | <u>0.9001</u> | -0.4379        | 0.1418      | <u>0.9562</u> | <b>0.9875</b> |
| F <sub>11</sub> | 0.7242         | -0.4230     | <i>0.8773</i> | 0.8436        | -0.4209        | 0.1143      | <u>0.9594</u> | <b>0.9870</b> |

### 3.2 Intercepts and slopes obtained by linear regressions

The following tables report values of intercepts (Tables S24, S26, S28, S30) and slopes (Tables S25, S27, S29, S31) with respective errors, obtained for different molecular properties of different compounds as a function of the F-index variants by means of the least squares linear regression. Values are classified by the quality of regression: **bold** (excellent:  $\text{adj-R}^2 > 0.9500$ ), underlined (good:  $0.9000 \leq \text{adj-R}^2 < 0.9500$ ), *Italics* (decent:  $0.8500 \leq \text{adj-R}^2 < 0.9000$ ), plain (poor  $\text{adj-R}^2 < 0.8500$ ).

**Table S24.** Intercepts (with errors) for 40-compounds' properties.

|                          | F <sub>00</sub>     | F <sub>01</sub>     | F <sub>10</sub>     | F <sub>11</sub>     |
|--------------------------|---------------------|---------------------|---------------------|---------------------|
| E <sub>SPE</sub> (0)     | -880 ± 30           | -880 ± 40           | -890 ± 20           | -890 ± 30           |
| E <sub>SPE</sub> (+)     | -880 ± 30           | -880 ± 40           | -890 ± 20           | -890 ± 30           |
| E <sub>SPE</sub> (-)     | -880 ± 30           | -880 ± 40           | -890 ± 20           | -890 ± 30           |
| I <sub>p</sub>           | 6.6 ± 0.2           | 6.5 ± 0.2           | 6.5 ± 0.1           | 6.5 ± 0.1           |
| E <sub>a</sub>           | <b>-0.75 ± 0.03</b> | <u>-0.75 ± 0.04</u> | <u>-0.75 ± 0.05</u> | <u>-0.76 ± 0.05</u> |
| E <sub>HOMO</sub>        | -5.3 ± 0.1          | -5.3 ± 0.2          | -5.3 ± 0.1          | -5.3 ± 0.1          |
| E <sub>LUMO</sub>        | -1.87 ± 0.05        | -1.88 ± 0.04        | -1.87 ± 0.06        | -1.86 ± 0.06        |
| E <sub>g</sub>           | 3.4 ± 0.1           | 3.5 ± 0.2           | <b>3.43 ± 0.06</b>  | <u>3.42 ± 0.09</u>  |
| ΔH <sub>f</sub>          | -16000 ± 700        | -16000 ± 900        | -16000 ± 600        | -16200 ± 600        |
| ΔG <sub>f</sub>          | -15000 ± 700        | -15000 ± 800        | -15000 ± 500        | -15000 ± 600        |
| E <sub>Abs</sub>         | 3.5 ± 0.1           | 3.5 ± 0.2           | <u>3.46 ± 0.09</u>  | 3.5 ± 0.1           |
| E <sub>Em</sub>          | 3.2 ± 0.1           | 3.3 ± 0.2           | <u>3.22 ± 0.09</u>  | 3.2 ± 0.1           |
| α(0;0)                   | 40 ± 2              | 39 ± 2              | <u>40 ± 1</u>       | <u>40 ± 1</u>       |
| α(-1907 nm; 1907 nm)     | 40 ± 1              | 39 ± 2              | <u>40 ± 1</u>       | <u>40 ± 2</u>       |
| α(-1370 nm; 1370 nm)     | 40 ± 2              | 40 ± 1              | <u>39 ± 2</u>       | <u>40 ± 1</u>       |
| α(-1064 nm; 1064 nm)     | 40 ± 1              | 39 ± 1              | <u>40 ± 2</u>       | <u>39 ± 1</u>       |
| α(-910 nm; 910 nm)       | 39 ± 2              | 40 ± 2              | <u>40 ± 1</u>       | <u>39 ± 2</u>       |
| α(-830 nm; 830 nm)       | 40 ± 2              | 40 ± 1              | <u>39 ± 2</u>       | <u>40 ± 1</u>       |
| λ <sub>h</sub>           | 248 ± 8             | 248 ± 9             | 248 ± 8             | 247 ± 9             |
| λ <sub>e</sub>           | 290 ± 20            | 290 ± 18            | 290 ± 20            | 290 ± 20            |
| V <sub>exc</sub> (3.5 Å) | <u>830 ± 30</u>     | 720 ± 30            | <b>860 ± 10</b>     | <b>850 ± 30</b>     |
| V <sub>exc</sub> (4.0 Å) | <u>820 ± 30</u>     | 730 ± 40            | <b>870 ± 10</b>     | <b>840 ± 30</b>     |
| V <sub>exc</sub> (4.5 Å) | <u>830 ± 30</u>     | 720 ± 40            | <b>870 ± 10</b>     | <b>850 ± 30</b>     |

**Table S25.** Slopes (with errors) for 4O-compounds' properties.

|                          | F <sub>00</sub>    | F <sub>01</sub>    | F <sub>10</sub>    | F <sub>11</sub>    |
|--------------------------|--------------------|--------------------|--------------------|--------------------|
| E <sub>SPE(0)</sub>      | 35 ± 9             | 50 ± 18            | 31 ± 6             | 40 ± 10            |
| E <sub>SPE(+)</sub>      | 35 ± 9             | 50 ± 18            | 31 ± 6             | 40 ± 10            |
| E <sub>SPE(-)</sub>      | 35 ± 9             | 50 ± 18            | 31 ± 6             | 40 ± 10            |
| I <sub>p</sub>           | 0.14 ± 0.05        | 0.19 ± 0.09        | 0.12 ± 0.03        | 0.17 ± 0.05        |
| E <sub>a</sub>           | <b>0.09 ± 0.01</b> | <u>0.13 ± 0.02</u> | <u>0.07 ± 0.01</u> | <u>0.11 ± 0.02</u> |
| E <sub>HOMO</sub>        | -0.10 ± 0.04       | -0.14 ± 0.08       | -0.09 ± 0.03       | -0.12 ± 0.05       |
| E <sub>LUMO</sub>        | 0.05 ± 0.02        | 0.08 ± 0.02        | 0.04 ± 0.01        | 0.06 ± 0.02        |
| E <sub>g</sub>           | <i>0.15 ± 0.03</i> | 0.22 ± 0.07        | <b>0.13 ± 0.02</b> | <u>0.19 ± 0.03</u> |
| ΔH <sub>f</sub>          | 800 ± 200          | 1200 ± 400         | <i>800 ± 200</i>   | <i>1000 ± 200</i>  |
| ΔG <sub>f</sub>          | 800 ± 200          | 1100 ± 400         | <i>700 ± 100</i>   | <i>1000 ± 200</i>  |
| E <sub>Abs</sub>         | 0.16 ± 0.04        | 0.22 ± 0.08        | <u>0.14 ± 0.02</u> | <i>0.19 ± 0.04</i> |
| E <sub>Em</sub>          | 0.15 ± 0.04        | 0.21 ± 0.08        | <u>0.13 ± 0.02</u> | <i>0.18 ± 0.04</i> |
| α(0;0)                   | -2.4 ± 0.5         | -3 ± 1             | <u>-2.1 ± 0.3</u>  | <u>-3.1 ± 0.5</u>  |
| α(-1907 nm; 1907 nm)     | -2.2 ± 0.3         | -2 ± 1             | <u>-2.0 ± 0.2</u>  | <u>3.2 ± 0.6</u>   |
| α(-1370 nm; 1370 nm)     | -2.5 ± 0.4         | -3 ± 1             | <u>-2.0 ± 0.3</u>  | <u>-3.0 ± 0.4</u>  |
| α(-1064 nm; 1064 nm)     | -2.4 ± 0.4         | -3 ± 1             | <u>-2.1 ± 0.2</u>  | <u>-3.1 ± 0.4</u>  |
| α(-910 nm; 910 nm)       | -2.3 ± 0.3         | -3 ± 1             | <u>-2.2 ± 0.2</u>  | <u>-3.0 ± 0.5</u>  |
| α(-830 nm; 830 nm)       | -2.2 ± 0.4         | -2 ± 1             | <u>-2.1 ± 0.2</u>  | <u>-3.2 ± 0.4</u>  |
| λ <sub>h</sub>           | 8 ± 2              | 11 ± 4             | 7 ± 2              | 10 ± 3             |
| λ <sub>e</sub>           | -3 ± 6             | -5 ± 9             | 2 ± 5              | -2 ± 7             |
| V <sub>exc</sub> (3.5 Å) | <u>61 ± 8</u>      | 90 ± 20            | <b>54 ± 2</b>      | <b>74 ± 7</b>      |
| V <sub>exc</sub> (4.0 Å) | <u>58 ± 7</u>      | 90 ± 20            | <b>55 ± 3</b>      | <b>76 ± 6</b>      |
| V <sub>exc</sub> (4.5 Å) | <u>60 ± 10</u>     | 100 ± 30           | <b>52 ± 3</b>      | <b>73 ± 8</b>      |

**Table S26.** Intercepts (with errors) for 4S-compounds' properties.

|                          | F <sub>00</sub>     | F <sub>01</sub>     | F <sub>10</sub>     | F <sub>11</sub>     |
|--------------------------|---------------------|---------------------|---------------------|---------------------|
| E <sub>SPE(0)</sub>      | -1530 ± 30          | -1530 ± 40          | -1530 ± 40          | -1530 ± 40          |
| E <sub>SPE(+)</sub>      | -1530 ± 30          | -1530 ± 40          | -1530 ± 40          | -1530 ± 40          |
| E <sub>SPE(-)</sub>      | -1530 ± 30          | -1530 ± 40          | -1530 ± 40          | -1530 ± 40          |
| I <sub>p</sub>           | 6.8 ± 0.4           | 6.9 ± 0.4           | 6.7 ± 0.4           | 6.8 ± 0.4           |
| E <sub>a</sub>           | <b>-1.01 ± 0.04</b> | <b>-1.01 ± 0.03</b> | <u>-1.01 ± 0.06</u> | <b>-1.03 ± 0.04</b> |
| E <sub>HOMO</sub>        | -5.5 ± 0.1          | -5.6 ± 0.1          | -5.5 ± 0.1          | -5.5 ± 0.1          |
| E <sub>LUMO</sub>        | -2.00 ± 0.07        | -2.00 ± 0.05        | -2.00 ± 0.09        | 2.00 ± 0.08         |
| E <sub>g</sub>           | 3.5 ± 0.1           | 3.5 ± 0.1           | <u>3.5 ± 0.1</u>    | <u>3.51 ± 0.08</u>  |
| ΔH <sub>f</sub>          | -16000 ± 700        | -16000 ± 900        | -16000 ± 600        | -16000 ± 600        |
| ΔG <sub>f</sub>          | -15000 ± 700        | -15000 ± 800        | -15000 ± 500        | -15600 ± 600        |
| E <sub>Abs</sub>         | <u>3.44 ± 0.07</u>  | <b>3.43 ± 0.06</b>  | <u>3.4 ± 0.1</u>    | <u>3.41 ± 0.07</u>  |
| E <sub>Em</sub>          | 3.1 ± 0.1           | 3.1 ± 0.2           | 3.0 ± 0.1           | 3.0 ± 0.1           |
| α(0;0)                   | 44 ± 2              | 43 ± 2              | <u>44 ± 1</u>       | <u>42 ± 3</u>       |
| α(-1907 nm; 1907 nm)     | 43 ± 2              | 44 ± 2              | <u>42 ± 3</u>       | <u>43 ± 2</u>       |
| α(-1370 nm; 1370 nm)     | 43 ± 2              | 43 ± 2              | <u>44 ± 1</u>       | <u>43 ± 2</u>       |
| α(-1064 nm; 1064 nm)     | 44 ± 1              | 42 ± 3              | <u>44 ± 1</u>       | <u>44 ± 1</u>       |
| α(-910 nm; 910 nm)       | 42 ± 3              | 44 ± 2              | <u>43 ± 2</u>       | <u>42 ± 3</u>       |
| α(-830 nm; 830 nm)       | 44 ± 2              | 43 ± 2              | <u>42 ± 3</u>       | <u>43 ± 2</u>       |
| λ <sub>h</sub>           | 340 ± 20            | 340 ± 20            | <u>340 ± 10</u>     | <u>340 ± 10</u>     |
| λ <sub>e</sub>           | 440 ± 40            | 430 ± 50            | <u>440 ± 30</u>     | 440 ± 30            |
| V <sub>exc</sub> (3.5 Å) | 790 ± 40            | 810 ± 50            | <u>800 ± 30</u>     | <u>790 ± 40</u>     |
| V <sub>exc</sub> (4.0 Å) | 800 ± 50            | 810 ± 40            | <u>790 ± 40</u>     | <u>780 ± 30</u>     |
| V <sub>exc</sub> (4.5 Å) | 820 ± 30            | 780 ± 60            | <u>800 ± 40</u>     | <u>770 ± 40</u>     |

**Table S27.** Slopes (with errors) for 4S-compounds' properties.

|                                             | $F_{00}$                          | $F_{01}$                         | $F_{10}$                          | $F_{11}$                          |
|---------------------------------------------|-----------------------------------|----------------------------------|-----------------------------------|-----------------------------------|
| $E_{SPE(0)}$                                | $30 \pm 10$                       | $32 \pm 8$                       | $30 \pm 10$                       | $32 \pm 7$                        |
| $E_{SPE(+)}$                                | $30 \pm 10$                       | $32 \pm 8$                       | $30 \pm 10$                       | $32 \pm 7$                        |
| $E_{SPE(-)}$                                | $30 \pm 10$                       | $32 \pm 8$                       | $30 \pm 10$                       | $32 \pm 7$                        |
| $I_p$                                       | $0.1 \pm 0.1$                     | $0.1 \pm 0.2$                    | $0.10 \pm 0.09$                   | $0.1 \pm 0.1$                     |
| $E_a$                                       | <b><math>0.11 \pm 0.01</math></b> | <b><math>0.2 \pm 0.01</math></b> | <u><math>0.09 \pm 0.02</math></u> | <b><math>0.14 \pm 0.01</math></b> |
| $E_{HOMO}$                                  | $-0.06 \pm 0.03$                  | $-0.09 \pm 0.06$                 | $-0.06 \pm 0.02$                  | $-0.08 \pm 0.04$                  |
| $E_{LUMO}$                                  | $0.06 \pm 0.02$                   | $0.09 \pm 0.03$                  | $0.05 \pm 0.02$                   | $0.07 \pm 0.03$                   |
| $E_g$                                       | $0.12 \pm 0.03$                   | $0.18 \pm 0.05$                  | <u><math>0.10 \pm 0.02</math></u> | <u><math>0.15 \pm 0.03</math></u> |
| $\Delta H_f$                                | $800 \pm 200$                     | $1200 \pm 400$                   | <u><math>700 \pm 100</math></u>   | <u><math>1000 \pm 200</math></u>  |
| $\Delta G_f$                                | $800 \pm 200$                     | $1100 \pm 400$                   | <u><math>700 \pm 100</math></u>   | <u><math>1000 \pm 200</math></u>  |
| $E_{Abs}$                                   | $0.16 \pm 0.02$                   | $0.24 \pm 0.03$                  | $0.13 \pm 0.02$                   | $0.20 \pm 0.03$                   |
| $E_{Em}$                                    | $0.13 \pm 0.04$                   | $0.18 \pm 0.08$                  | $0.11 \pm 0.03$                   | $0.16 \pm 0.04$                   |
| $\alpha(0;0)$                               | $-2.4 \pm 0.6$                    | $-4 \pm 1$                       | <u><math>-2.1 \pm 0.4</math></u>  | <u><math>-3.0 \pm 0.5</math></u>  |
| $\alpha(-1907 \text{ nm}; 1907 \text{ nm})$ | $-2.3 \pm 0.4$                    | $-4 \pm 1$                       | <u><math>-2.0 \pm 0.6</math></u>  | <u><math>-3.2 \pm 0.3</math></u>  |
| $\alpha(-1370 \text{ nm}; 1370 \text{ nm})$ | $-2.5 \pm 0.7$                    | $-4 \pm 1$                       | <u><math>-2.0 \pm 0.5</math></u>  | <u><math>-3.1 \pm 0.3</math></u>  |
| $\alpha(-1064 \text{ nm}; 1064 \text{ nm})$ | $-2.3 \pm 0.5$                    | $-4 \pm 1$                       | <u><math>-2.3 \pm 0.6</math></u>  | <u><math>-3.3 \pm 0.4</math></u>  |
| $\alpha(-910 \text{ nm}; 910 \text{ nm})$   | $-2.2 \pm 0.5$                    | $-4 \pm 1$                       | <u><math>-2.2 \pm 0.4</math></u>  | <u><math>-3.0 \pm 0.5</math></u>  |
| $\alpha(-830 \text{ nm}; 830 \text{ nm})$   | $-2.5 \pm 0.7$                    | $-4 \pm 1$                       | <u><math>-2.1 \pm 0.5</math></u>  | <u><math>-3.1 \pm 0.5</math></u>  |
| $\lambda_h$                                 | $-20 \pm 5$                       | $-30 \pm 10$                     | <u><math>-18 \pm 3</math></u>     | $-24 \pm 5$                       |
| $\lambda_e$                                 | $-40 \pm 10$                      | $-60 \pm 20$                     | <u><math>-39 \pm 7</math></u>     | $-50 \pm 10$                      |
| $V_{exc}(3.5 \text{ \AA})$                  | $70 \pm 10$                       | $110 \pm 30$                     | <u><math>62 \pm 9</math></u>      | <u><math>90 \pm 10</math></u>     |
| $V_{exc}(4.0 \text{ \AA})$                  | $70 \pm 20$                       | $110 \pm 40$                     | <u><math>62 \pm 8</math></u>      | <u><math>91 \pm 7</math></u>      |
| $V_{exc}(4.5 \text{ \AA})$                  | $70 \pm 10$                       | $110 \pm 40$                     | <u><math>62 \pm 9</math></u>      | <u><math>91 \pm 8</math></u>      |

**Table S28.** Intercepts (with errors) for 5O-compounds' properties.

|                          | F <sub>00</sub>    | F <sub>01</sub>    | F <sub>10</sub>    | F <sub>11</sub>    |
|--------------------------|--------------------|--------------------|--------------------|--------------------|
| E <sub>SPE(0)</sub>      | -1100 ± 40         | -1100 ± 40         | -1100 ± 40         | -1100 ± 40         |
| E <sub>SPE(+)</sub>      | -1100 ± 40         | -1100 ± 40         | -1100 ± 40         | -1100 ± 40         |
| E <sub>SPE(-)</sub>      | -1100 ± 40         | -1100 ± 40         | -1100 ± 40         | -1100 ± 40         |
| I <sub>p</sub>           | 6.4 ± 0.1          | 6.4 ± 0.1          | 6.4 ± 0.1          | 6.40 ± 0.0         |
| E <sub>a</sub>           | -1.01 ± 0.04       | -1.01 ± 0.04       | -0.99 ± 0.05       | -0.99 ± 0.05       |
| E <sub>HOMO</sub>        | -5.3 ± 0.1         | -5.4 ± 0.1         | -5.33 ± 0.09       | -5.32 ± 0.08       |
| E <sub>LUMO</sub>        | -2.03 ± 0.06       | -2.03 ± 0.05       | -2.02 ± 0.06       | -2.03 ± 0.06       |
| E <sub>g</sub>           | <b>3.27 ± 0.04</b> | <b>3.28 ± 0.06</b> | <b>3.30 ± 0.04</b> | <b>3.29 ± 0.03</b> |
| ΔH <sub>f</sub>          | -20700 ± 900       | -20600 ± 900       | -20400 ± 900       | -20600 ± 900       |
| ΔG <sub>f</sub>          | -19300 ± 800       | -19200 ± 800       | -19100 ± 900       | -19200 ± 800       |
| E <sub>Abs</sub>         | <u>3.26 ± 0.06</u> | <u>3.26 ± 0.07</u> | <u>3.29 ± 0.08</u> | <u>3.27 ± 0.07</u> |
| E <sub>Em</sub>          | <u>2.98 ± 0.06</u> | <u>3.00 ± 0.07</u> | <u>3.02 ± 0.0</u>  | <u>3.00 ± 0.07</u> |
| α(0;0)                   | 53 ± 2             | 53 ± 2             | <u>52 ± 2</u>      | <u>52 ± 2</u>      |
| α(-1907 nm; 1907 nm)     | 54 ± 3             | 52 ± 1             | <u>54 ± 1</u>      | <u>53 ± 1</u>      |
| α(-1370 nm; 1370 nm)     | 52 ± 1             | 54 ± 3             | <u>52 ± 3</u>      | <u>52 ± 2</u>      |
| α(-1064 nm; 1064 nm)     | 52 ± 2             | 53 ± 2             | <u>52 ± 3</u>      | <u>54 ± 3</u>      |
| α(-910 nm; 910 nm)       | 53 ± 3             | 52 ± 4             | <u>51 ± 1</u>      | <u>53 ± 1</u>      |
| α(-830 nm; 830 nm)       | 54 ± 2             | 54 ± 1             | <u>53 ± 2</u>      | <u>52 ± 3</u>      |
| λ <sub>h</sub>           | 240 ± 20           | 240 ± 20           | 240 ± 20           | 240 ± 20           |
| λ <sub>e</sub>           | 250 ± 20           | 250 ± 20           | 240 ± 20           | 250 ± 20           |
| V <sub>exc</sub> (3.5 Å) | <u>840 ± 30</u>    | <u>840 ± 40</u>    | <b>697 ± 4</b>     | <b>850 ± 10</b>    |
| V <sub>exc</sub> (4.0 Å) | <u>850 ± 30</u>    | <u>830 ± 30</u>    | <b>689 ± 6</b>     | <b>848 ± 8</b>     |
| V <sub>exc</sub> (4.5 Å) | <u>840 ± 40</u>    | <u>840 ± 30</u>    | <b>695 ± 3</b>     | <b>849 ± 9</b>     |

**Table S29.** Slopes (with errors) for 5O-compounds' properties.

|                          | F <sub>00</sub>      | F <sub>01</sub>    | F <sub>10</sub>      | F <sub>11</sub>      |
|--------------------------|----------------------|--------------------|----------------------|----------------------|
| E <sub>SPE(0)</sub>      | 27 ± 7               | 40 ± 10            | 17 ± 5               | 30 ± 8               |
| E <sub>SPE(+)</sub>      | 27 ± 7               | 40 ± 10            | 17 ± 5               | 30 ± 8               |
| E <sub>SPE(-)</sub>      | 27 ± 7               | 40 ± 10            | 17 ± 5               | 30 ± 8               |
| I <sub>p</sub>           | 0.01 ± 0.02          | 0.16 ± 0.04        | 0.06 ± 0.01          | 0.11 ± 0.02          |
| E <sub>a</sub>           | 0.041 ± 0.008        | 0.07 ± 0.01        | 0.026 ± 0.006        | 0.04 ± 0.01          |
| E <sub>HOMO</sub>        | -0.08 ± 0.02         | -0.12 ± 0.04       | -0.05 ± 0.01         | -0.08 ± 0.02         |
| E <sub>LUMO</sub>        | 0.02 ± 0.01          | 0.03 ± 0.01        | 0.011 ± 0.07         | 0.02 ± 0.01          |
| E <sub>g</sub>           | <b>0.094 ± 0.008</b> | <b>0.16 ± 0.02</b> | <b>0.061 ± 0.005</b> | <b>0.104 ± 0.007</b> |
| ΔH <sub>f</sub>          | 600 ± 200            | 1000 ± 300         | 406 ± 100            | 700 ± 200            |
| ΔG <sub>f</sub>          | 600 ± 200            | 1000 ± 300         | 400 ± 100            | 600 ± 200            |
| E <sub>Abs</sub>         | 0.09 ± 0.01          | 0.15 ± 0.02        | 0.06 ± 0.01          | 0.10 ± 0.01          |
| E <sub>Em</sub>          | 0.09 ± 0.01          | 0.14 ± 0.02        | 0.05 ± 0.01          | 0.09 ± 0.01          |
| α(0;0)                   | -2.0 ± 0.4           | -3.3 ± 0.7         | -1.3 ± 0.3           | -2.2 ± 0.5           |
| α(-1907 nm; 1907 nm)     | -1.9 ± 0.5           | -3.2 ± 0.8         | -1.4 ± 0.4           | -2.1 ± 0.4           |
| α(-1370 nm; 1370 nm)     | -2.0 ± 0.3           | -3.3 ± 0.6         | -1.4 ± 0.4           | -2.3 ± 0.4           |
| α(-1064 nm; 1064 nm)     | -2.1 ± 0.4           | -3.4 ± 0.5         | -1.2 ± 0.2           | -2.2 ± 0.3           |
| α(-910 nm; 910 nm)       | -2.0 ± 0.3           | -3.3 ± 0.6         | -1.3 ± 0.4           | -2.3 ± 0.5           |
| α(-830 nm; 830 nm)       | -1.9 ± 0.3           | -3.2 ± 0.7         | -1.2 ± 0.3           | -2.2 ± 0.4           |
| λ <sub>h</sub>           | 1 ± 3                | 2 ± 5              | 1 ± 2                | 1 ± 3                |
| λ <sub>e</sub>           | -5 ± 3               | -8 ± 6             | -3 ± 2               | 5 ± 4                |
| V <sub>exc</sub> (3.5 Å) | 490 ± 5              | 800 ± 10           | 330 ± 1              | 550 ± 2              |
| V <sub>exc</sub> (4.0 Å) | 493 ± 4              | 820 ± 10           | 333 ± 2              | 548 ± 3              |
| V <sub>exc</sub> (4.5 Å) | 492 ± 6              | 810 ± 10           | 329 ± 1              | 551 ± 2              |

**Table S30.** Intercepts (with errors) for 5S-compounds' properties.

|                          | F <sub>00</sub>     | F <sub>01</sub>     | F <sub>10</sub>     | F <sub>11</sub>     |
|--------------------------|---------------------|---------------------|---------------------|---------------------|
| E <sub>SPE(0)</sub>      | -1700 ± 40          | -1700 ± 40          | -1700 ± 40          | -1700 ± 40          |
| E <sub>SPE(+)</sub>      | -1700 ± 40          | -1700 ± 40          | -1700 ± 40          | -1700 ± 40          |
| E <sub>SPE(-)</sub>      | -1700 ± 40          | -1700 ± 40          | -1700 ± 40          | -1700 ± 40          |
| I <sub>p</sub>           | 6.5 ± 0.1           | 6.5 ± 0.1           | 6.54 ± 0.09         | 6.52 ± 0.09         |
| E <sub>a</sub>           | <b>-1.18 ± 0.02</b> | <b>-1.18 ± 0.01</b> | <u>-1.16 ± 0.04</u> | <u>-1.17 ± 0.04</u> |
| E <sub>HOMO</sub>        | -5.5 ± 0.1          | -5.6 ± 0.1          | -5.55 ± 0.09        | -5.54 ± 0.09        |
| E <sub>LUMO</sub>        | -2.05 ± 0.03        | -2.04 ± 0.02        | -2.06 ± 0.04        | -2.05 ± 0.03        |
| E <sub>g</sub>           | 3.49 ± 0.08         | 3.50 ± 0.09         | 3.51 ± 0.08         | 3.50 ± 0.07         |
| ΔH <sub>f</sub>          | -21200 ± 900        | -21100 ± 900        | -20900 ± 900        | -21100 ± 900        |
| ΔG <sub>f</sub>          | -19800 ± 800        | 3.36 ± 0.09         | -19500 ± 900        | -19600 ± 800        |
| E <sub>Abs</sub>         | <u>3.35 ± 0.08</u>  | <u>3.00 ± 0.07</u>  | <u>3.37 ± 0.07</u>  | <u>3.36 ± 0.06</u>  |
| E <sub>Em</sub>          | 2.9 ± 0.1           | 2.93 ± 0.1          | 0.11534             | 2.9 ± 0.1           |
| α(0;0)                   | 57 ± 2              | 57 ± 2              | <u>56 ± 2</u>       | <u>56 ± 2</u>       |
| α(-1907 nm; 1907 nm)     | 57 ± 1              | 55 ± 3              | <u>55 ± 1</u>       | <u>57 ± 3</u>       |
| α(-1370 nm; 1370 nm)     | 56 ± 2              | 56 ± 3              | <u>57 ± 2</u>       | <u>57 ± 2</u>       |
| α(-1064 nm; 1064 nm)     | 56 ± 3              | 58 ± 2              | <u>56 ± 3</u>       | <u>55 ± 1</u>       |
| α(-910 nm; 910 nm)       | 58 ± 2              | 58 ± 4              | <u>54 ± 2</u>       | <u>56 ± 2</u>       |
| α(-830 nm; 830 nm)       | 57 ± 2              | 55 ± 2              | <u>55 ± 2</u>       | <u>55 ± 3</u>       |
| λ <sub>h</sub>           | <b>348 ± 6</b>      | <b>347.9 ± 0.8</b>  | <b>340 ± 14</b>     | <b>340 ± 14</b>     |
| λ <sub>e</sub>           | <b>421 ± 4</b>      | <b>421 ± 6</b>      | <b>415 ± 6</b>      | <b>418 ± 7</b>      |
| V <sub>exc</sub> (3.5 Å) | <u>770 ± 30</u>     | 780 ± 40            | <u>670 ± 30</u>     | <b>782 ± 7</b>      |
| V <sub>exc</sub> (4.0 Å) | <u>760 ± 30</u>     | 770 ± 40            | <u>660 ± 20</u>     | <b>785 ± 8</b>      |
| V <sub>exc</sub> (4.5 Å) | <u>770 ± 40</u>     | 780 ± 50            | <u>650 ± 30</u>     | <b>783 ± 4</b>      |



**Table S31.** Slopes (with errors) for 5S-compounds' properties.

|                          | F <sub>00</sub>      | F <sub>01</sub>      | F <sub>10</sub>      | F <sub>11</sub>      |
|--------------------------|----------------------|----------------------|----------------------|----------------------|
| E <sub>SPE(0)</sub>      | 30 ± 7               | 40 ± 10              | 17 ± 5               | 30 ± 8               |
| E <sub>SPE(+)</sub>      | 30 ± 7               | 40 ± 10              | 17 ± 5               | 30 ± 8               |
| E <sub>SPE(-)</sub>      | 30 ± 7               | 40 ± 10              | 17 ± 5               | 30 ± 8               |
| I <sub>p</sub>           | 0.06 ± 0.02          | 0.11 ± 0.03          | 0.04 ± 0.01          | 0.08 ± 0.02          |
| E <sub>a</sub>           | <b>0.057 ± 0.004</b> | <b>0.094 ± 0.003</b> | <u>0.036 ± 0.005</u> | <u>0.062 ± 0.008</u> |
| E <sub>HOMO</sub>        | -0.03 ± 0.02         | -0.05 ± 0.03         | -0.02 ± 0.01         | -0.03 ± 0.02         |
| E <sub>LUMO</sub>        | 0.02 ± 0.01          | 0.03 ± 0.02          | 0.03 ± 0.01          | 0.02 ± 0.01          |
| E <sub>g</sub>           | 0.05 ± 0.02          | 0.09 ± 0.03          | 0.03 ± 0.01          | 0.06 ± 0.02          |
| ΔH <sub>f</sub>          | 600 ± 200            | 1000 ± 300           | 400 ± 100            | 700 ± 200            |
| ΔG <sub>f</sub>          | 600 ± 200            | 400 ± 200            | 400 ± 100            | 600 ± 200            |
| E <sub>Abs</sub>         | <u>0.08 ± 0.01</u>   | <u>0.13 ± 0.03</u>   | <u>0.052 ± 0.008</u> | <u>0.09 ± 0.01</u>   |
| E <sub>Em</sub>          | 0.05 ± 0.02          | 0.09 ± 0.04          | 0.04 ± 0.01          | 0.06 ± 0.02          |
| α(0;0)                   | -1.9 ± 0.4           | -3.1 ± 0.8           | <u>-1.2 ± 0.3</u>    | <u>-2.1 ± 0.5</u>    |
| α(-1907 nm; 1907 nm)     | -1.9 ± 0.5           | -3.2 ± 0.9           | <u>-1.3 ± 0.3</u>    | <u>-2.0 ± 0.4</u>    |
| α(-1370 nm; 1370 nm)     | -1.8 ± 0.5           | -3.1 ± 0.8           | <u>-1.2 ± 0.4</u>    | <u>-2.1 ± 0.5</u>    |
| α(-1064 nm; 1064 nm)     | -1.9 ± 0.4           | -3.1 ± 0.7           | <u>-1.1 ± 0.5</u>    | <u>-2.3 ± 0.6</u>    |
| α(-910 nm; 910 nm)       | -2.0 ± 0.3           | -3.0 ± 0.7           | <u>-1.1 ± 0.2</u>    | <u>-2.2 ± 0.4</u>    |
| α(-830 nm; 830 nm)       | -2.0 ± 0.3           | -3.2 ± 0.8           | <u>-1.3 ± 0.3</u>    | <u>-2.1 ± 0.4</u>    |
| λ <sub>h</sub>           | <b>-23 ± 1</b>       | <b>-38.1 ± 0.3</b>   | <b>-15 ± 2</b>       | <b>-25 ± 3</b>       |
| λ <sub>e</sub>           | <b>-19.6 ± 0.7</b>   | <b>-32 ± 2</b>       | <b>-12.8 ± 0.8</b>   | <b>-21 ± 1</b>       |
| V <sub>exc</sub> (3.5 Å) | <u>52 ± 4</u>        | 90 ± 10              | <u>30 ± 3</u>        | <b>59 ± 1</b>        |
| V <sub>exc</sub> (4.0 Å) | <u>55 ± 5</u>        | 90 ± 10              | <u>32 ± 2</u>        | <b>57 ± 1</b>        |
| V <sub>exc</sub> (4.5 Å) | <u>54 ± 2</u>        | 90 ± 10              | <u>29 ± 3</u>        | <b>58 ± 1</b>        |

**Footnote to Tables S24 – S31**

E<sub>SPE(0)</sub>, E<sub>SPE(+)</sub>, E<sub>SPE(-)</sub> - single-point energies at neutral, cationic and anionic states respectively; I<sub>p</sub> - ionisation potential; E<sub>a</sub> - electron affinity; E<sub>HOMO</sub>, E<sub>LUMO</sub> - energies of HOMO, LUMO respectively; E<sub>g</sub> - electron gap between boundary orbitals; E<sub>abs</sub>, E<sub>em</sub> - transition energy for the brightest absorption electronic band and S<sub>1</sub> → S<sub>0</sub> emission (fluorescence) energy; α(0;0), α(-1907 nm; 1907 nm), α(-1370 nm; 1370 nm), α(-1064 nm; 1064 nm), α(-910 nm; 910 nm), α(-830 nm; 830 nm) - first static and dynamic molecular electric isotropic polarisabilities; λ<sub>h</sub> - hole reorganisation energy; λ<sub>e</sub> - electron reorganisation energy; V<sub>exc</sub> (3.5 Å), V<sub>exc</sub> (4.0 Å), V<sub>exc</sub> (4.5 Å) - exciton couplings evaluated different distances.

## 4. Graphical representation of correlations with F-index

### Legend of graphical representation

Correlations of 4O (filled red squares), 4S (filled blue circles), 5O (red squares) and 5S (blue circles) compound groups with: (a)  $F_{00}$  index; (b)  $F_{01}$  index; (c)  $F_{10}$  index; (d)  $F_{11}$  index correlation. Regression lines shown with the respective colours in a solid line for 4-ringed compounds and in a hyphened line for 5-ringed compounds.

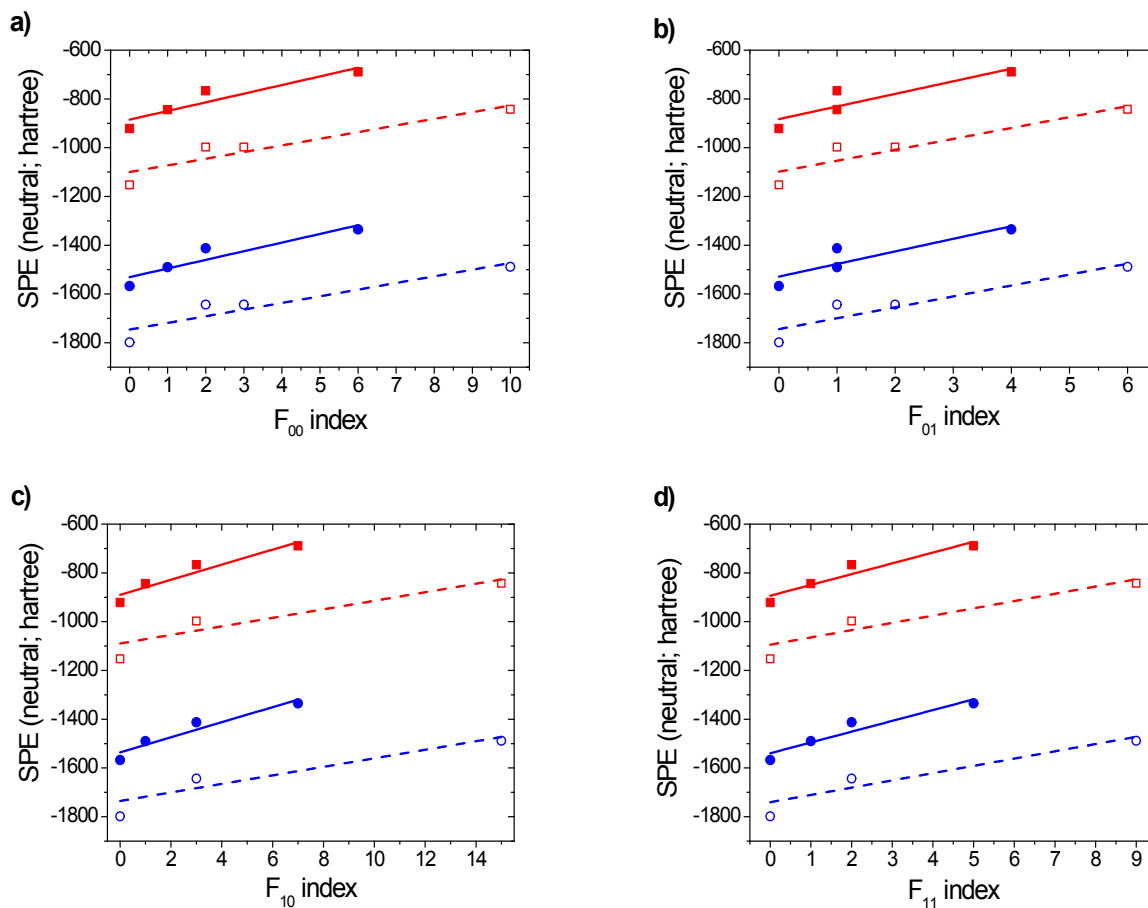

Figure S1. Single-point energy in neutral state.

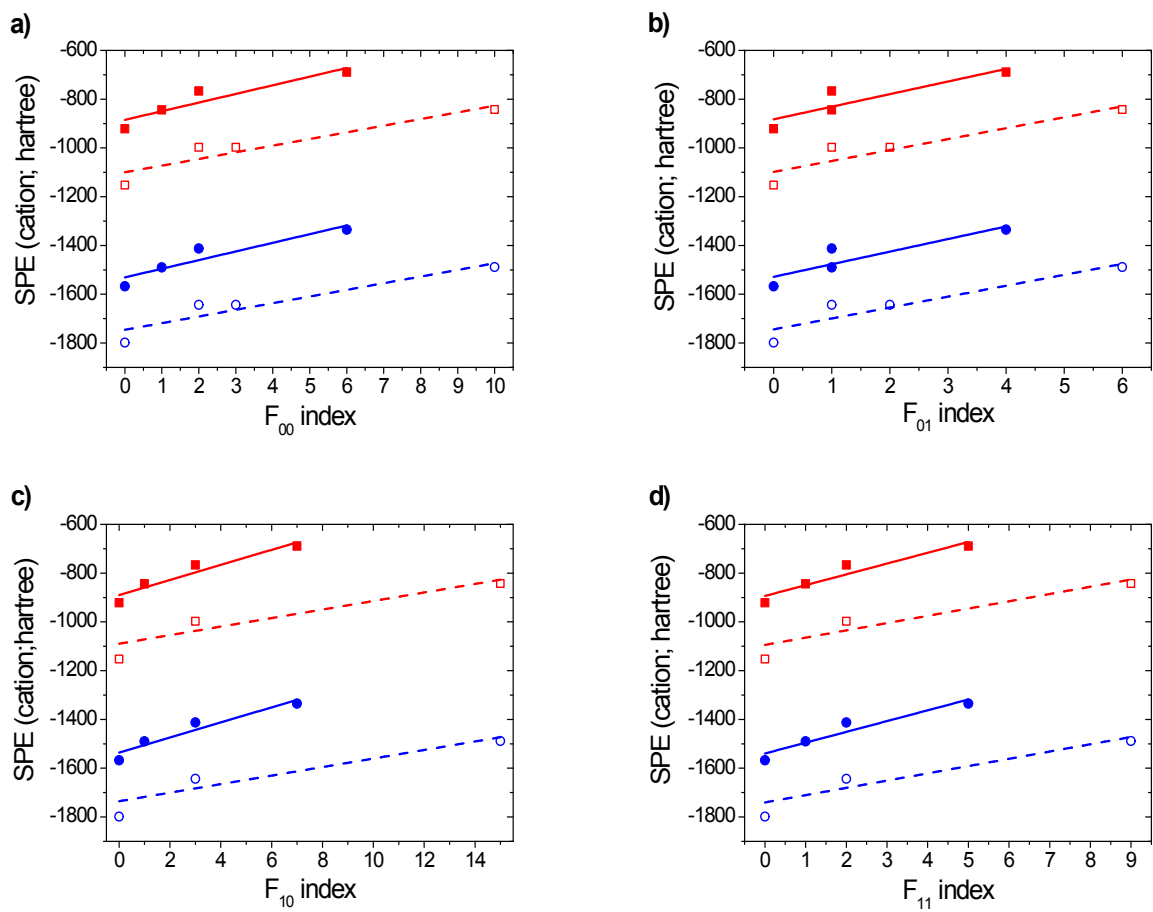

Figure S2. Single-point energy in cationic state.

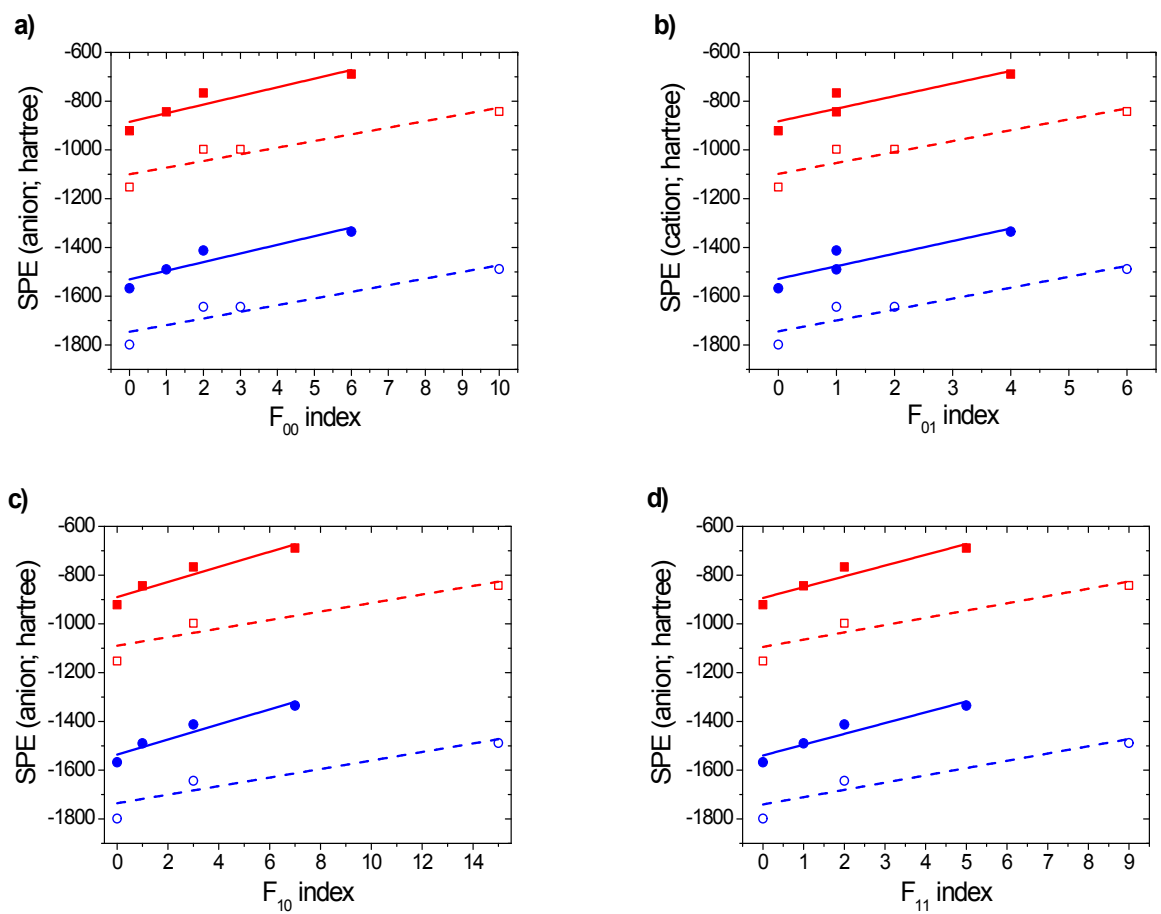

Figure S3. Single-point energy in anionic state.

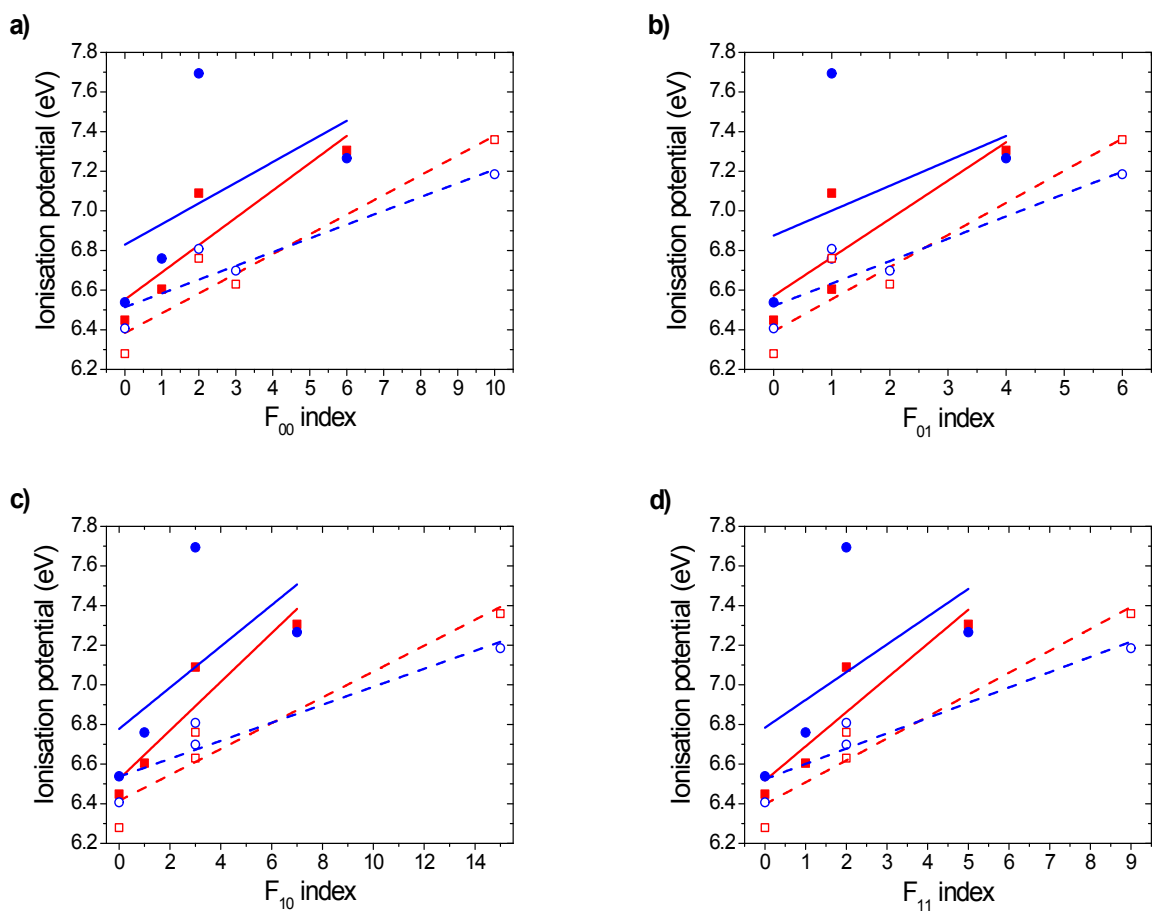

Figure S4. Ionisation potential.

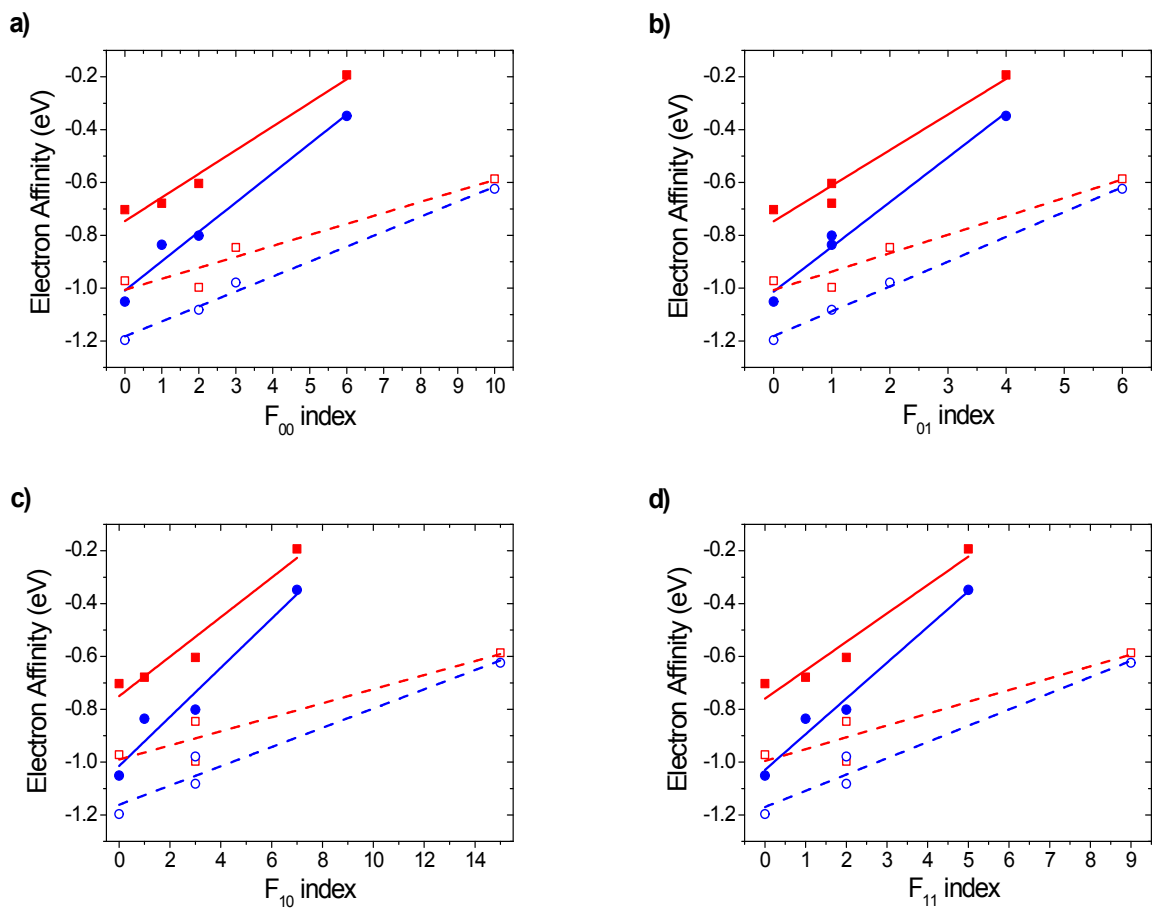

Figure S5. Electron affinity.

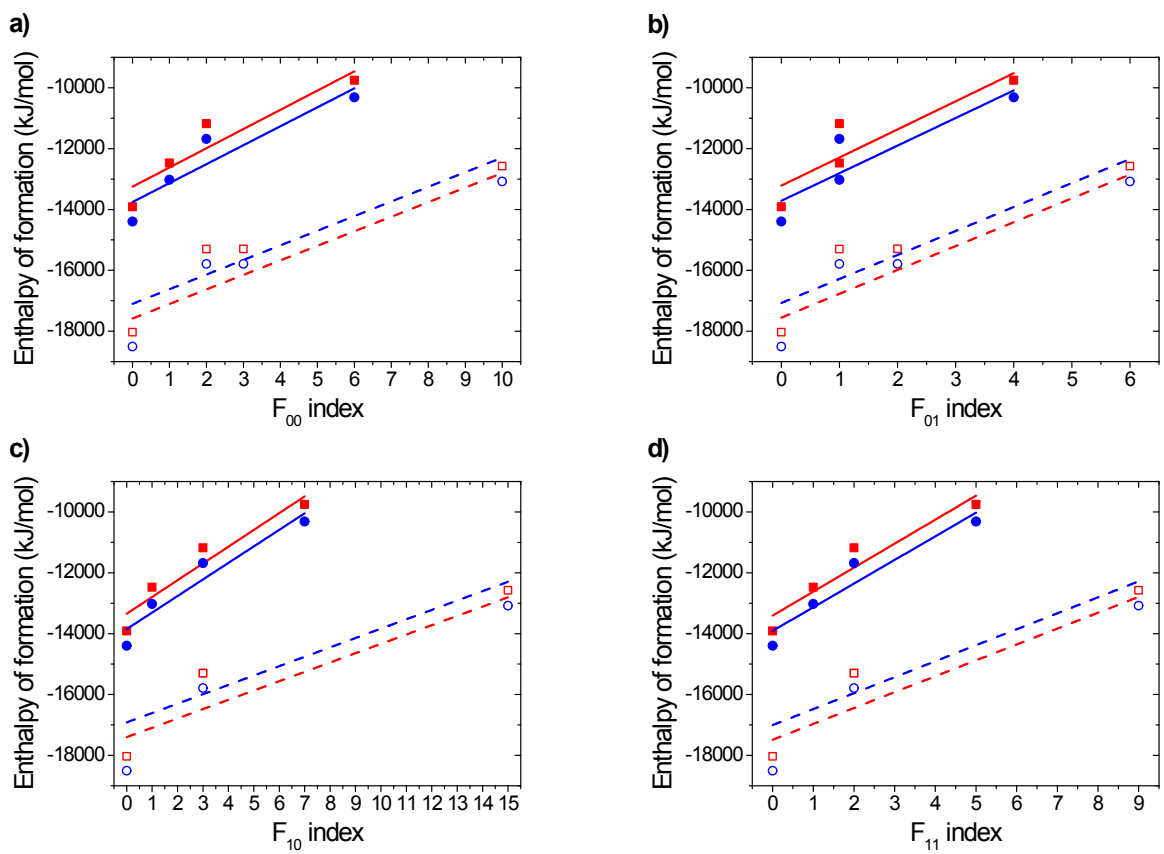

Figure S6. Enthalpy of formation.

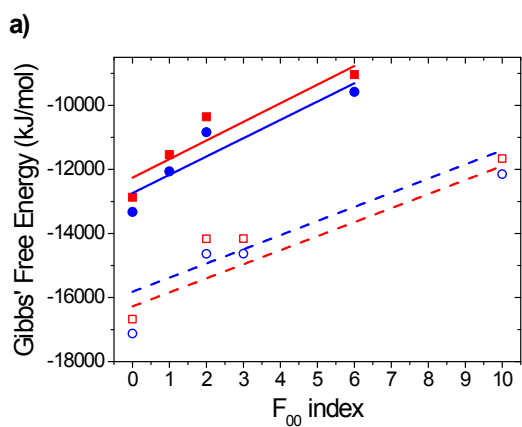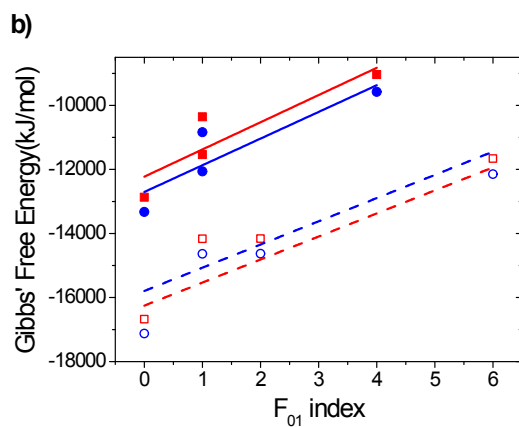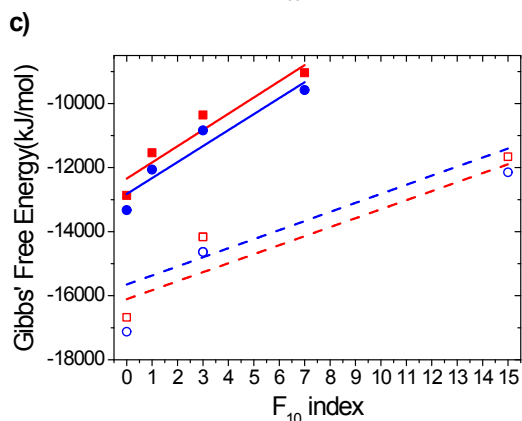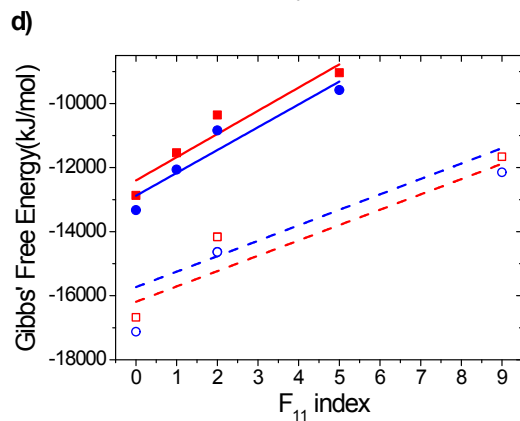

Figure S7. Gibbs' free energy of formation.



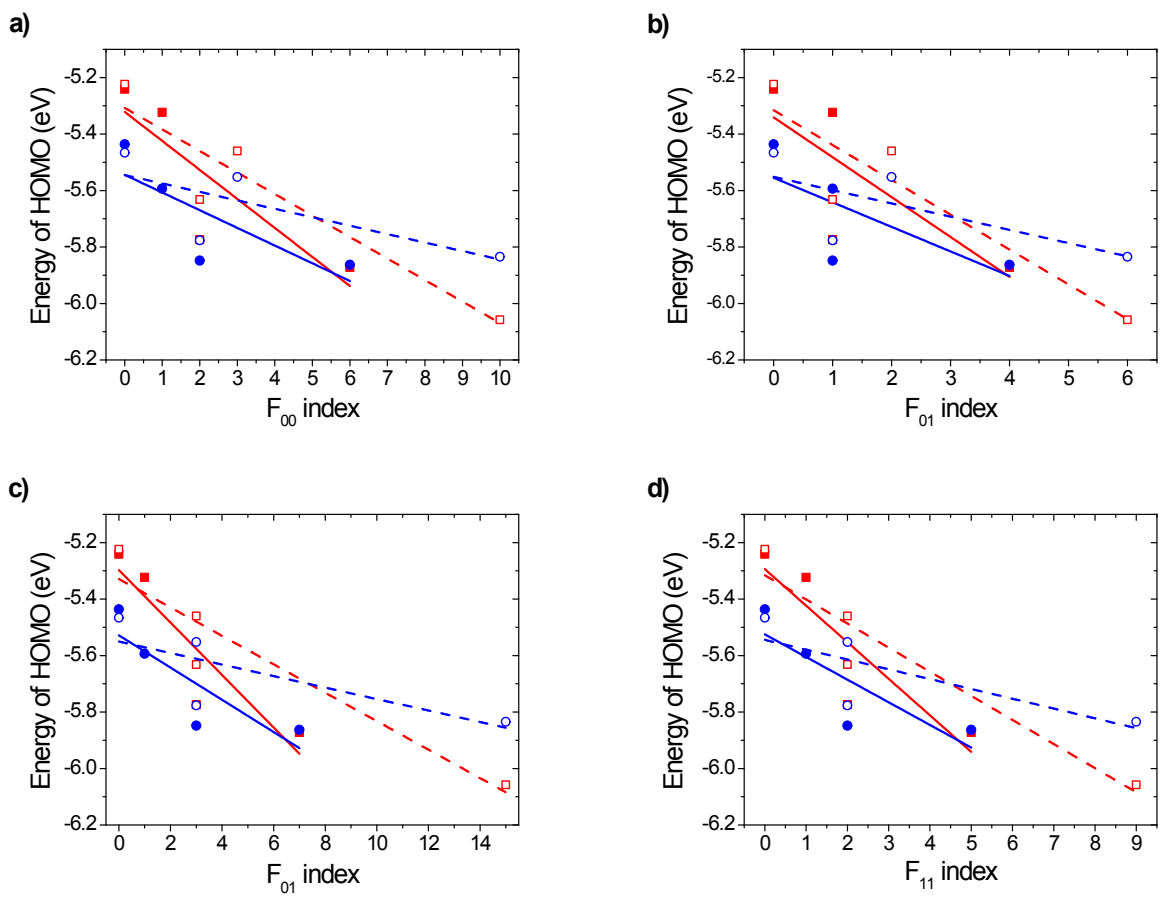

**Figure S8.** Energy of HOMO.

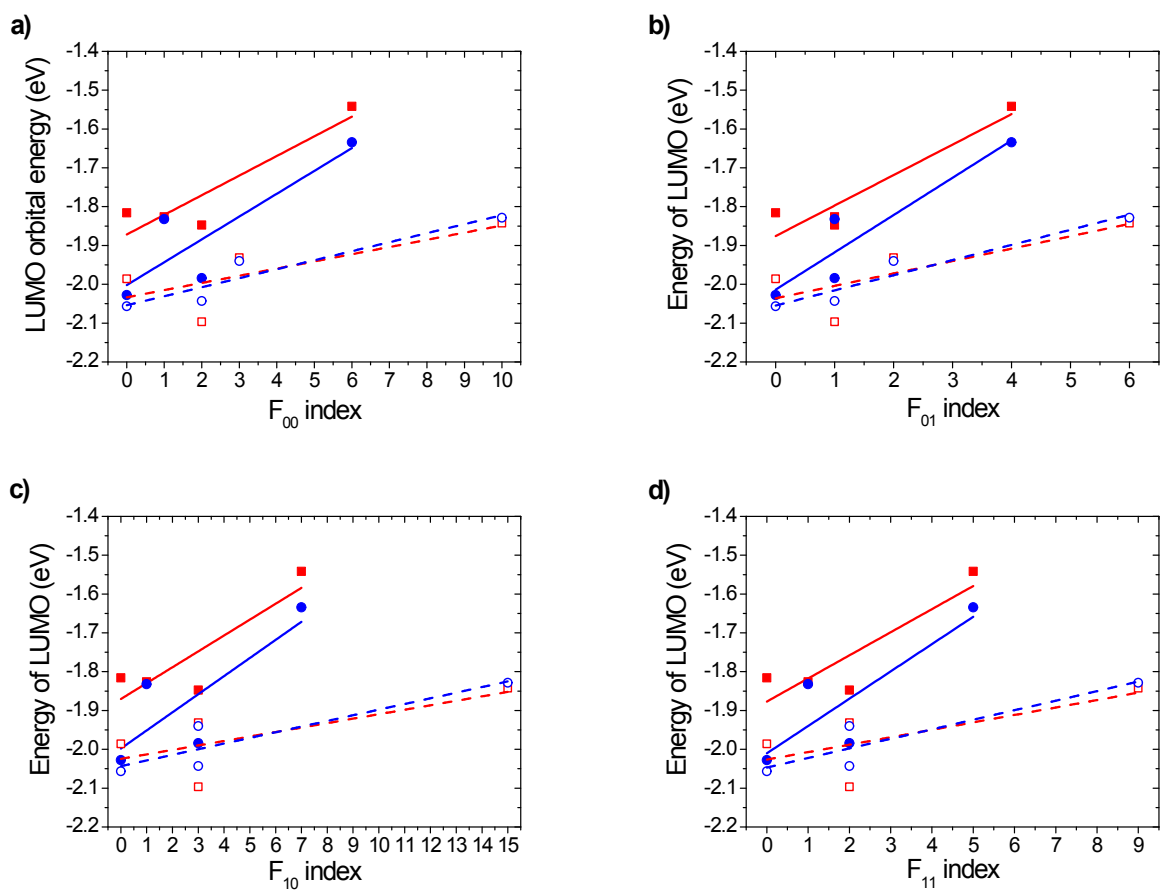

**Figure S9.** Energy of LUMO.

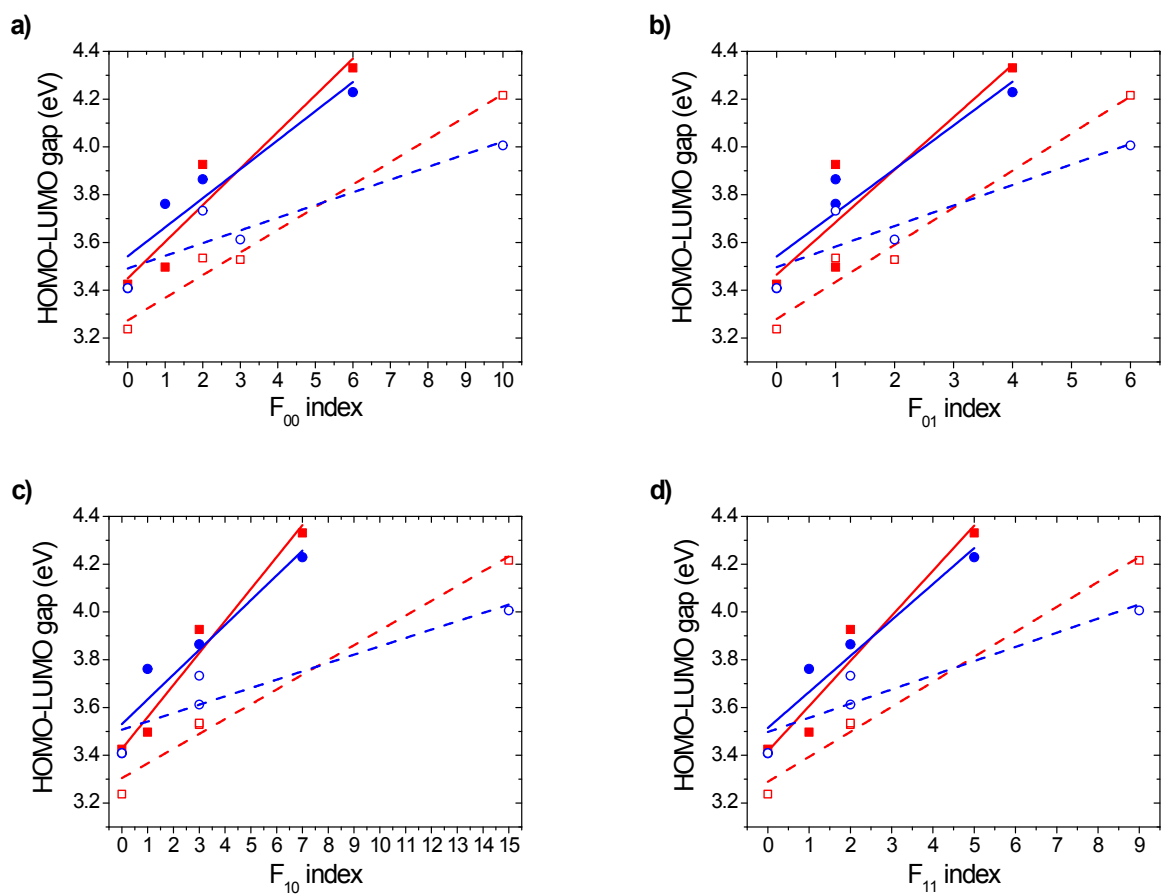

Figure S10. HOMO-LUMO gap.

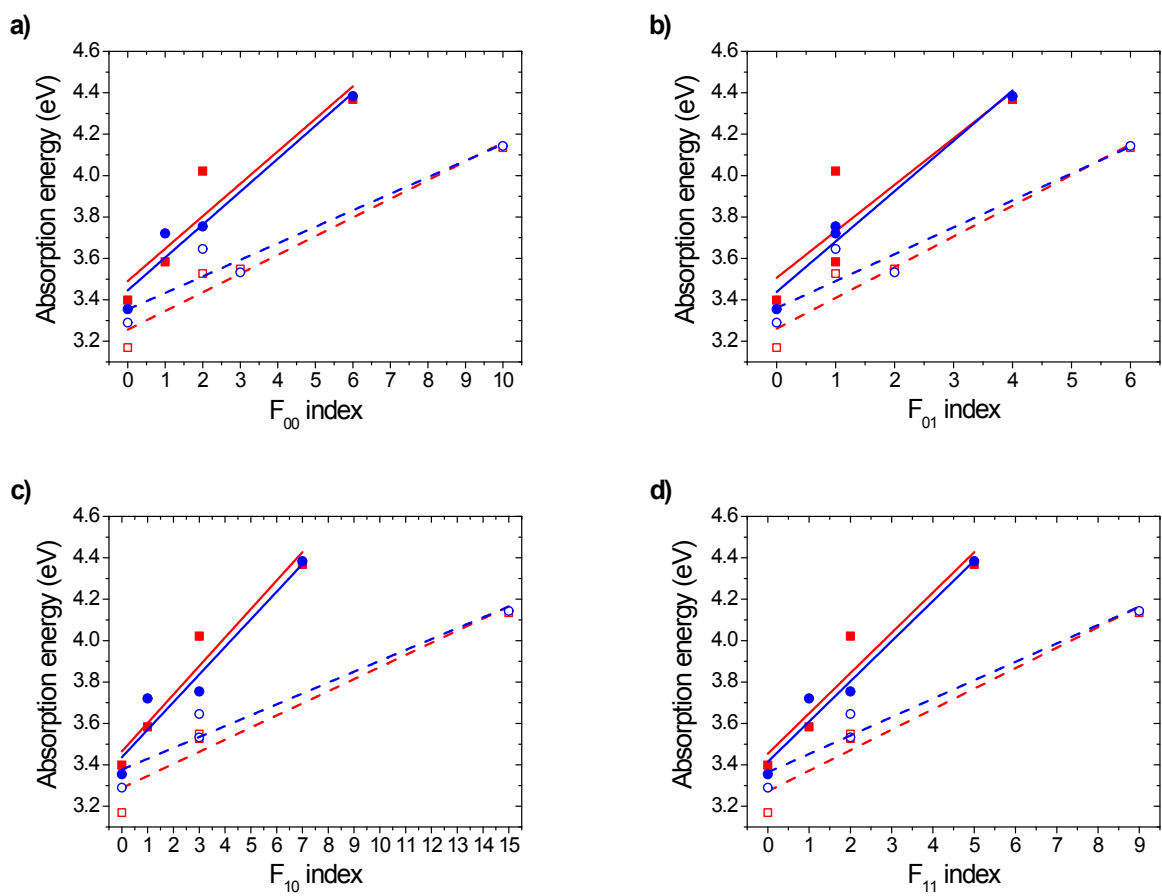

**Figure S11.** Absorption energy for the brightest  $S_0 \rightarrow S_n$  transition.

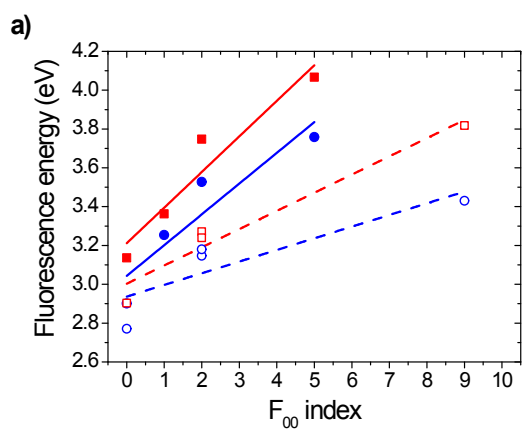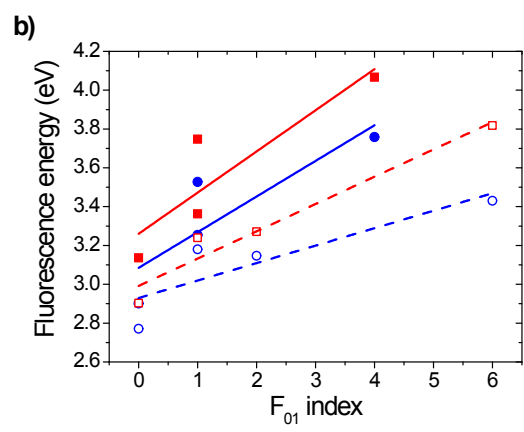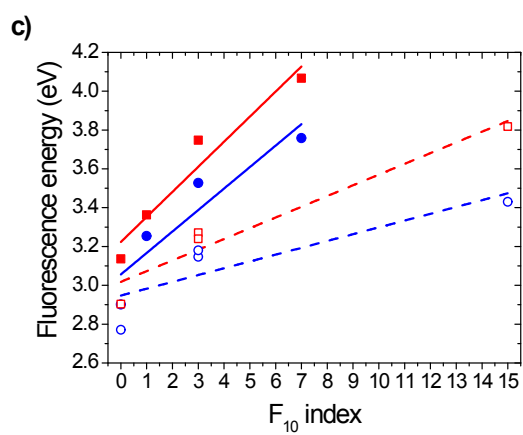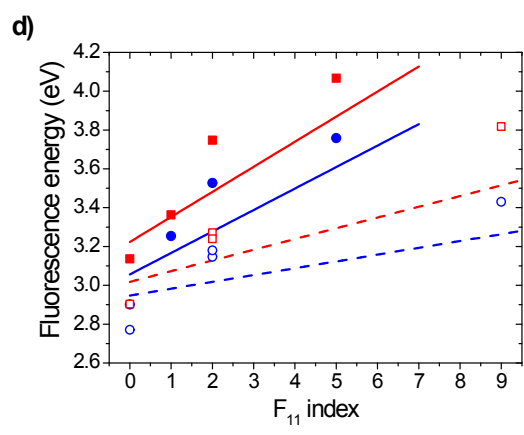

Figure S12. Fluorescence energy.

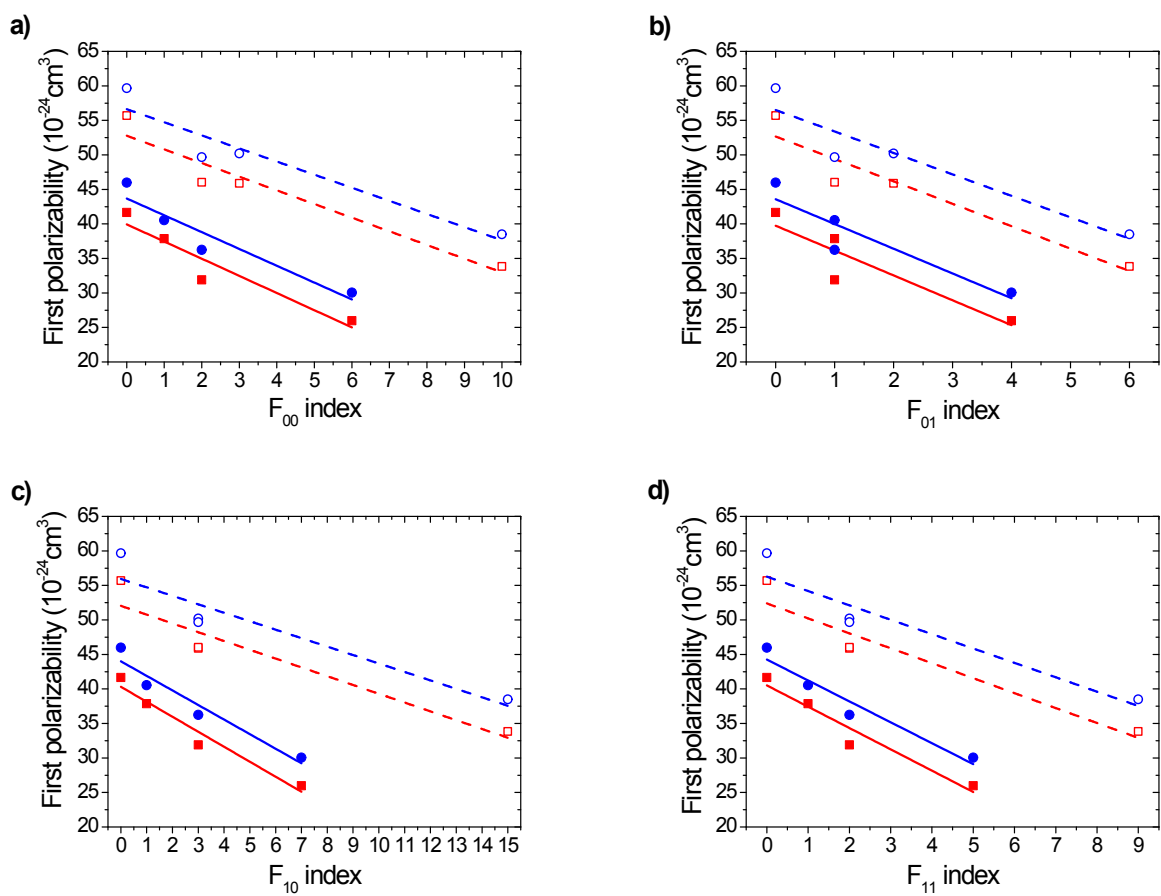

**Figure S13.** First static electric polarisability.

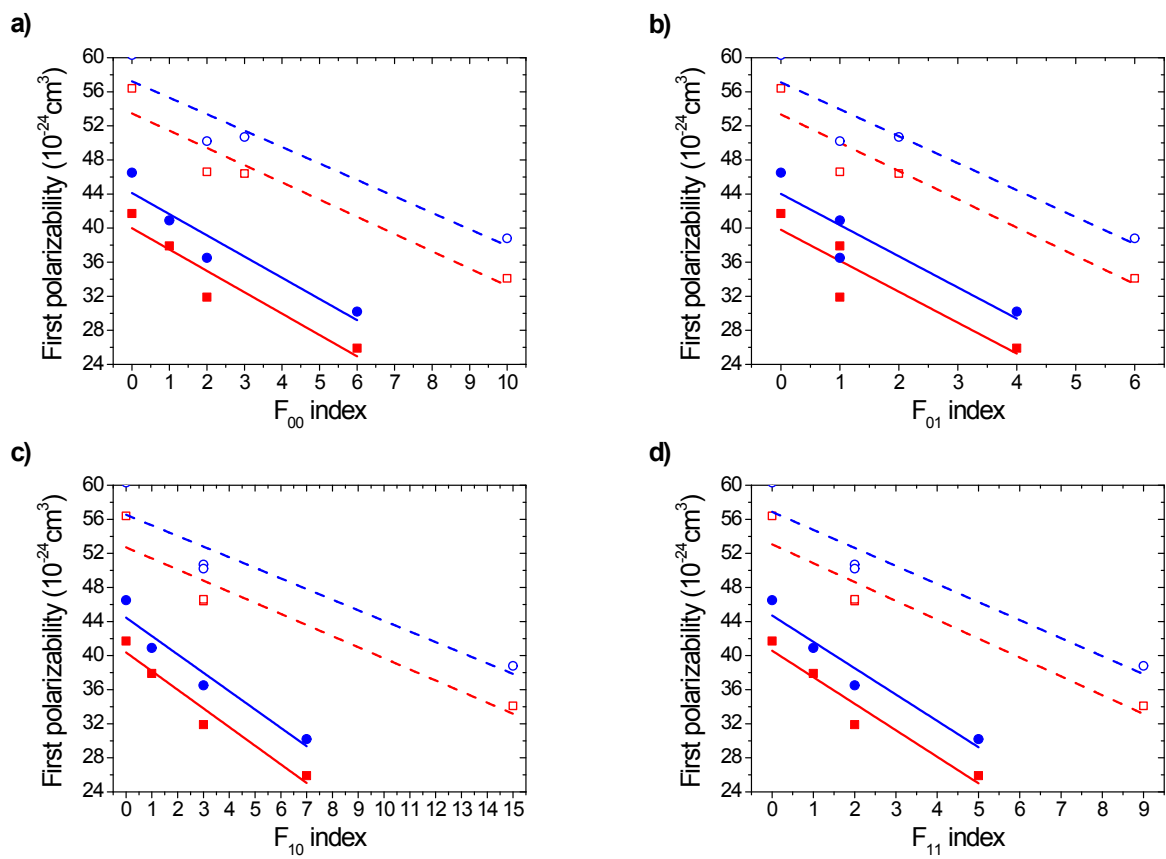

**Figure S14.** First dynamic electric polarisability (at  $\lambda = 1970 \text{ nm}$ ).

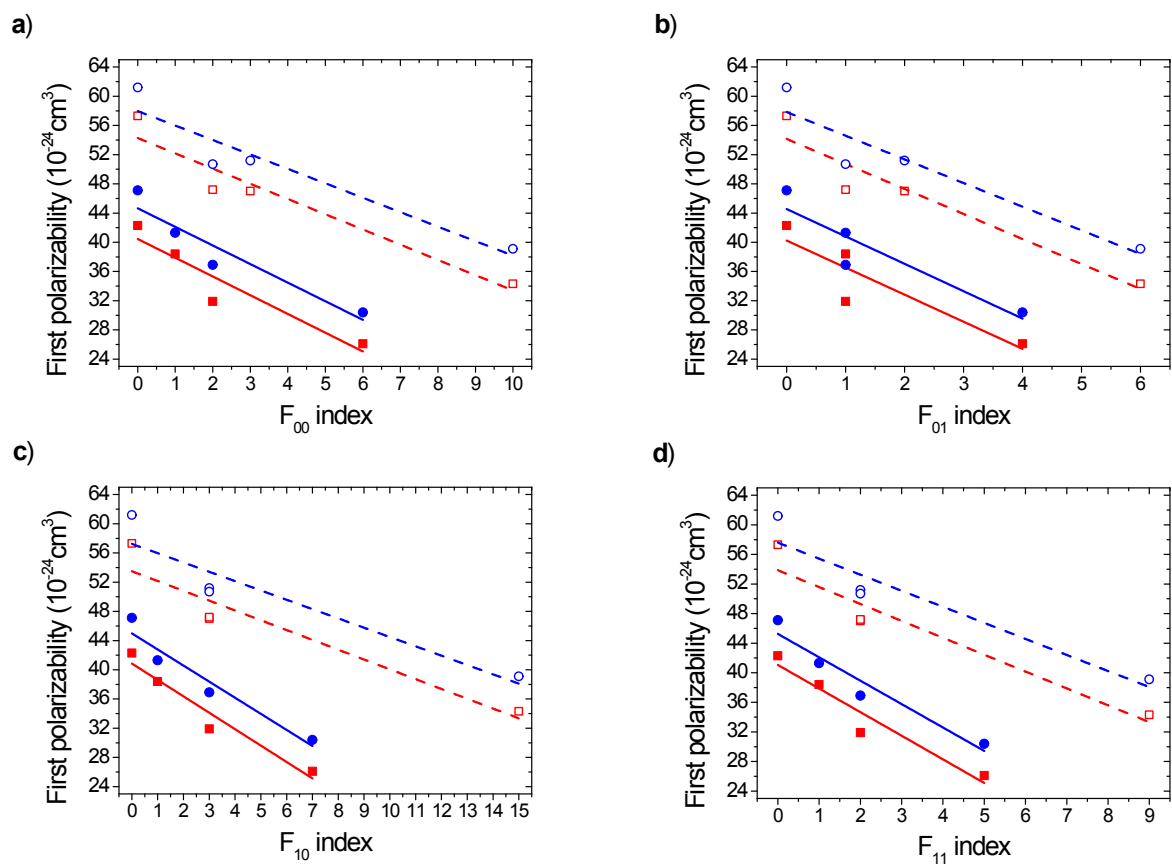

**Figure S15.** First dynamic electric polarisability (at  $\lambda = 1370 \text{ nm}$ ).



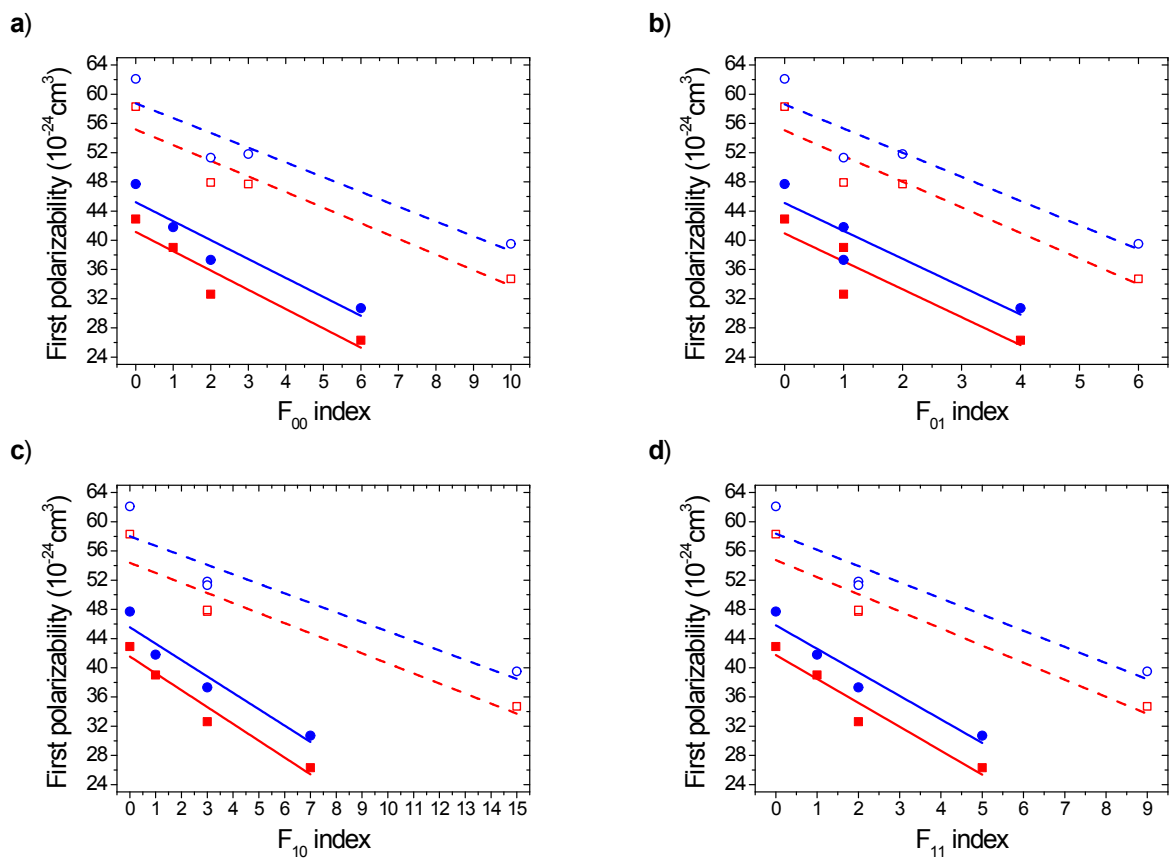

**Figure S16.** First dynamic electric polarisability (at  $\lambda = 1064 \text{ nm}$ ).

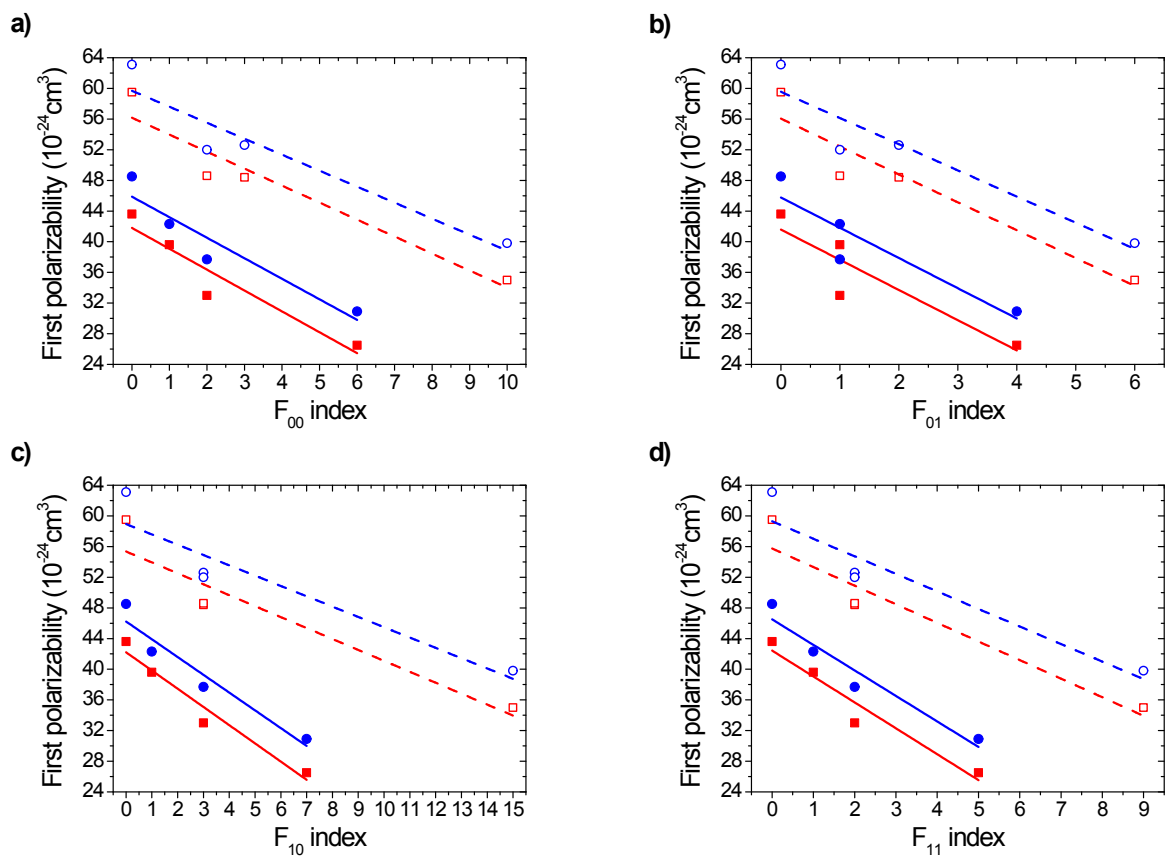

**Figure S17.** First dynamic electric polarisability (at  $\lambda = 910$  nm).

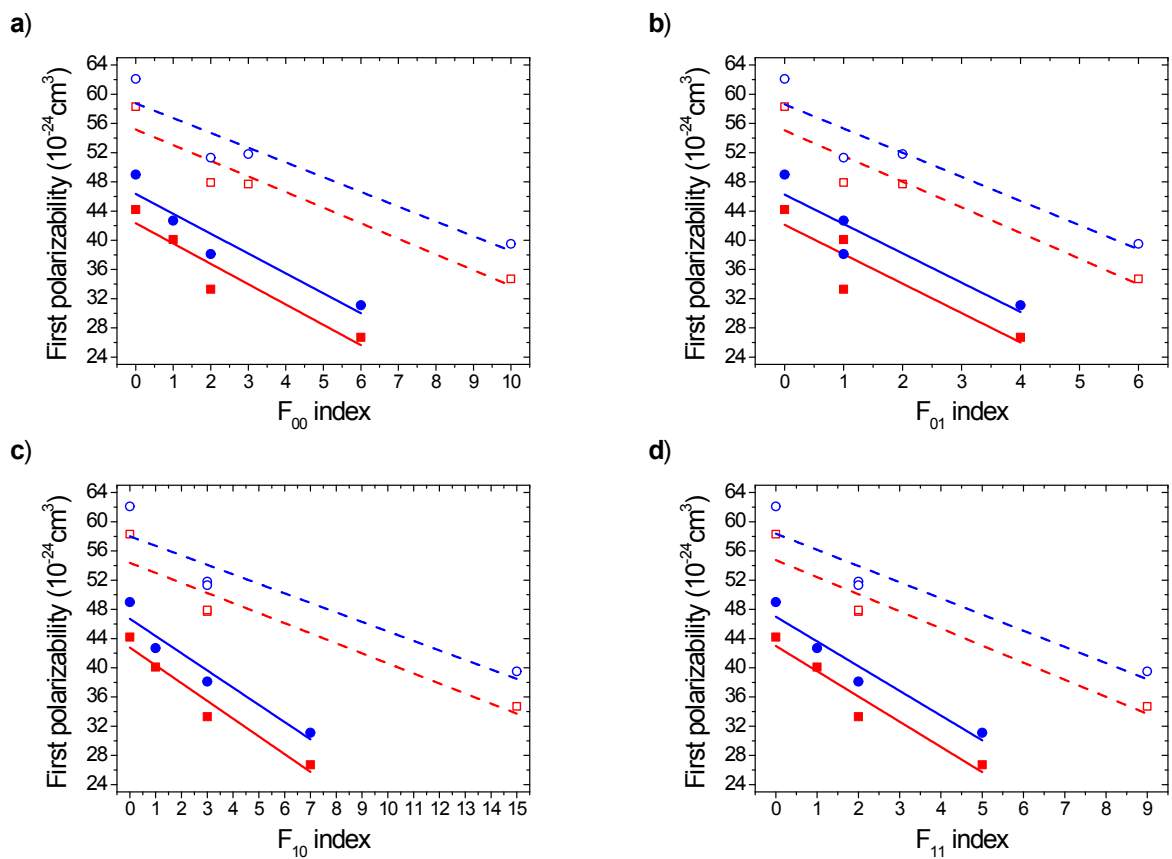

**Figure S18.** First dynamic electric polarisability (at  $\lambda = 830 \text{ nm}$ ).

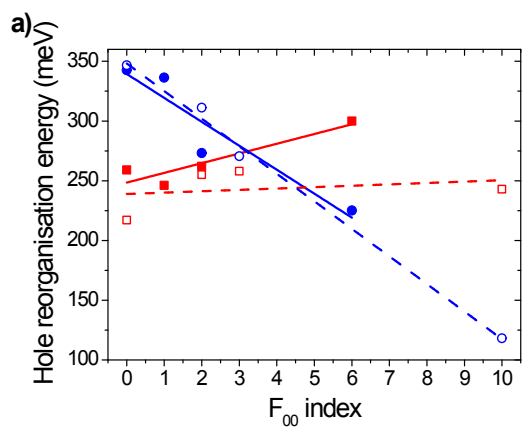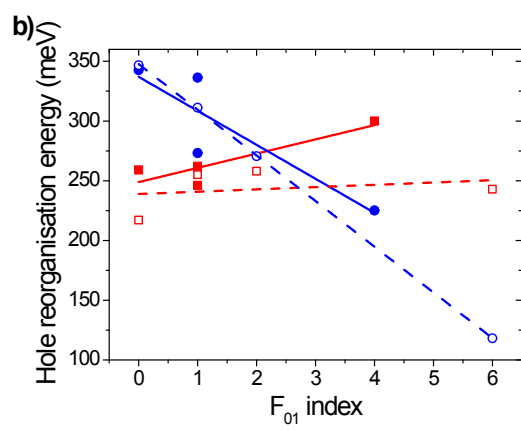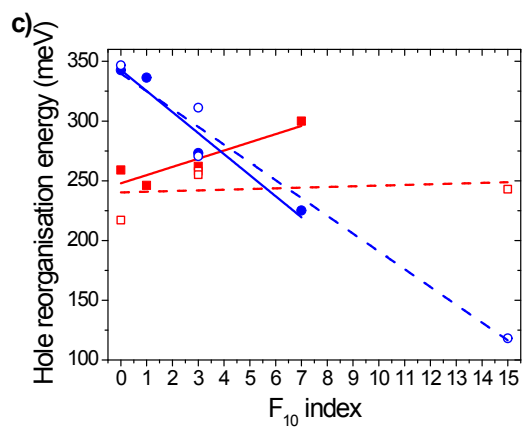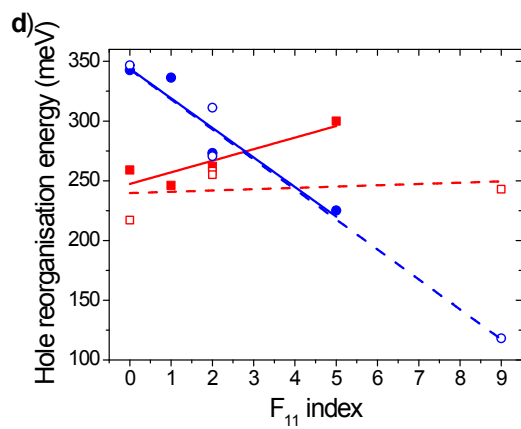

Figure S19. Hole reorganisation energy.

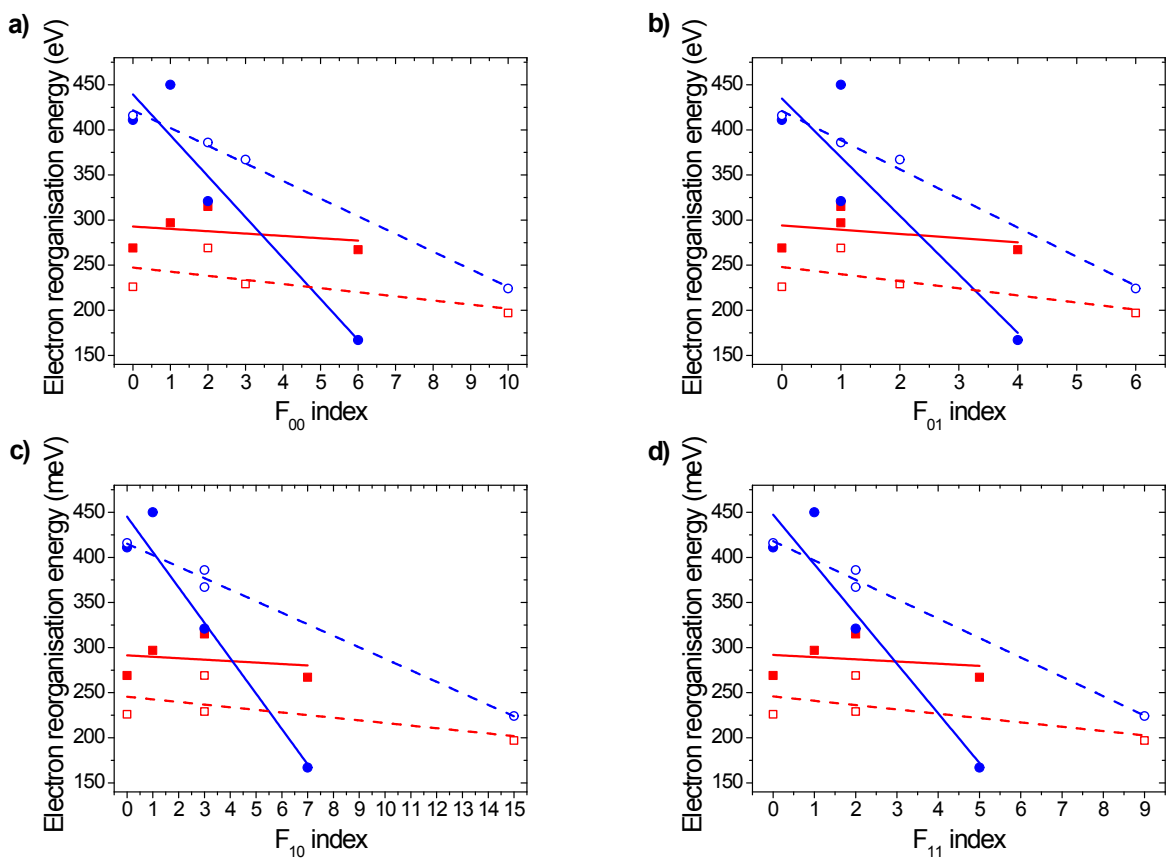

**Figure S20.** Electron reorganisation energy.

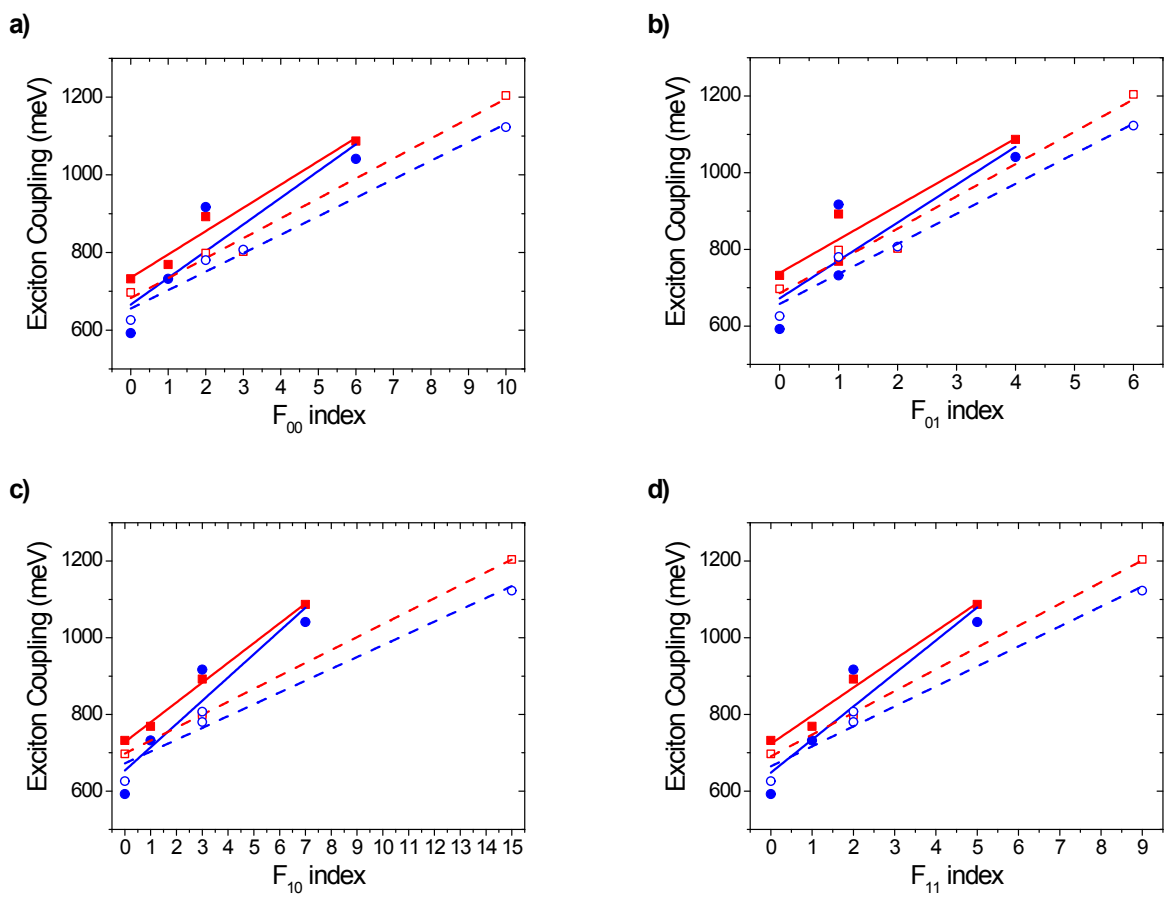

**Figure S21.** Exciton coupling (distance equal to 3.5 Å).

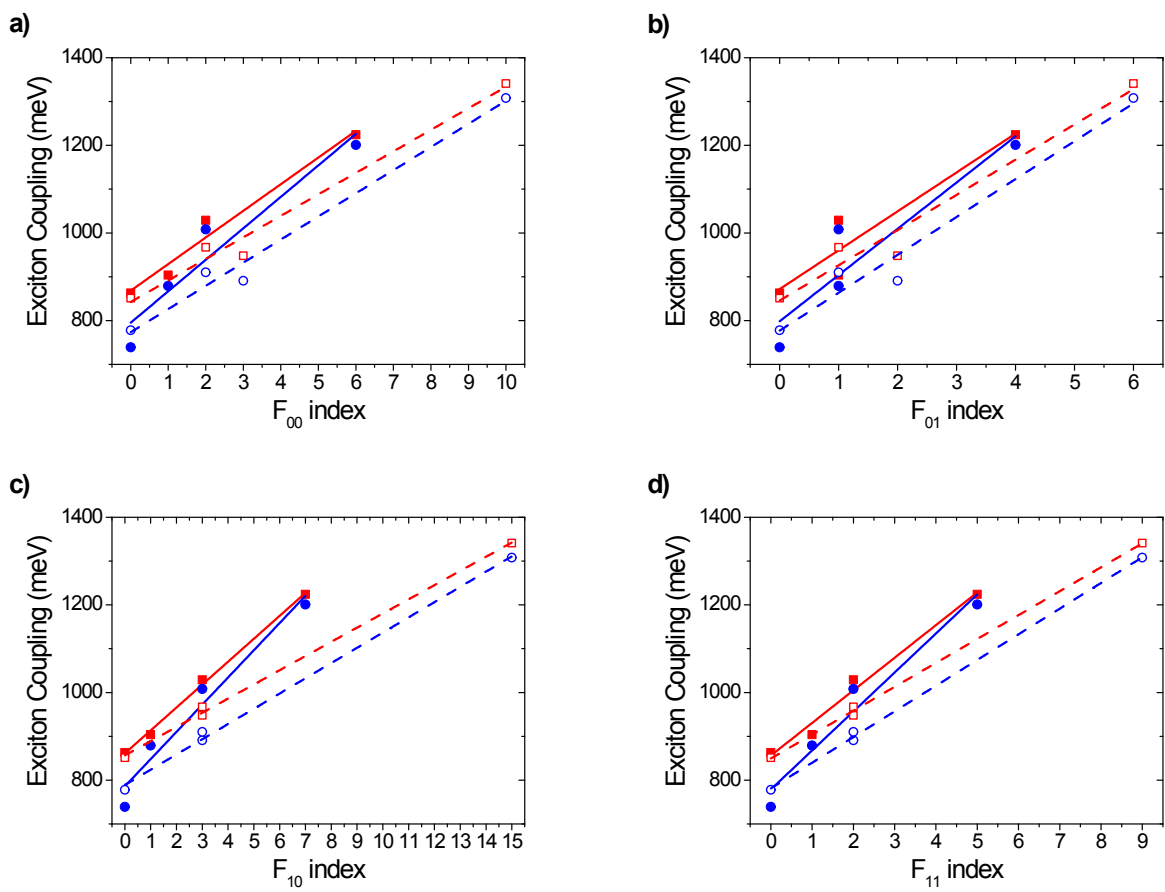

**Figure S22.** Exciton coupling (distance equal to 4.0 Å).

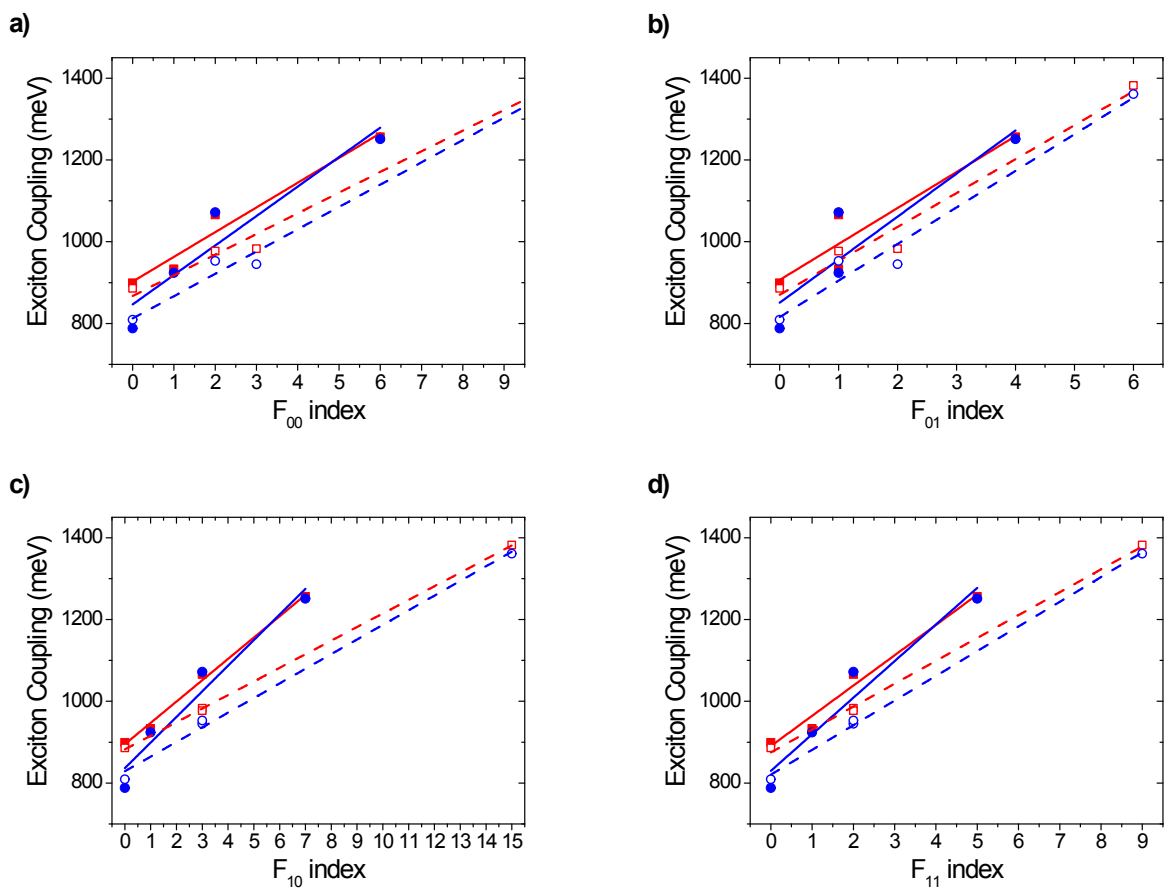

**Figure S23.** Exciton coupling (distance equal to 4.5 Å).



## 5. Atomic coordinates of optimised structures of investigated compounds

### 5.1 Neutral ground state

#### 40a compound

|   |             |             |             |
|---|-------------|-------------|-------------|
| C | 2.79905500  | -0.46414500 | -0.78060200 |
| C | 1.53007600  | -1.05373000 | -0.52849600 |
| C | 0.68337600  | -0.02423300 | -0.20808000 |
| C | 2.66096800  | 0.88893800  | -0.60159600 |
| C | -0.70383700 | 0.03462800  | 0.14261900  |
| C | -2.68142900 | -0.87854400 | 0.53613500  |
| C | -2.81951600 | 0.47454000  | 0.71514100  |
| C | -1.55053700 | 1.06412400  | 0.46303600  |
| C | -3.59595600 | -2.00478700 | 0.64274500  |
| C | 3.57549500  | 2.01518200  | -0.70820600 |
| C | -3.16293200 | -3.31707400 | 0.38993400  |
| C | -4.04709500 | -4.38610800 | 0.49510200  |
| C | -5.37704200 | -4.17156700 | 0.85310000  |
| C | -5.81708300 | -2.87140400 | 1.10638000  |
| C | -4.93926500 | -1.79965800 | 1.00316600  |
| C | 3.14247100  | 3.32746800  | -0.45539500 |
| C | 4.02663400  | 4.39650300  | -0.56056200 |
| C | 5.35658100  | 4.18196100  | -0.91856200 |
| C | 5.79662100  | 2.88179800  | -1.17184200 |
| C | 4.91880400  | 1.81005300  | -1.06862800 |
| O | -1.38271600 | -1.15063100 | 0.18439500  |
| O | 1.36225500  | 1.16102600  | -0.24985600 |
| H | 3.70265600  | -0.98123200 | -1.06009400 |
| H | 1.26779500  | -2.09784400 | -0.57494200 |
| H | -3.72311700 | 0.99162600  | 0.99463400  |
| H | -1.28825500 | 2.10823900  | 0.50948200  |
| H | -2.13171000 | -3.49173300 | 0.11135300  |
| H | -3.69447100 | -5.39202500 | 0.29610400  |
| H | -6.06370200 | -5.00625600 | 0.93429900  |
| H | -6.84934400 | -2.69236500 | 1.38575200  |
| H | -5.29739000 | -0.79664300 | 1.20360300  |
| H | 2.11124900  | 3.50212800  | -0.17681300 |
| H | 3.67401000  | 5.40241900  | -0.36156500 |
| H | 6.04324100  | 5.01665000  | -0.99976100 |
| H | 6.82888200  | 2.70275900  | -1.45121500 |
| H | 5.27692800  | 0.80703700  | -1.26906600 |

4Ob compound

|   |             |             |             |
|---|-------------|-------------|-------------|
| C | 0.98060500  | 0.97266400  | 1.08562400  |
| C | -0.01088500 | 0.04887000  | 0.68505100  |
| C | 0.01948600  | -0.05697800 | -0.67708200 |
| C | 1.56706200  | 1.38037800  | -0.09822700 |
| C | -1.55846100 | -1.38848600 | 0.10619600  |
| C | -0.97200300 | -0.98077200 | -1.07765500 |
| C | -2.63472900 | -2.32052400 | 0.39735500  |
| C | 2.64332900  | 2.31241700  | -0.38938600 |
| C | -3.04529200 | -2.55924300 | 1.72024400  |
| C | -4.07642900 | -3.45321000 | 1.98979400  |
| C | -4.71928300 | -4.12679900 | 0.95251500  |
| C | -4.31897200 | -3.89663700 | -0.36471800 |
| C | -3.29021300 | -3.00545500 | -0.64158600 |
| C | 3.05389200  | 2.55113700  | -1.71227500 |
| C | 4.08502800  | 3.44510500  | -1.98182500 |
| C | 4.72788100  | 4.11869400  | -0.94454700 |
| C | 4.32757100  | 3.88853200  | 0.37268600  |
| C | 3.29881300  | 2.99734900  | 0.64955500  |
| H | 1.24529000  | 1.30544800  | 2.07490300  |
| H | -1.23668800 | -1.31355600 | -2.06693400 |
| H | -2.55139700 | -2.04038400 | 2.53143700  |
| H | -4.37883300 | -3.62395600 | 3.01700300  |
| H | -5.52234400 | -4.82269800 | 1.16591200  |
| H | -4.81135400 | -4.41452600 | -1.18018400 |
| H | -2.99363800 | -2.83993600 | -1.67069100 |
| H | 2.55999800  | 2.03227800  | -2.52346800 |
| H | 4.38743100  | 3.61585100  | -3.00903400 |
| H | 5.53094200  | 4.81459400  | -1.15794300 |
| H | 4.81995200  | 4.40642200  | 1.18815200  |
| H | 3.00223900  | 2.83182900  | 1.67865900  |
| O | -0.97018700 | -0.75693300 | 1.19912600  |
| O | 0.97878900  | 0.74882500  | -1.19115800 |

4Oc compound

|   |           |           |           |
|---|-----------|-----------|-----------|
| C | -5.219165 | -1.345732 | 0.115834  |
| C | -6.315052 | -2.214784 | 0.222334  |
| C | -7.584796 | -1.664846 | 0.348868  |
| C | -7.780122 | -0.272656 | 0.370966  |
| C | -6.707595 | 0.610610  | 0.266773  |
| C | -5.450205 | 0.041644  | 0.141410  |
| O | -4.267161 | 0.720395  | 0.025880  |
| C | -3.280277 | -0.236793 | -0.073477 |
| C | -3.797262 | -1.498155 | -0.024902 |
| C | -1.937815 | 0.251408  | -0.205109 |
| C | -1.420831 | 1.512769  | -0.253683 |
| C | 0.001072  | 1.360346  | -0.394419 |
| C | 0.232112  | -0.027030 | -0.419997 |
| O | -0.950932 | -0.705780 | -0.304466 |
| C | 1.096959  | 2.229398  | -0.500919 |
| C | 2.366703  | 1.679460  | -0.627453 |
| C | 2.562029  | 0.287270  | -0.649552 |
| C | 1.489502  | -0.595996 | -0.545359 |
| H | -6.174977 | -3.289414 | 0.206362  |
| H | -8.444692 | -2.319382 | 0.432504  |
| H | -8.784371 | 0.122193  | 0.470961  |
| H | -6.842978 | 1.684723  | 0.282283  |
| H | -3.227366 | -2.411173 | -0.083058 |
| H | -1.990727 | 2.425788  | -0.195527 |
| H | 0.956884  | 3.304028  | -0.484946 |
| H | 3.226599  | 2.333996  | -0.711089 |
| H | 3.566278  | -0.107578 | -0.749548 |
| H | 1.624885  | -1.670108 | -0.560870 |

*4Od compound*

|   |             |             |             |
|---|-------------|-------------|-------------|
| C | 0.78416100  | 1.15978200  | -1.07577800 |
| C | -0.03474900 | 0.06117800  | -0.67687500 |
| C | 0.02198200  | -0.05116100 | 0.67823300  |
| C | 1.29053500  | 1.63652700  | 0.16374600  |
| C | -1.30330200 | -1.62651000 | -0.16238800 |
| C | -0.79692800 | -1.14976500 | 1.07713600  |
| C | -2.16117600 | -2.70761900 | -0.25645200 |
| C | -2.52421700 | -3.33309700 | 0.93589900  |
| C | -2.03835900 | -2.88227600 | 2.17353700  |
| C | -1.17644000 | -1.79501700 | 2.26039400  |
| C | 2.14840900  | 2.71763500  | 0.25781000  |
| C | 2.51145100  | 3.34311400  | -0.93454100 |
| C | 2.02559200  | 2.89229300  | -2.17217900 |
| C | 1.16367300  | 1.80503300  | -2.25903600 |
| H | -2.52882000 | -3.04547100 | -1.21726200 |
| H | -3.19467000 | -4.18375200 | 0.90428100  |
| H | -2.34270100 | -3.39382400 | 3.07920600  |
| H | -0.80552700 | -1.45265300 | 3.21863800  |
| H | 2.51605300  | 3.05548700  | 1.21862000  |
| H | 3.18190300  | 4.19376900  | -0.90292300 |
| H | 2.32993500  | 3.40384100  | -3.07784800 |
| H | 0.79276000  | 1.46267000  | -3.21728000 |
| O | -0.83949400 | -0.88841200 | -1.23867600 |
| O | 0.82672700  | 0.89842900  | 1.24003400  |

4Sa compound

|   |             |             |             |
|---|-------------|-------------|-------------|
| C | 2.62996200  | 1.05386600  | -1.04464100 |
| C | 1.44349100  | 0.38631600  | -0.65408300 |
| C | 0.39358000  | 1.23594900  | -0.38408200 |
| C | 2.51505600  | 2.42384900  | -1.07941800 |
| C | -0.95140200 | 0.91903200  | 0.04181100  |
| C | -3.13790300 | -0.24636000 | 0.54817900  |
| C | -3.10616700 | 1.07186800  | 0.93875900  |
| C | -1.88207700 | 1.72639500  | 0.65750500  |
| C | -4.22600100 | -1.21821900 | 0.69220200  |
| C | 3.53411700  | 3.41974700  | -1.42424200 |
| C | -3.97323600 | -2.59520200 | 0.80912600  |
| C | -5.01738200 | -3.50308400 | 0.95501100  |
| C | -6.33763500 | -3.05788300 | 0.99516100  |
| C | -6.60359600 | -1.69348100 | 0.88007900  |
| C | -5.56296000 | -0.78456200 | 0.72339700  |
| C | 3.50892600  | 4.71684100  | -0.88523600 |
| C | 4.48966600  | 5.64671100  | -1.21581200 |
| C | 5.52263500  | 5.30207500  | -2.08592300 |
| C | 5.56031300  | 4.01779600  | -2.62884000 |
| C | 4.57569100  | 3.08950100  | -2.30886500 |
| S | -1.61962600 | -0.68134500 | -0.21184600 |
| S | 0.88567400  | 2.89840300  | -0.64137100 |
| H | 3.55777400  | 0.53917400  | -1.25690700 |
| H | 1.37120900  | -0.68798100 | -0.54361300 |
| H | -3.92998100 | 1.54972300  | 1.45235700  |
| H | -1.67831400 | 2.75432600  | 0.92839900  |
| H | -2.95027800 | -2.95443200 | 0.80629900  |
| H | -4.79748400 | -4.56088000 | 1.04651000  |
| H | -7.15034800 | -3.76557200 | 1.11146300  |
| H | -7.62729900 | -1.33640100 | 0.89914700  |
| H | -5.78566800 | 0.26899900  | 0.60229800  |
| H | 2.72689300  | 4.99171400  | -0.18640200 |
| H | 4.45104400  | 6.64088400  | -0.78478100 |
| H | 6.28773700  | 6.02627400  | -2.34088300 |
| H | 6.35299700  | 3.74158400  | -3.31527900 |
| H | 4.59878000  | 2.10602400  | -2.76328900 |

4Sb compound

|   |             |             |             |
|---|-------------|-------------|-------------|
| C | 1.50108500  | 0.68835100  | 0.76029800  |
| C | 0.34132500  | -0.11065500 | 0.59341400  |
| C | -0.33803600 | 0.10610500  | -0.59804500 |
| C | 1.71125200  | 1.52905700  | -0.30681100 |
| C | -1.70796300 | -1.53360700 | 0.30218100  |
| C | -1.49779500 | -0.69290200 | -0.76492800 |
| C | -2.79407800 | -2.50162300 | 0.48863400  |
| C | 2.79736600  | 2.49707300  | -0.49326300 |
| C | -3.26394500 | -2.84046300 | 1.76833600  |
| C | -4.30208300 | -3.75283100 | 1.92903500  |
| C | -4.90072600 | -4.34201500 | 0.81672400  |
| C | -4.44412700 | -4.01515300 | -0.46001600 |
| C | -3.39899700 | -3.11252300 | -0.62354000 |
| C | 3.40228300  | 3.10797600  | 0.61891100  |
| C | 4.44741300  | 4.01060700  | 0.45538700  |
| C | 4.90401400  | 4.33746600  | -0.82135200 |
| C | 4.30537400  | 3.74828000  | -1.93366300 |
| C | 3.26723600  | 2.83591200  | -1.77296500 |
| H | 2.17089300  | 0.63234300  | 1.60707200  |
| H | -2.16760300 | -0.63689300 | -1.61170200 |
| H | -2.82652200 | -2.37036300 | 2.64187200  |
| H | -4.65007100 | -3.99663000 | 2.92657300  |
| H | -5.71117100 | -5.05063300 | 0.94279400  |
| H | -4.89437100 | -4.47590800 | -1.33225000 |
| H | -3.03101100 | -2.89377400 | -1.61906900 |
| H | 3.03429500  | 2.88922800  | 1.61444000  |
| H | 4.89765500  | 4.47136300  | 1.32762200  |
| H | 5.71445900  | 5.04608500  | -0.94742200 |
| H | 4.65336400  | 3.99207800  | -2.93120100 |
| H | 2.82981500  | 2.36581000  | -2.64650100 |
| S | -0.45111600 | -1.34426500 | 1.53453800  |
| S | 0.45440600  | 1.33971400  | -1.53916900 |

4Sc compound

|   |             |             |             |
|---|-------------|-------------|-------------|
| C | -5.41557500 | -1.12759900 | 0.18141400  |
| C | -6.39884900 | -2.11124500 | 0.39059600  |
| C | -7.73225100 | -1.74148600 | 0.46595500  |
| C | -8.11290500 | -0.39509100 | 0.33687100  |
| C | -7.16222000 | 0.59715200  | 0.13124500  |
| C | -5.81995900 | 0.22289700  | 0.05562000  |
| S | -4.44043900 | 1.27493800  | -0.20494800 |
| C | -3.32688900 | -0.10007300 | -0.12272800 |
| C | -3.99401900 | -1.27590600 | 0.07685700  |
| C | -1.90174700 | 0.11473700  | -0.26294300 |
| C | -1.20800800 | 1.29001000  | -0.19267400 |
| C | 0.20646300  | 1.14193600  | -0.36897700 |
| C | 0.57792400  | -0.20782100 | -0.57722700 |
| S | -0.82630500 | -1.25940300 | -0.56722600 |
| C | 1.21197700  | 2.12519000  | -0.35237700 |
| C | 2.53416400  | 1.75578000  | -0.54136500 |
| C | 2.88171700  | 0.41012900  | -0.74818300 |
| C | 1.90886100  | -0.58173200 | -0.76763200 |
| H | -6.10870000 | -3.15129100 | 0.49172700  |
| H | -8.49222200 | -2.49748100 | 0.62639900  |
| H | -9.16082900 | -0.12509900 | 0.39829900  |
| H | -7.45861300 | 1.63486800  | 0.03280500  |
| H | -3.49021000 | -2.23015400 | 0.16493700  |
| H | -1.68449200 | 2.24363500  | -0.00364800 |
| H | 0.94760000  | 3.16467000  | -0.19206700 |
| H | 3.31108000  | 2.51149100  | -0.52988500 |
| H | 3.92127600  | 0.14043000  | -0.89445400 |
| H | 2.17986900  | -1.61888300 | -0.92659000 |

*4Sd compound*

|   |             |             |             |
|---|-------------|-------------|-------------|
| C | 0.88287600  | 1.26081800  | -0.98992200 |
| C | 0.04107800  | 0.14397400  | -0.67070800 |
| C | -0.04109500 | -0.14396600 | 0.67070800  |
| C | 1.44045100  | 1.81020500  | 0.19317500  |
| C | -1.44046700 | -1.81019700 | -0.19317500 |
| C | -0.88289300 | -1.26080900 | 0.98992200  |
| C | -2.29755500 | -2.90914400 | -0.14802800 |
| C | -2.60118400 | -3.46517400 | 1.08936200  |
| C | -2.05762900 | -2.93312800 | 2.26886800  |
| C | -1.20489300 | -1.84021500 | 2.22712300  |
| C | 2.29753800  | 2.90915300  | 0.14802800  |
| C | 2.60116700  | 3.46518300  | -1.08936200 |
| C | 2.05761200  | 2.93313600  | -2.26886800 |
| C | 1.20487700  | 1.84022400  | -2.22712300 |
| H | -2.71882800 | -3.32213100 | -1.05718700 |
| H | -3.26582400 | -4.31967000 | 1.14127300  |
| H | -2.30786400 | -3.38237500 | 3.22288200  |
| H | -0.78788200 | -1.43333500 | 3.14152700  |
| H | 2.71881100  | 3.32214000  | 1.05718700  |
| H | 3.26580700  | 4.31967900  | -1.14127300 |
| H | 2.30784700  | 3.38238300  | -3.22288200 |
| H | 0.78786500  | 1.43334400  | -3.14152700 |
| S | -0.92151500 | -0.94980300 | -1.64837600 |
| S | 0.92149900  | 0.94981200  | 1.64837600  |



50a compound

|   |             |             |             |
|---|-------------|-------------|-------------|
| C | 0.54146700  | 1.20579100  | 0.45462800  |
| C | -0.74991600 | 1.16715000  | -0.04457200 |
| C | -1.31645100 | -0.03962700 | -0.49258900 |
| C | -0.53034100 | -1.20244400 | -0.41706200 |
| C | 0.76104100  | -1.16380300 | 0.08213900  |
| C | 1.32757700  | 0.04297500  | 0.53015600  |
| C | -2.66882000 | -0.08979000 | -1.01725800 |
| C | 2.67994600  | 0.09313800  | 1.05482400  |
| C | -3.45594300 | -1.10019600 | -1.51049800 |
| C | -4.69993700 | -0.51703200 | -1.87269000 |
| C | -4.61443800 | 0.82122300  | -1.58389900 |
| C | 3.46706900  | 1.10354400  | 1.54806600  |
| C | 4.71106200  | 0.52038000  | 1.91025700  |
| C | 4.62556400  | -0.81787600 | 1.62146500  |
| C | -5.53686000 | 1.93825000  | -1.72157100 |
| C | 5.54798600  | -1.93490200 | 1.75913500  |
| C | -5.16610100 | 3.23717100  | -1.33610100 |
| C | -6.05674700 | 4.29724600  | -1.47283100 |
| C | -7.33192200 | 4.08675700  | -1.99489600 |
| C | -7.71015600 | 2.79985900  | -2.38082700 |
| C | -6.82532300 | 1.73726900  | -2.24668900 |
| C | 5.17722900  | -3.23382200 | 1.37366100  |
| C | 6.06787500  | -4.29389700 | 1.51039000  |
| C | 7.34304900  | -4.08340900 | 2.03245800  |
| C | 7.72128100  | -2.79651100 | 2.41839400  |
| C | 6.83644800  | -1.73392100 | 2.28425700  |
| O | -3.37556300 | 1.08310700  | -1.06191200 |
| O | 3.38668900  | -1.07975900 | 1.09947800  |
| H | 0.94609000  | 2.15318200  | 0.79115300  |
| H | -1.33339800 | 2.07750200  | -0.09144500 |
| H | -0.93496500 | -2.14983400 | -0.75358700 |
| H | 1.34452300  | -2.07415400 | 0.12901100  |
| H | -3.18010700 | -2.13806100 | -1.60412600 |
| H | -5.55073200 | -1.02707700 | -2.29459500 |
| H | 3.19123200  | 2.14140900  | 1.64169500  |
| H | 5.56185800  | 1.03042500  | 2.33216300  |
| H | -4.17764300 | 3.40887400  | -0.92997100 |
| H | -5.75230500 | 5.29287900  | -1.16975100 |
| H | -8.02386100 | 4.91435000  | -2.10038800 |
| H | -8.69954000 | 2.62403100  | -2.78810900 |
| H | -7.13538600 | 0.74442400  | -2.55101100 |
| H | 4.18877200  | -3.40552500 | 0.96752900  |
| H | 5.76343500  | -5.28952900 | 1.20730600  |
| H | 8.03498900  | -4.91100200 | 2.13795000  |
| H | 8.71066500  | -2.62068400 | 2.82567800  |
| H | 7.14651000  | -0.74107700 | 2.58858200  |

50b compound

|   |             |             |             |
|---|-------------|-------------|-------------|
| C | 0.48079900  | -1.29852600 | 0.18557000  |
| C | -0.26913700 | -0.14179700 | -0.06940300 |
| C | 0.38343800  | 1.10682100  | -0.22556800 |
| C | 1.74911100  | 1.29949400  | -0.14658400 |
| C | 2.49904700  | 0.14276500  | 0.10838900  |
| C | 1.84647200  | -1.10585200 | 0.26455400  |
| C | 3.89690400  | -0.13867200 | 0.26947400  |
| C | 4.01487000  | -1.47845400 | 0.50366500  |
| O | 2.77381400  | -2.08459800 | 0.50419600  |
| C | -1.66699400 | 0.13964100  | -0.23048900 |
| C | -1.78495900 | 1.47942300  | -0.46468000 |
| O | -0.54390400 | 2.08556600  | -0.46521100 |
| C | 5.16161000  | -2.34479300 | 0.74267900  |
| C | -2.93170000 | 2.34576100  | -0.70369500 |
| C | 4.98941300  | -3.72095500 | 0.96231300  |
| C | 6.08926000  | -4.54256000 | 1.19032000  |
| C | 7.37724100  | -4.01073400 | 1.20380300  |
| C | 7.55842500  | -2.64369100 | 0.98637000  |
| C | 6.46466500  | -1.81853200 | 0.75823900  |
| C | -2.75950200 | 3.72192400  | -0.92332600 |
| C | -3.85934900 | 4.54352800  | -1.15133500 |
| C | -5.14733100 | 4.01170200  | -1.16482100 |
| C | -5.32851400 | 2.64465800  | -0.94739000 |
| C | -4.23475500 | 1.81950000  | -0.71925800 |
| H | 0.03012700  | -2.27442400 | 0.31242400  |
| H | 2.19978300  | 2.27539300  | -0.27343800 |
| H | 4.70755000  | 0.57008500  | 0.21698900  |
| H | -2.47764000 | -0.56911600 | -0.17800400 |
| H | 3.99108500  | -4.13849800 | 0.95288000  |
| H | 5.93823200  | -5.60305400 | 1.35814700  |
| H | 8.23229100  | -4.65277100 | 1.38162200  |
| H | 8.55644800  | -2.22015200 | 0.99481300  |
| H | 6.62203100  | -0.75950300 | 0.59105300  |
| H | -1.76117500 | 4.13946800  | -0.91389200 |
| H | -3.70832200 | 5.60402300  | -1.31916100 |
| H | -6.00238100 | 4.65373900  | -1.34264100 |
| H | -6.32653700 | 2.22111900  | -0.95583600 |
| H | -4.39212100 | 0.76047000  | -0.55207400 |

50c compound

|   |             |             |             |
|---|-------------|-------------|-------------|
| C | -5.53528800 | -1.64671800 | 1.38236000  |
| C | -5.65808100 | -0.24694300 | 1.33746100  |
| C | -6.82579600 | 0.43345800  | 1.64552400  |
| C | -7.91907100 | -0.34651900 | 2.01651100  |
| C | -7.83025600 | -1.74871700 | 2.07173400  |
| C | -6.64954300 | -2.41122200 | 1.75870700  |
| C | -4.18042700 | -1.92382200 | 0.99513700  |
| C | -3.58298000 | -0.72059700 | 0.74730200  |
| O | -4.47409600 | 0.31618300  | 0.95224900  |
| C | -2.24139300 | -0.34934100 | 0.32662700  |
| C | -1.88667300 | 0.99875500  | 0.14452600  |
| C | -0.60732300 | 1.34806100  | -0.25604800 |
| C | 0.37131900  | 0.36846700  | -0.49180200 |
| C | 0.01659900  | -0.97962800 | -0.30970000 |
| C | -1.26275100 | -1.32893400 | 0.09087400  |
| C | 1.71290700  | 0.73972400  | -0.91247600 |
| O | 2.60402100  | -0.29705700 | -1.11742800 |
| C | 3.78800700  | 0.26606900  | -1.50263800 |
| C | 3.66521500  | 1.66584500  | -1.54753000 |
| C | 2.31035500  | 1.94294900  | -1.16030500 |
| C | 4.95572000  | -0.41433200 | -1.81070500 |
| C | 6.04899600  | 0.36564500  | -2.18168900 |
| C | 5.96018300  | 1.76784400  | -2.23690500 |
| C | 4.77947100  | 2.43034900  | -1.92387400 |
| H | -6.87967100 | 1.51390100  | 1.59865200  |
| H | -8.85567600 | 0.13762000  | 2.26720900  |
| H | -8.70273300 | -2.32122900 | 2.36490800  |
| H | -6.59200200 | -3.49268100 | 1.80456900  |
| H | -3.71488900 | -2.89279400 | 0.91305600  |
| H | -2.62483000 | 1.77014300  | 0.32057300  |
| H | -0.36571100 | 2.39615400  | -0.38729000 |
| H | 0.75475600  | -1.75101700 | -0.48574800 |
| H | -1.50436300 | -2.37702700 | 0.22211500  |
| H | 1.84481900  | 2.91192100  | -1.07821900 |
| H | 5.00959400  | -1.49477500 | -1.76383900 |
| H | 6.98560000  | -0.11849500 | -2.43239000 |
| H | 6.83266100  | 2.34035600  | -2.53007600 |
| H | 4.72193100  | 3.51180800  | -1.96973100 |

50d compound

|   |             |             |             |
|---|-------------|-------------|-------------|
| C | 0.76577300  | 1.30976000  | 0.31492500  |
| C | 1.60357200  | 0.20720600  | 0.11949400  |
| C | 1.05148800  | -1.06531200 | -0.15833300 |
| C | -0.30344000 | -1.32152000 | -0.25707200 |
| C | -1.14123900 | -0.21896600 | -0.06164100 |
| C | -0.58915500 | 1.05355200  | 0.21618600  |
| C | -2.57729600 | -0.02008300 | -0.07056800 |
| C | -2.77180000 | 1.34539400  | 0.20052000  |
| O | -1.57703000 | 2.00179300  | 0.37512300  |
| C | 3.03963000  | 0.00832300  | 0.12842100  |
| C | 3.23413300  | -1.35715400 | -0.14266700 |
| O | 2.03936300  | -2.01355300 | -0.31726900 |
| C | -3.69347200 | -0.83716500 | -0.27522400 |
| C | -4.96020400 | -0.26575200 | -0.20262200 |
| C | -5.12233500 | 1.10115300  | 0.06987600  |
| C | -4.02367500 | 1.93418300  | 0.27719700  |
| C | 4.15580500  | 0.82540500  | 0.33307700  |
| C | 5.42253700  | 0.25399200  | 0.26047600  |
| C | 5.58466800  | -1.11291300 | -0.01202300 |
| C | 4.48600800  | -1.94594300 | -0.21934400 |
| H | 1.14218300  | 2.30162400  | 0.52965800  |
| H | -0.67985000 | -2.31338400 | -0.47180500 |
| H | -3.57723900 | -1.89406900 | -0.48622700 |
| H | -5.83661900 | -0.88378700 | -0.35854100 |
| H | -6.12089800 | 1.51948800  | 0.12059700  |
| H | -4.13518300 | 2.99021800  | 0.48821100  |
| H | 4.03957200  | 1.88230900  | 0.54408000  |
| H | 6.29895200  | 0.87202700  | 0.41639400  |
| H | 6.58323200  | -1.53124800 | -0.06274400 |
| H | 4.59751600  | -3.00197800 | -0.43035800 |

5Sa compound

|   |             |             |             |
|---|-------------|-------------|-------------|
| C | 0.90828100  | 1.40940600  | -0.21299400 |
| C | -0.31021300 | 1.47437600  | -0.87151900 |
| C | -0.97010500 | 0.31122600  | -1.30398700 |
| C | -0.35002900 | -0.92181000 | -1.03778800 |
| C | 0.86846500  | -0.98678000 | -0.37926400 |
| C | 1.52835600  | 0.17637000  | 0.05320500  |
| C | -2.24874300 | 0.36448600  | -2.01370400 |
| C | 2.80699500  | 0.12311000  | 0.76292200  |
| C | -2.77880700 | -0.54566200 | -2.89925200 |
| C | -4.05021300 | -0.17917300 | -3.40644600 |
| C | -4.51951600 | 1.01865100  | -2.92031400 |
| C | 3.33705900  | 1.03325800  | 1.64847000  |
| C | 4.60846500  | 0.66676900  | 2.15566400  |
| C | 5.07776800  | -0.53105500 | 1.66953200  |
| C | -5.78190800 | 1.69930200  | -3.22711900 |
| C | 6.34015900  | -1.21170600 | 1.97633700  |
| C | -5.89823300 | 3.09790600  | -3.16714400 |
| C | -7.10065200 | 3.72829200  | -3.47154200 |
| C | -8.21295300 | 2.97850200  | -3.85045000 |
| C | -8.11214400 | 1.58885600  | -3.91423000 |
| C | -6.91477700 | 0.95524800  | -3.59991100 |
| C | 6.45648500  | -2.61031000 | 1.91636200  |
| C | 7.65890300  | -3.24069600 | 2.22076000  |
| C | 8.77120400  | -2.49090600 | 2.59966800  |
| C | 8.67039600  | -1.10126000 | 2.66344800  |
| C | 7.47302800  | -0.46765200 | 2.34912900  |
| S | -3.36294100 | 1.69847700  | -1.79545900 |
| S | 3.92119300  | -1.21088100 | 0.54467700  |
| H | 1.40275100  | 2.33000600  | 0.07343200  |
| H | -0.74258200 | 2.44601900  | -1.08252900 |
| H | -0.84450000 | -1.84241000 | -1.32421400 |
| H | 1.30083300  | -1.95842200 | -0.16825300 |
| H | -2.25086900 | -1.43799800 | -3.20906700 |
| H | -4.58817000 | -0.76363800 | -4.14133800 |
| H | 2.80912000  | 1.92559400  | 1.95828500  |
| H | 5.14642100  | 1.25123400  | 2.89055600  |
| H | -5.03460600 | 3.69630400  | -2.89966700 |
| H | -7.16557200 | 4.80946200  | -3.42116600 |
| H | -9.14854500 | 3.47053700  | -4.09013200 |
| H | -8.97372300 | 0.99441400  | -4.19739700 |
| H | -6.85923800 | -0.12674800 | -3.62204900 |
| H | 5.59285800  | -3.20870700 | 1.64888500  |
| H | 7.72382300  | -4.32186600 | 2.17038400  |
| H | 9.70679700  | -2.98294100 | 2.83935000  |
| H | 9.53197500  | -0.50681800 | 2.94661600  |
| H | 7.41748900  | 0.61434400  | 2.37126700  |

5Sb compound

|   |             |             |             |
|---|-------------|-------------|-------------|
| C | -0.97650000 | -0.09389300 | -0.96827600 |
| C | -1.34104100 | -0.10225800 | 0.40914300  |
| C | -0.34198500 | -0.00349500 | 1.38730600  |
| C | 0.97649500  | 0.09388800  | 0.96825500  |
| C | 1.34103600  | 0.10225300  | -0.40916400 |
| C | 0.34197900  | 0.00348900  | -1.38732700 |
| C | 3.46718800  | 0.28208700  | 0.57767100  |
| C | 2.76057800  | 0.20783500  | -0.58631900 |
| C | -3.46719400 | -0.28209200 | -0.57769300 |
| C | -2.76058300 | -0.20784000 | 0.58629800  |
| C | 4.92053400  | 0.39689900  | 0.74957300  |
| C | -4.92053900 | -0.39690400 | -0.74959400 |
| C | 5.56639100  | -0.11638800 | 1.88580600  |
| C | 6.94691100  | -0.01460900 | 2.02839100  |
| C | 7.71308900  | 0.59977600  | 1.03957200  |
| C | 7.08396600  | 1.11817000  | -0.09233200 |
| C | 5.70391600  | 1.02415500  | -0.23419200 |
| C | -5.56639700 | 0.11638300  | -1.88582700 |
| C | -6.94691700 | 0.01460400  | -2.02841300 |
| C | -7.71309400 | -0.59978100 | -1.03959300 |
| C | -7.08397200 | -1.11817500 | 0.09231100  |
| C | -5.70392200 | -1.02416000 | 0.23417100  |
| H | -0.60174400 | -0.00620900 | 2.43971100  |
| H | 0.60173800  | 0.00620400  | -2.43973200 |
| H | 3.23404300  | 0.19751400  | -1.55963600 |
| H | -3.23404800 | -0.19751900 | 1.55961500  |
| H | 4.98548600  | -0.61581600 | 2.65287700  |
| H | 7.42510700  | -0.42196200 | 2.91208100  |
| H | 8.78837100  | 0.67869900  | 1.15132600  |
| H | 7.66909700  | 1.60914600  | -0.86193900 |
| H | 5.22340800  | 1.45855500  | -1.10285800 |
| H | -4.98549100 | 0.61581100  | -2.65289800 |
| H | -7.42511200 | 0.42195700  | -2.91210200 |
| H | -8.78837700 | -0.67870400 | -1.15134700 |
| H | -7.66910300 | -1.60915100 | 0.86191800  |
| H | -5.22341300 | -1.45856000 | 1.10283700  |
| S | 2.39960600  | 0.22987100  | 1.99100400  |
| S | -2.39961200 | -0.22987600 | -1.99102500 |

5Sc compound

|   |             |             |             |
|---|-------------|-------------|-------------|
| C | -5.62407500 | -1.29408400 | 1.63748600  |
| C | -6.17686100 | -0.11565200 | 1.08199400  |
| C | -7.53008000 | 0.19766200  | 1.22249700  |
| C | -8.34002400 | -0.67964100 | 1.93228900  |
| C | -7.80979300 | -1.85294600 | 2.49573700  |
| C | -6.46655600 | -2.16271100 | 2.35463400  |
| C | -4.21957300 | -1.40694700 | 1.37077900  |
| C | -3.70510600 | -0.37242900 | 0.64341800  |
| S | -4.95428200 | 0.81491700  | 0.23762700  |
| C | -2.32134400 | -0.17592100 | 0.20159400  |
| C | -1.79505700 | 1.10509400  | -0.03340300 |
| C | -0.48116500 | 1.27880900  | -0.44218200 |
| C | 0.37528300  | 0.18013400  | -0.62221300 |
| C | -0.15353700 | -1.10137300 | -0.39575800 |
| C | -1.47145300 | -1.27586200 | -0.00046300 |
| C | 1.76910400  | 0.37869000  | -1.03020300 |
| S | 2.63117000  | -0.88267700 | -1.92498500 |
| C | 4.08664200  | 0.09273100  | -1.98679000 |
| C | 3.88980300  | 1.33929000  | -1.34632600 |
| C | 2.56438900  | 1.46713900  | -0.81394700 |
| C | 5.30650300  | -0.24595100 | -2.57529700 |
| C | 6.34468100  | 0.67514000  | -2.51824200 |
| C | 6.17127000  | 1.91668700  | -1.88281800 |
| C | 4.95953100  | 2.25150100  | -1.29995100 |
| H | -7.94074600 | 1.10272900  | 0.79038500  |
| H | -9.39343500 | -0.45460000 | 2.05291100  |
| H | -8.46143500 | -2.52156500 | 3.04643900  |
| H | -6.06153000 | -3.06890300 | 2.79179900  |
| H | -3.61330900 | -2.22383800 | 1.74045200  |
| H | -2.42150400 | 1.97795700  | 0.11139300  |
| H | -0.11670300 | 2.28008300  | -0.63828300 |
| H | 0.47746400  | -1.97334900 | -0.52532400 |
| H | -1.85226900 | -2.28030400 | 0.14065400  |
| H | 2.23267100  | 2.33657000  | -0.26114500 |
| H | 5.44303800  | -1.20347000 | -3.06420400 |
| H | 7.29983600  | 0.43140300  | -2.96894900 |
| H | 6.99660700  | 2.61861100  | -1.84990200 |
| H | 4.83045000  | 3.21047800  | -0.81000700 |

*5Sd compound*

|   |             |             |             |
|---|-------------|-------------|-------------|
| C | 1.27510000  | 0.05301300  | 0.58811700  |
| C | 2.67553100  | 0.05312600  | 0.97727300  |
| C | 3.53031500  | -0.24575400 | -0.10485100 |
| C | 1.10373100  | -0.24775600 | -0.78724300 |
| C | -0.15059500 | -0.30309700 | -1.37990900 |
| C | -1.27510000 | -0.05301300 | -0.58811700 |
| C | -1.10373100 | 0.24775600  | 0.78724300  |
| C | 0.15059500  | 0.30309700  | 1.37990900  |
| C | 3.24166400  | 0.30249600  | 2.23508700  |
| C | 4.61975900  | 0.25228000  | 2.39567600  |
| C | 5.45274500  | -0.04637800 | 1.30846200  |
| C | 4.91544000  | -0.29751000 | 0.05091000  |
| C | -2.67553100 | -0.05312600 | -0.97727300 |
| C | -3.53031500 | 0.24575400  | 0.10485100  |
| C | -3.24166400 | -0.30249600 | -2.23508700 |
| C | -4.61975900 | -0.25228000 | -2.39567600 |
| C | -5.45274500 | 0.04637800  | -1.30846200 |
| C | -4.91544000 | 0.29751000  | -0.05091000 |
| H | -0.25787400 | -0.53491400 | -2.43305800 |
| H | 0.25787400  | 0.53491400  | 2.43305800  |
| H | 2.60527200  | 0.53429200  | 3.08187400  |
| H | 5.05583600  | 0.44533500  | 3.36885500  |
| H | 6.52722300  | -0.08254000 | 1.44682800  |
| H | 5.56061600  | -0.52823700 | -0.78866900 |
| H | -2.60527200 | -0.53429200 | -3.08187400 |
| H | -5.05583600 | -0.44533500 | -3.36885500 |
| H | -6.52722300 | 0.08254000  | -1.44682800 |
| H | -5.56061600 | 0.52823700  | 0.78866900  |
| S | 2.64496100  | -0.53022500 | -1.60641600 |
| S | -2.64496100 | 0.53022500  | 1.60641600  |



## 5.2 Cationic ground state

### 40a compound

|   |             |             |             |
|---|-------------|-------------|-------------|
| C | 2.77994500  | -0.45663500 | -0.77792800 |
| C | 1.54325700  | -1.04497600 | -0.53347400 |
| C | 0.66587800  | -0.00702800 | -0.20247300 |
| C | 2.63051700  | 0.92282000  | -0.59131200 |
| C | -0.68633900 | 0.01742300  | 0.13701200  |
| C | -2.65097800 | -0.91242600 | 0.52585100  |
| C | -2.80040700 | 0.46702900  | 0.71246700  |
| C | -1.56371800 | 1.05537100  | 0.46801300  |
| C | -3.56223000 | -2.01226000 | 0.63390100  |
| C | 3.54176800  | 2.02265500  | -0.69936200 |
| C | -3.13393500 | -3.33240900 | 0.38298700  |
| C | -4.02908100 | -4.38330300 | 0.49244000  |
| C | -5.35737400 | -4.13966100 | 0.85126200  |
| C | -5.79171000 | -2.83544500 | 1.10195900  |
| C | -4.90583100 | -1.77708300 | 0.99558300  |
| C | 3.11347400  | 3.34280300  | -0.44844800 |
| C | 4.00862000  | 4.39369800  | -0.55790100 |
| C | 5.33691300  | 4.15005500  | -0.91672300 |
| C | 5.77124800  | 2.84583900  | -1.16742000 |
| C | 4.88537000  | 1.78747700  | -1.06104400 |
| O | -1.35924900 | -1.17338300 | 0.17569000  |
| O | 1.33878800  | 1.18377700  | -0.24115100 |
| H | 3.69009700  | -0.95962200 | -1.05914500 |
| H | 1.28556100  | -2.09038900 | -0.58241900 |
| H | -3.71055800 | 0.97001600  | 0.99368400  |
| H | -1.30602200 | 2.10078400  | 0.51695800  |
| H | -2.10508600 | -3.51767000 | 0.10544300  |
| H | -3.69775600 | -5.39588100 | 0.29926000  |
| H | -6.05362400 | -4.96513500 | 0.93554100  |
| H | -6.82167200 | -2.65062100 | 1.37977500  |
| H | -5.24925300 | -0.76932500 | 1.19132600  |
| H | 2.08462500  | 3.52806400  | -0.17090400 |
| H | 3.67729500  | 5.40627500  | -0.36472100 |
| H | 6.03316300  | 4.97553000  | -1.00100200 |
| H | 6.80121100  | 2.66101600  | -1.44523600 |
| H | 5.22879200  | 0.77971900  | -1.25678700 |

4Ob compound

|   |             |             |             |
|---|-------------|-------------|-------------|
| C | 0.96623900  | 0.95908700  | 1.08805400  |
| C | -0.00481500 | 0.05544400  | 0.70239400  |
| C | 0.01341500  | -0.06355000 | -0.69442500 |
| C | 1.56040900  | 1.37164700  | -0.12563700 |
| C | -1.55180900 | -1.37975300 | 0.13360600  |
| C | -0.95763900 | -0.96719400 | -1.08008500 |
| C | -2.60823800 | -2.29552300 | 0.41074700  |
| C | 2.61683800  | 2.28741700  | -0.40277800 |
| C | -3.02096400 | -2.53513400 | 1.74147800  |
| C | -4.04783100 | -3.42691200 | 1.99517100  |
| C | -4.67826100 | -4.09156800 | 0.93915400  |
| C | -4.27797000 | -3.86203100 | -0.38141700 |
| C | -3.25336800 | -2.97367000 | -0.64959600 |
| C | 3.02956400  | 2.52702700  | -1.73350900 |
| C | 4.05643200  | 3.41880500  | -1.98720200 |
| C | 4.68686100  | 4.08346200  | -0.93118500 |
| C | 4.28657000  | 3.85392500  | 0.38938600  |
| C | 3.26196800  | 2.96556400  | 0.65756400  |
| H | 1.23958900  | 1.29824400  | 2.07235800  |
| H | -1.23098900 | -1.30635000 | -2.06439000 |
| H | -2.53040900 | -2.01872600 | 2.55513300  |
| H | -4.36287700 | -3.60946300 | 3.01474300  |
| H | -5.48164200 | -4.78863400 | 1.14412800  |
| H | -4.77015400 | -4.37984900 | -1.19478700 |
| H | -2.94903200 | -2.80109500 | -1.67391500 |
| H | 2.53900900  | 2.01062000  | -2.54716400 |
| H | 4.37147700  | 3.60135600  | -3.00677400 |
| H | 5.49024200  | 4.78052800  | -1.13615900 |
| H | 4.77875400  | 4.37174300  | 1.20275600  |
| H | 2.95763200  | 2.79298900  | 1.68188400  |
| O | -0.95727000 | -0.74421200 | 1.21931000  |
| O | 0.96587000  | 0.73610600  | -1.21134200 |

4Oc compound

|   |             |             |             |
|---|-------------|-------------|-------------|
| C | -5.20223000 | -1.33780200 | 0.11419500  |
| C | -6.30130300 | -2.22365700 | 0.22096000  |
| C | -7.55863400 | -1.67472900 | 0.34624500  |
| C | -7.74851000 | -0.27209600 | 0.36784300  |
| C | -6.68604900 | 0.62825300  | 0.26470000  |
| C | -5.43511400 | 0.06453300  | 0.13999400  |
| O | -4.24915400 | 0.74055600  | 0.02417000  |
| C | -3.27004300 | -0.21048100 | -0.07442100 |
| C | -3.81208100 | -1.49952700 | -0.02341800 |
| C | -1.94805000 | 0.22509600  | -0.20416400 |
| C | -1.40601200 | 1.51414100  | -0.25516700 |
| C | -0.01586200 | 1.35241600  | -0.39278100 |
| C | 0.21702100  | -0.04991800 | -0.41858000 |
| O | -0.96893900 | -0.72594100 | -0.30275600 |
| C | 1.08321000  | 2.23827100  | -0.49954600 |
| C | 2.34054100  | 1.68934300  | -0.62483100 |
| C | 2.53041700  | 0.28671000  | -0.64642900 |
| C | 1.46795600  | -0.61363900 | -0.54328500 |
| H | -6.15081100 | -3.29535600 | 0.20395700  |
| H | -8.42359500 | -2.31983800 | 0.43037600  |
| H | -8.75436400 | 0.11709500  | 0.46797600  |
| H | -6.83513500 | 1.69926300  | 0.28156300  |
| H | -3.24307100 | -2.41404600 | -0.08145900 |
| H | -1.97502100 | 2.42866100  | -0.19712600 |
| H | 0.93271800  | 3.30997000  | -0.48254300 |
| H | 3.20550300  | 2.33445200  | -0.70896300 |
| H | 3.53627100  | -0.10248100 | -0.74656200 |
| H | 1.61704200  | -1.68464900 | -0.56014900 |

*4Od compound*

|   |             |             |             |
|---|-------------|-------------|-------------|
| C | 0.77623400  | 1.14979500  | -1.07678800 |
| C | -0.03272700 | 0.06753000  | -0.70458700 |
| C | 0.01996000  | -0.05751300 | 0.70594500  |
| C | 1.28407400  | 1.62707700  | 0.17252400  |
| C | -1.29684100 | -1.61706000 | -0.17116600 |
| C | -0.78900100 | -1.13977800 | 1.07814600  |
| C | -2.14572100 | -2.68536200 | -0.27508800 |
| C | -2.50530700 | -3.30856500 | 0.93275400  |
| C | -2.02585700 | -2.86718000 | 2.17970200  |
| C | -1.16817700 | -1.78631900 | 2.27395900  |
| C | 2.13295500  | 2.69537800  | 0.27644700  |
| C | 2.49254100  | 3.31858200  | -0.93139500 |
| C | 2.01309100  | 2.87719600  | -2.17834300 |
| C | 1.15541000  | 1.79633500  | -2.27260100 |
| H | -2.51766100 | -3.02938200 | -1.23083000 |
| H | -3.17562800 | -4.15857700 | 0.89762000  |
| H | -2.33679900 | -3.38600800 | 3.07698300  |
| H | -0.79457100 | -1.44002400 | 3.22859900  |
| H | 2.50489500  | 3.03939900  | 1.23218800  |
| H | 3.16286100  | 4.16859300  | -0.89626100 |
| H | 2.32403200  | 3.39602500  | -3.07562500 |
| H | 0.78180500  | 1.45004100  | -3.22724000 |
| O | -0.81905800 | -0.86007100 | -1.25536800 |
| O | 0.80629100  | 0.87008800  | 1.25672700  |

4Sa compound

|   |             |             |             |
|---|-------------|-------------|-------------|
| C | 2.51439300  | 1.04005300  | -1.29970600 |
| C | 1.33776800  | 0.39100100  | -0.96633600 |
| C | 0.32173000  | 1.25833700  | -0.52519600 |
| C | 2.46413700  | 2.43336400  | -1.12913700 |
| C | -0.98134900 | 0.93142700  | -0.11432900 |
| C | -3.12775400 | -0.24206700 | 0.47818000  |
| C | -3.16750400 | 1.14755000  | 0.67895000  |
| C | -1.98735600 | 1.79529700  | 0.35565800  |
| C | -4.17572100 | -1.20376500 | 0.72096400  |
| C | 3.51072000  | 3.39564900  | -1.37551900 |
| C | -3.91860200 | -2.59092200 | 0.68938600  |
| C | -4.93373500 | -3.50218900 | 0.92434400  |
| C | -6.22885300 | -3.05311900 | 1.19452900  |
| C | -6.50149400 | -1.68404700 | 1.22790900  |
| C | -5.49016700 | -0.76671700 | 0.99568900  |
| C | 3.39100200  | 4.73423400  | -0.94517200 |
| C | 4.40308300  | 5.64673900  | -1.18829900 |
| C | 5.55718800  | 5.24769500  | -1.86711400 |
| C | 5.69163000  | 3.92748700  | -2.30162500 |
| C | 4.68374900  | 3.00877700  | -2.06005100 |
| S | -1.56839200 | -0.72453500 | -0.14268900 |
| S | 0.89097500  | 2.92057800  | -0.54801000 |
| H | 3.40102700  | 0.52514900  | -1.63862000 |
| H | 1.20492900  | -0.68098600 | -1.02496100 |
| H | -4.03538300 | 1.65583000  | 1.07208800  |
| H | -1.83826400 | 2.86155400  | 0.46104700  |
| H | -2.91553600 | -2.95318600 | 0.49692800  |
| H | -4.72079200 | -4.56355800 | 0.90261700  |
| H | -7.02186200 | -3.76765100 | 1.37810500  |
| H | -7.50632300 | -1.33587700 | 1.43170100  |
| H | -5.72124100 | 0.29008000  | 1.00855900  |
| H | 2.50842300  | 5.05380600  | -0.40356400 |
| H | 4.30012500  | 6.66921900  | -0.84733600 |
| H | 6.34804400  | 5.96311100  | -2.05643900 |
| H | 6.58354600  | 3.61936500  | -2.83264200 |
| H | 4.79604900  | 1.99396600  | -2.41772000 |

4Sb compound

|   |             |             |             |
|---|-------------|-------------|-------------|
| C | 1.25738300  | 0.93611000  | 0.87728500  |
| C | 0.20152700  | 0.06366100  | 0.67727800  |
| C | -0.19824000 | -0.06820800 | -0.68190600 |
| C | 1.70727700  | 1.50840200  | -0.32725900 |
| C | -1.70398900 | -1.51295000 | 0.32263100  |
| C | -1.25409600 | -0.94065700 | -0.88191400 |
| C | -2.77581600 | -2.45643300 | 0.49448200  |
| C | 2.77910500  | 2.45188300  | -0.49911100 |
| C | -3.15355800 | -2.90633200 | 1.78048100  |
| C | -4.18522700 | -3.81403700 | 1.93607800  |
| C | -4.86682000 | -4.29764000 | 0.81554400  |
| C | -4.50792000 | -3.86552200 | -0.46421300 |
| C | -3.47762600 | -2.95715600 | -0.62774000 |
| C | 3.48089600  | 2.95262800  | 0.62311300  |
| C | 4.51119100  | 3.86099300  | 0.45958600  |
| C | 4.87011000  | 4.29309000  | -0.82017300 |
| C | 4.18853500  | 3.80946500  | -1.94070900 |
| C | 3.15686600  | 2.90176100  | -1.78511200 |
| H | 1.69750100  | 1.15767300  | 1.83728300  |
| H | -1.69421200 | -1.16222200 | -1.84191200 |
| H | -2.63788600 | -2.53823200 | 2.65939800  |
| H | -4.46428500 | -4.14830600 | 2.92725900  |
| H | -5.67441600 | -5.00868700 | 0.93945500  |
| H | -5.03559100 | -4.24222400 | -1.33132300 |
| H | -3.21096300 | -2.63773600 | -1.62603600 |
| H | 3.21421700  | 2.63322700  | 1.62141100  |
| H | 5.03884700  | 4.23771300  | 1.32669700  |
| H | 5.67770600  | 5.00413600  | -0.94408400 |
| H | 4.46760900  | 4.14371600  | -2.93189200 |
| H | 2.64120900  | 2.53364200  | -2.66403000 |
| S | -0.77343000 | -0.93667100 | 1.71490000  |
| S | 0.77671800  | 0.93212300  | -1.71952900 |

4Sc compound

|   |             |             |             |
|---|-------------|-------------|-------------|
| C | -5.41251100 | -1.14906300 | 0.13552600  |
| C | -6.40578100 | -2.12624400 | 0.23155100  |
| C | -7.74694500 | -1.73675000 | 0.36467400  |
| C | -8.10438800 | -0.38996900 | 0.40268900  |
| C | -7.12976700 | 0.60725500  | 0.30858600  |
| C | -5.79647900 | 0.21230700  | 0.17621100  |
| S | -4.41139600 | 1.26062000  | 0.04149200  |
| C | -3.31839500 | -0.11125800 | -0.06935600 |
| C | -3.99202600 | -1.30313000 | -0.00514600 |
| C | -1.89969800 | 0.12587300  | -0.20923000 |
| C | -1.22606600 | 1.31774500  | -0.27343600 |
| C | 0.19441900  | 1.16367800  | -0.41410900 |
| C | 0.57838600  | -0.19769200 | -0.45480000 |
| S | -0.80670100 | -1.24600500 | -0.32008500 |
| C | 1.18768900  | 2.14085800  | -0.51013100 |
| C | 2.52885300  | 1.75136300  | -0.64325700 |
| C | 2.88629400  | 0.40458200  | -0.68127900 |
| C | 1.91167400  | -0.59264100 | -0.58717900 |
| H | -6.14349900 | -3.17697400 | 0.20347900  |
| H | -8.51455000 | -2.49667700 | 0.43882200  |
| H | -9.14448100 | -0.10893100 | 0.50588100  |
| H | -7.40469000 | 1.65419500  | 0.33786400  |
| H | -3.50348500 | -2.26725700 | -0.05536600 |
| H | -1.71460700 | 2.28187200  | -0.22321000 |
| H | 0.92540900  | 3.19158900  | -0.48205500 |
| H | 3.29645800  | 2.51129000  | -0.71740300 |
| H | 3.92638700  | 0.12354400  | -0.78447300 |
| H | 2.18659500  | -1.63958200 | -0.61646100 |

*4Sd compound*

|   |             |             |             |
|---|-------------|-------------|-------------|
| C | 0.87621900  | 1.25389500  | -1.00158100 |
| C | 0.03959000  | 0.14592500  | -0.69904000 |
| C | -0.03960700 | -0.14591700 | 0.69904000  |
| C | 1.43046900  | 1.79837300  | 0.18648000  |
| C | -1.43048600 | -1.79836500 | -0.18648000 |
| C | -0.87623600 | -1.25388700 | 1.00158100  |
| C | -2.27971500 | -2.88494700 | -0.15851900 |
| C | -2.58684400 | -3.44718400 | 1.09152900  |
| C | -2.05319600 | -2.92820400 | 2.27414100  |
| C | -1.19859500 | -1.83409900 | 2.24120400  |
| C | 2.27969900  | 2.88495500  | 0.15851900  |
| C | 2.58682700  | 3.44719200  | -1.09152900 |
| C | 2.05318000  | 2.92821300  | -2.27414100 |
| C | 1.19857800  | 1.83410700  | -2.24120400 |
| H | -2.70173600 | -3.29920700 | -1.06535700 |
| H | -3.25193900 | -4.30085000 | 1.13303300  |
| H | -2.30848200 | -3.38311400 | 3.22229700  |
| H | -0.78372800 | -1.43012800 | 3.15682200  |
| H | 2.70171900  | 3.29921500  | 1.06535700  |
| H | 3.25192200  | 4.30085800  | -1.13303300 |
| H | 2.30846600  | 3.38312200  | -3.22229700 |
| H | 0.78371200  | 1.43013600  | -3.15682200 |
| S | -0.90168300 | -0.92382300 | -1.65388400 |
| S | 0.90166600  | 0.92383100  | 1.65388400  |



50a compound

|   |             |             |             |
|---|-------------|-------------|-------------|
| C | 0.54776900  | 1.21318900  | 0.45624600  |
| C | -0.73227700 | 1.18987100  | -0.03516500 |
| C | -1.31196300 | -0.02361900 | -0.48728300 |
| C | -0.53664300 | -1.20984100 | -0.41868100 |
| C | 0.74340300  | -1.18652300 | 0.07273000  |
| C | 1.32308900  | 0.02696700  | 0.52484800  |
| C | -2.63554200 | -0.05701700 | -0.99732800 |
| C | 2.64666800  | 0.06036500  | 1.03489400  |
| C | -3.44069900 | -1.07927200 | -1.49877800 |
| C | -4.66313800 | -0.50493900 | -1.85458200 |
| C | -4.57664300 | 0.85481900  | -1.56235900 |
| C | 3.45182500  | 1.08262000  | 1.53634300  |
| C | 4.67426400  | 0.50828600  | 1.89214700  |
| C | 4.58776900  | -0.85147100 | 1.59992400  |
| C | -5.50089500 | 1.94638000  | -1.70607700 |
| C | 5.51202100  | -1.94303200 | 1.74364200  |
| C | -5.14088000 | 3.25236900  | -1.32085300 |
| C | -6.04398700 | 4.29380000  | -1.46614900 |
| C | -7.31397000 | 4.05379800  | -1.99457800 |
| C | -7.68034600 | 2.76218600  | -2.37945300 |
| C | -6.78496500 | 1.71454600  | -2.23829000 |
| C | 5.15200600  | -3.24902100 | 1.35841800  |
| C | 6.05511300  | -4.29045300 | 1.50371400  |
| C | 7.32509600  | -4.05045000 | 2.03214300  |
| C | 7.69147200  | -2.75883800 | 2.41701800  |
| C | 6.79609100  | -1.71119800 | 2.27585500  |
| O | -3.34496900 | 1.11608500  | -1.04365900 |
| O | 3.35609500  | -1.11273700 | 1.08122400  |
| H | 0.96880500  | 2.15083100  | 0.79536500  |
| H | -1.31197100 | 2.10140600  | -0.08173600 |
| H | -0.95767900 | -2.14748300 | -0.75780000 |
| H | 1.32309700  | -2.09805800 | 0.11930100  |
| H | -3.16430900 | -2.11681600 | -1.59145300 |
| H | -5.51653300 | -1.00953600 | -2.27568100 |
| H | 3.17543500  | 2.12016300  | 1.62901900  |
| H | 5.52765900  | 1.01288300  | 2.31324700  |
| H | -4.15663700 | 3.43637500  | -0.91173700 |
| H | -5.76222500 | 5.29618600  | -1.16843900 |
| H | -8.01658000 | 4.87056300  | -2.10637600 |
| H | -8.66544500 | 2.57707200  | -2.78911100 |
| H | -7.07702000 | 0.71636200  | -2.53903700 |
| H | 4.16776300  | -3.43302700 | 0.94930200  |
| H | 5.77335100  | -5.29283800 | 1.20600400  |
| H | 8.02770600  | -4.86721500 | 2.14394200  |
| H | 8.67657100  | -2.57372300 | 2.82667700  |
| H | 7.08814500  | -0.71301400 | 2.57660200  |

50b compound

|   |             |             |             |
|---|-------------|-------------|-------------|
| C | 0.54776900  | 1.21318900  | 0.45624600  |
| C | -0.73227700 | 1.18987100  | -0.03516500 |
| C | -1.31196300 | -0.02361900 | -0.48728300 |
| C | -0.53664300 | -1.20984100 | -0.41868100 |
| C | 0.74340300  | -1.18652300 | 0.07273000  |
| C | 1.32308900  | 0.02696700  | 0.52484800  |
| C | -2.63554200 | -0.05701700 | -0.99732800 |
| C | 2.64666800  | 0.06036500  | 1.03489400  |
| C | -3.44069900 | -1.07927200 | -1.49877800 |
| C | -4.66313800 | -0.50493900 | -1.85458200 |
| C | -4.57664300 | 0.85481900  | -1.56235900 |
| C | 3.45182500  | 1.08262000  | 1.53634300  |
| C | 4.67426400  | 0.50828600  | 1.89214700  |
| C | 4.58776900  | -0.85147100 | 1.59992400  |
| C | -5.50089500 | 1.94638000  | -1.70607700 |
| C | 5.51202100  | -1.94303200 | 1.74364200  |
| C | -5.14088000 | 3.25236900  | -1.32085300 |
| C | -6.04398700 | 4.29380000  | -1.46614900 |
| C | -7.31397000 | 4.05379800  | -1.99457800 |
| C | -7.68034600 | 2.76218600  | -2.37945300 |
| C | -6.78496500 | 1.71454600  | -2.23829000 |
| C | 5.15200600  | -3.24902100 | 1.35841800  |
| C | 6.05511300  | -4.29045300 | 1.50371400  |
| C | 7.32509600  | -4.05045000 | 2.03214300  |
| C | 7.69147200  | -2.75883800 | 2.41701800  |
| C | 6.79609100  | -1.71119800 | 2.27585500  |
| O | -3.34496900 | 1.11608500  | -1.04365900 |
| O | 3.35609500  | -1.11273700 | 1.08122400  |
| H | 0.96880500  | 2.15083100  | 0.79536500  |
| H | -1.31197100 | 2.10140600  | -0.08173600 |
| H | -0.95767900 | -2.14748300 | -0.75780000 |
| H | 1.32309700  | -2.09805800 | 0.11930100  |
| H | -3.16430900 | -2.11681600 | -1.59145300 |
| H | -5.51653300 | -1.00953600 | -2.27568100 |
| H | 3.17543500  | 2.12016300  | 1.62901900  |
| H | 5.52765900  | 1.01288300  | 2.31324700  |
| H | -4.15663700 | 3.43637500  | -0.91173700 |
| H | -5.76222500 | 5.29618600  | -1.16843900 |
| H | -8.01658000 | 4.87056300  | -2.10637600 |
| H | -8.66544500 | 2.57707200  | -2.78911100 |
| H | -7.07702000 | 0.71636200  | -2.53903700 |
| H | 4.16776300  | -3.43302700 | 0.94930200  |
| H | 5.77335100  | -5.29283800 | 1.20600400  |
| H | 8.02770600  | -4.86721500 | 2.14394200  |
| H | 8.67657100  | -2.57372300 | 2.82667700  |
| H | 7.08814500  | -0.71301400 | 2.57660200  |

50c compound

|   |             |             |             |
|---|-------------|-------------|-------------|
| C | -5.49898000 | -1.62725600 | 1.37015400  |
| C | -5.63211600 | -0.21776000 | 1.32826500  |
| C | -6.80027000 | 0.44918700  | 1.63759500  |
| C | -7.88010300 | -0.35327900 | 2.00569700  |
| C | -7.78550500 | -1.76218400 | 2.05905900  |
| C | -6.60944000 | -2.41370000 | 1.74643800  |
| C | -4.16546100 | -1.89899400 | 0.98877300  |
| C | -3.55700600 | -0.67196400 | 0.73667700  |
| O | -4.44976000 | 0.35195200  | 0.94324300  |
| C | -2.24000000 | -0.32892400 | 0.32501300  |
| C | -1.87204200 | 1.02856100  | 0.13734000  |
| C | -0.60119600 | 1.35661100  | -0.25947600 |
| C | 0.36992500  | 0.34805000  | -0.49019100 |
| C | 0.00196600  | -1.00943500 | -0.30251800 |
| C | -1.26887900 | -1.33748500 | 0.09429800  |
| C | 1.68693100  | 0.69109000  | -0.90185300 |
| O | 2.57968300  | -0.33282600 | -1.10842700 |
| C | 3.76204100  | 0.23688600  | -1.49344500 |
| C | 3.62890800  | 1.64638200  | -1.53532200 |
| C | 2.29539000  | 1.91812000  | -1.15394000 |
| C | 4.93019300  | -0.43006100 | -1.80277900 |
| C | 6.01002900  | 0.37240500  | -2.17087400 |
| C | 5.91543400  | 1.78131100  | -2.22422500 |
| C | 4.73937000  | 2.43282700  | -1.91159800 |
| H | -6.87221000 | 1.52759700  | 1.59662500  |
| H | -8.82147400 | 0.11871100  | 2.25879300  |
| H | -8.65669500 | -2.33415000 | 2.35167800  |
| H | -6.53598500 | -3.49298700 | 1.78702300  |
| H | -3.69652500 | -2.86612600 | 0.90510500  |
| H | -2.60656200 | 1.80261400  | 0.31122800  |
| H | -0.34038000 | 2.39775500  | -0.39701400 |
| H | 0.73648700  | -1.78348800 | -0.47640700 |
| H | -1.52969500 | -2.37862900 | 0.23183600  |
| H | 1.82645500  | 2.88525300  | -1.07026400 |
| H | 5.00213000  | -1.50847200 | -1.76181900 |
| H | 6.95139800  | -0.09958600 | -2.42397400 |
| H | 6.78662500  | 2.35327600  | -2.51683800 |
| H | 4.66591800  | 3.51211400  | -1.95217400 |

*50d compound*

|   |             |             |             |
|---|-------------|-------------|-------------|
| C | 0.77440000  | 1.32686700  | 0.31871700  |
| C | 1.60104900  | 0.19796300  | 0.11751000  |
| C | 1.02885200  | -1.09627600 | -0.16543600 |
| C | -0.31206700 | -1.33862600 | -0.26086400 |
| C | -1.13871600 | -0.20972200 | -0.05965600 |
| C | -0.56651900 | 1.08451600  | 0.22328900  |
| C | -2.54169100 | -0.01181400 | -0.06762700 |
| C | -2.74439700 | 1.36922800  | 0.20633800  |
| O | -1.55048000 | 2.02313600  | 0.38041200  |
| C | 3.00402400  | 0.00005400  | 0.12548000  |
| C | 3.20673000  | -1.38098800 | -0.14848500 |
| O | 2.01281300  | -2.03489500 | -0.32255900 |
| C | -3.65845800 | -0.85060100 | -0.27672200 |
| C | -4.91459500 | -0.28644400 | -0.20526300 |
| C | -5.07812200 | 1.09103200  | 0.06931900  |
| C | -3.99224700 | 1.94613900  | 0.28071300  |
| C | 4.12079100  | 0.83884100  | 0.33457500  |
| C | 5.37692900  | 0.27468300  | 0.26311700  |
| C | 5.54045600  | -1.10279300 | -0.01146600 |
| C | 4.45458000  | -1.95790000 | -0.22286000 |
| H | 1.17093000  | 2.30994300  | 0.53236800  |
| H | -0.70859700 | -2.32170200 | -0.47451500 |
| H | -3.52860700 | -1.90465300 | -0.48665900 |
| H | -5.79332900 | -0.89876700 | -0.36011500 |
| H | -6.08043800 | 1.49906300  | 0.11778600  |
| H | -4.12213800 | 2.99912200  | 0.49046400  |
| H | 3.99094100  | 1.89289300  | 0.54451200  |
| H | 6.25566300  | 0.88700600  | 0.41796800  |
| H | 6.54277100  | -1.51082400 | -0.05993300 |
| H | 4.58447000  | -3.01088200 | -0.43261000 |

5Sa compound

|   |             |             |             |
|---|-------------|-------------|-------------|
| C | 0.76265100  | 1.37697800  | 0.02689700  |
| C | -0.45931200 | 1.42307700  | -0.59320800 |
| C | -0.99044400 | 0.29348400  | -1.26888200 |
| C | -0.20440000 | -0.88938200 | -1.27767800 |
| C | 1.01756400  | -0.93548100 | -0.65757300 |
| C | 1.54869500  | 0.19411200  | 0.01810000  |
| C | -2.26399300 | 0.33310100  | -1.91473500 |
| C | 2.82224400  | 0.15449500  | 0.66395400  |
| C | -2.90240000 | -0.68234200 | -2.63704500 |
| C | -4.14692900 | -0.31828800 | -3.14120900 |
| C | -4.51922900 | 0.99251500  | -2.83149500 |
| C | 3.46065100  | 1.16993700  | 1.38626400  |
| C | 4.70518000  | 0.80588300  | 1.89042800  |
| C | 5.07748100  | -0.50491900 | 1.58071300  |
| C | -5.73544600 | 1.68655800  | -3.20056500 |
| C | 6.29369800  | -1.19896200 | 1.94978300  |
| C | -5.84217900 | 3.08700500  | -3.08858500 |
| C | -7.01194900 | 3.73730000  | -3.44795300 |
| C | -8.10146900 | 3.00648200  | -3.92529700 |
| C | -8.01243300 | 1.61824400  | -4.04001000 |
| C | -6.84456900 | 0.96229600  | -3.68347700 |
| C | 6.40042900  | -2.59940900 | 1.83780600  |
| C | 7.57020000  | -3.24970300 | 2.19717400  |
| C | 8.65972200  | -2.51888500 | 2.67451400  |
| C | 8.57068700  | -1.13064600 | 2.78922300  |
| C | 7.40282200  | -0.47469900 | 2.43269000  |
| S | -3.27864400 | 1.76557300  | -1.87987100 |
| S | 3.83689500  | -1.27797700 | 0.62908900  |
| H | 1.12839900  | 2.26363900  | 0.52631900  |
| H | -1.02488600 | 2.34632900  | -0.56492300 |
| H | -0.57014800 | -1.77604300 | -1.77710000 |
| H | 1.58313700  | -1.85873300 | -0.68585800 |
| H | -2.46315100 | -1.65590900 | -2.79989000 |
| H | -4.76122400 | -0.97454500 | -3.74011300 |
| H | 3.02140200  | 2.14350500  | 1.54911000  |
| H | 5.31947500  | 1.46214100  | 2.48933200  |
| H | -4.99734900 | 3.66815200  | -2.73811400 |
| H | -7.07656800 | 4.81490300  | -3.36264100 |
| H | -9.01503300 | 3.51624000  | -4.20581600 |
| H | -8.85879400 | 1.04853300  | -4.40317900 |
| H | -6.79750900 | -0.11627400 | -3.75775700 |
| H | 5.55559800  | -3.18055700 | 1.48733900  |
| H | 7.63481800  | -4.32730700 | 2.11186500  |
| H | 9.57328500  | -3.02864200 | 2.95503200  |
| H | 9.41704900  | -0.56093600 | 3.15238900  |
| H | 7.35576300  | 0.60387100  | 2.50696700  |

5Sb compound

|   |             |             |             |
|---|-------------|-------------|-------------|
| C | -0.98236200 | 0.03385600  | -0.97698600 |
| C | -1.33218800 | -0.18579400 | 0.39738400  |
| C | -0.31387600 | -0.21374500 | 1.38672900  |
| C | 0.98235600  | -0.03386100 | 0.97696500  |
| C | 1.33218300  | 0.18579000  | -0.39740500 |
| C | 0.31387000  | 0.21374100  | -1.38675000 |
| C | 3.45123100  | 0.25609700  | 0.61048900  |
| C | 2.71426700  | 0.34491600  | -0.57304800 |
| C | -3.45123600 | -0.25610200 | -0.61051000 |
| C | -2.71427200 | -0.34492100 | 0.57302700  |
| C | 4.88624200  | 0.36658400  | 0.75804400  |
| C | -4.88624700 | -0.36658900 | -0.75806500 |
| C | 5.52846600  | -0.03223900 | 1.94803700  |
| C | 6.90279400  | 0.07793300  | 2.07846900  |
| C | 7.66672800  | 0.59069200  | 1.02747400  |
| C | 7.04605600  | 0.99332100  | -0.15657500 |
| C | 5.67204100  | 0.88261700  | -0.29441300 |
| C | -5.52847200 | 0.03223700  | -1.94805700 |
| C | -6.90280000 | -0.07793500 | -2.07848900 |
| C | -7.66673300 | -0.59069800 | -1.02749500 |
| C | -7.04606100 | -0.99332900 | 0.15655300  |
| C | -5.67204600 | -0.88262600 | 0.29439100  |
| H | -0.56992000 | -0.37776400 | 2.42616400  |
| H | 0.56991400  | 0.37776000  | -2.42618400 |
| H | 3.17549200  | 0.49713700  | -1.53824100 |
| H | -3.17549700 | -0.49714200 | 1.53822000  |
| H | 4.94938100  | -0.44833200 | 2.76389300  |
| H | 7.38396700  | -0.23888000 | 2.99522200  |
| H | 8.74143400  | 0.67647300  | 1.13156500  |
| H | 7.63714200  | 1.39806500  | -0.96853300 |
| H | 5.20307400  | 1.21842200  | -1.20986600 |
| H | -4.94938700 | 0.44833200  | -2.76391200 |
| H | -7.38397300 | 0.23887900  | -2.99524200 |
| H | -8.74143900 | -0.67647900 | -1.13158700 |
| H | -7.63714700 | -1.39807700 | 0.96850900  |
| H | -5.20307900 | -1.21843300 | 1.20984200  |
| S | 2.41642800  | -0.02039800 | 1.99595600  |
| S | -2.41643300 | 0.02039300  | -1.99597700 |

5Sc compound

|   |             |             |             |
|---|-------------|-------------|-------------|
| C | -5.65232700 | -1.35626900 | 1.40069700  |
| C | -6.03849500 | 0.01413200  | 1.43583700  |
| C | -7.32381500 | 0.39745100  | 1.79587500  |
| C | -8.23453800 | -0.60341400 | 2.12504900  |
| C | -7.87634100 | -1.96624800 | 2.09779700  |
| C | -6.60107900 | -2.34924200 | 1.74071500  |
| C | -4.30742300 | -1.51786200 | 1.01004600  |
| C | -3.64732000 | -0.31834800 | 0.74390900  |
| S | -4.71386800 | 1.06616900  | 0.98062600  |
| C | -2.28688500 | -0.15179200 | 0.32933900  |
| C | -1.73734200 | 1.13457600  | 0.09241900  |
| C | -0.43440600 | 1.29206100  | -0.30471600 |
| C | 0.41681000  | 0.17091800  | -0.49451600 |
| C | -0.13273300 | -1.11545100 | -0.25759700 |
| C | -1.43566900 | -1.27293600 | 0.13953900  |
| C | 1.77724500  | 0.33747300  | -0.90908600 |
| S | 2.84378800  | -1.04704500 | -1.14582400 |
| C | 4.16841800  | 0.00499400  | -1.60102300 |
| C | 3.78225500  | 1.37539600  | -1.56586300 |
| C | 2.43735300  | 1.53698900  | -1.17520800 |
| C | 5.45373600  | -0.37832500 | -1.96106900 |
| C | 6.36446200  | 0.62254100  | -2.29023000 |
| C | 6.00627000  | 1.98537500  | -2.26295900 |
| C | 4.73101000  | 2.36837000  | -1.90586900 |
| H | -7.61511500 | 1.43964100  | 1.82187700  |
| H | -9.24243300 | -0.32589500 | 2.40872900  |
| H | -8.61362100 | -2.71393100 | 2.36063700  |
| H | -6.31860800 | -3.39480100 | 1.71753600  |
| H | -3.83446600 | -2.48601200 | 0.92585700  |
| H | -2.35393400 | 2.01461300  | 0.22616300  |
| H | -0.05820000 | 2.29150200  | -0.47342200 |
| H | 0.48385900  | -1.99548800 | -0.39134000 |
| H | -1.81187500 | -2.27237600 | 0.30824500  |
| H | 1.96440000  | 2.50513900  | -1.09100300 |
| H | 5.74503200  | -1.42051600 | -1.98708700 |
| H | 7.37235600  | 0.34502200  | -2.57391700 |
| H | 6.74355300  | 2.73306000  | -2.52578900 |
| H | 4.44854400  | 3.41393000  | -1.88267500 |

*5Sd compound*

|   |             |             |             |
|---|-------------|-------------|-------------|
| C | 1.27331800  | 0.05987300  | 0.61792000  |
| C | 2.67563400  | 0.06058100  | 1.01026600  |
| C | 3.52437200  | -0.23959900 | -0.07928000 |
| C | 1.10990900  | -0.24315500 | -0.76517200 |
| C | -0.14798700 | -0.30496300 | -1.38737200 |
| C | -1.27331800 | -0.05987300 | -0.61791800 |
| C | -1.10991000 | 0.24315600  | 0.76517400  |
| C | 0.14798600  | 0.30496400  | 1.38737400  |
| C | 3.25012200  | 0.30655200  | 2.25540900  |
| C | 4.63688100  | 0.25056000  | 2.39285700  |
| C | 5.45988500  | -0.04849500 | 1.30105200  |
| C | 4.91213100  | -0.29801400 | 0.04774800  |
| C | -2.67563400 | -0.06058100 | -1.01026500 |
| C | -3.52437300 | 0.23959900  | 0.07928000  |
| C | -3.25012100 | -0.30655200 | -2.25540900 |
| C | -4.63688000 | -0.25056000 | -2.39285800 |
| C | -5.45988400 | 0.04849500  | -1.30105400 |
| C | -4.91213200 | 0.29801400  | -0.04774900 |
| H | -0.23088400 | -0.53857400 | -2.44165000 |
| H | 0.23088300  | 0.53857500  | 2.44165200  |
| H | 2.63080900  | 0.53972900  | 3.11305200  |
| H | 5.08379700  | 0.44165200  | 3.36038700  |
| H | 6.53388500  | -0.08645800 | 1.43127500  |
| H | 5.54418800  | -0.52977900 | -0.80010500 |
| H | -2.63080700 | -0.53972900 | -3.11305100 |
| H | -5.08379500 | -0.44165200 | -3.36038800 |
| H | -6.53388400 | 0.08645800  | -1.43127700 |
| H | -5.54418900 | 0.52977900  | 0.80010300  |
| S | 2.62261000  | -0.51859900 | -1.56118000 |
| S | -2.62261200 | 0.51859900  | 1.56118100  |



### 5.3 Anionic ground state

#### 40a compound

|   |             |             |             |
|---|-------------|-------------|-------------|
| C | 2.79806300  | -0.45036600 | -0.78196800 |
| C | 1.54802500  | -1.04002100 | -0.53430000 |
| C | 0.66895100  | -0.00887000 | -0.20347900 |
| C | 2.67241600  | 0.92224000  | -0.60189300 |
| C | -0.68941200 | 0.01926400  | 0.13801800  |
| C | -2.69287700 | -0.91184500 | 0.53643200  |
| C | -2.81852400 | 0.46076000  | 0.71650700  |
| C | -1.56848600 | 1.05041500  | 0.46883900  |
| C | -3.59722900 | -2.00585100 | 0.64336900  |
| C | 3.57676800  | 2.01624600  | -0.70883000 |
| C | -3.18145600 | -3.34167900 | 0.39401000  |
| C | -4.07205000 | -4.39884200 | 0.50162800  |
| C | -5.40959200 | -4.18896600 | 0.85889100  |
| C | -5.83442100 | -2.87483100 | 1.10815000  |
| C | -4.95783200 | -1.80897400 | 1.00496700  |
| C | 3.16099500  | 3.35207300  | -0.45947100 |
| C | 4.05158800  | 4.40923700  | -0.56708900 |
| C | 5.38913100  | 4.19936100  | -0.92435200 |
| C | 5.81396000  | 2.88522500  | -1.17361100 |
| C | 4.93737100  | 1.81936800  | -1.07042800 |
| O | -1.37454800 | -1.18301100 | 0.17842600  |
| O | 1.35408700  | 1.19340500  | -0.24388700 |
| H | 3.70503200  | -0.96284100 | -1.06352800 |
| H | 1.28773200  | -2.08485500 | -0.58259000 |
| H | -3.72549300 | 0.97323500  | 0.99806700  |
| H | -1.30819300 | 2.09524900  | 0.51712800  |
| H | -2.15080900 | -3.52167600 | 0.11673700  |
| H | -3.72027200 | -5.40719900 | 0.30393400  |
| H | -6.10033500 | -5.02016400 | 0.94116500  |
| H | -6.86697400 | -2.68604100 | 1.38690900  |
| H | -5.31419300 | -0.80431400 | 1.20352800  |
| H | 2.13034800  | 3.53207000  | -0.18219800 |
| H | 3.69981100  | 5.41759300  | -0.36939500 |
| H | 6.07987300  | 5.03055900  | -1.00662600 |
| H | 6.84651300  | 2.69643600  | -1.45237000 |
| H | 5.29373200  | 0.81470900  | -1.26898900 |

4Ob compound

|   |             |             |             |
|---|-------------|-------------|-------------|
| C | 0.97595900  | 0.96738200  | 1.08430600  |
| C | -0.00427400 | 0.05514400  | 0.69450000  |
| C | 0.01287400  | -0.06325100 | -0.68653200 |
| C | 1.58577900  | 1.39526100  | -0.11570700 |
| C | -1.57717900 | -1.40336800 | 0.12367500  |
| C | -0.96735800 | -0.97548900 | -1.07633800 |
| C | -2.62509500 | -2.31118100 | 0.40476100  |
| C | 2.63369400  | 2.30307500  | -0.39679300 |
| C | -3.06126900 | -2.57156300 | 1.73676000  |
| C | -4.08873700 | -3.46370200 | 1.99201500  |
| C | -4.74048400 | -4.14568500 | 0.95352100  |
| C | -4.32266900 | -3.90023700 | -0.36401100 |
| C | -3.29815800 | -3.01268300 | -0.63946200 |
| C | 3.06987000  | 2.56345800  | -1.72879200 |
| C | 4.09733700  | 3.45559700  | -1.98404600 |
| C | 4.74908400  | 4.13757900  | -0.94555100 |
| C | 4.33126900  | 3.89213000  | 0.37198000  |
| C | 3.30675800  | 3.00457600  | 0.64743000  |
| H | 1.24323000  | 1.30147700  | 2.07282200  |
| H | -1.23463000 | -1.30958300 | -2.06485400 |
| H | -2.57242600 | -2.05635800 | 2.55365600  |
| H | -4.39269600 | -3.63544900 | 3.02080200  |
| H | -5.54399600 | -4.84251700 | 1.16184000  |
| H | -4.80999100 | -4.41468600 | -1.18746700 |
| H | -3.00009800 | -2.84618400 | -1.66855200 |
| H | 2.58102700  | 2.04825300  | -2.54568800 |
| H | 4.40129700  | 3.62734500  | -3.01283300 |
| H | 5.55259600  | 4.83441200  | -1.15386900 |
| H | 4.81859000  | 4.40657900  | 1.19543700  |
| H | 3.00869800  | 2.83807700  | 1.67652100  |
| O | -0.96373300 | -0.74960300 | 1.22371800  |
| O | 0.97233300  | 0.74149600  | -1.21575000 |

4Oc compound

|   |             |             |             |
|---|-------------|-------------|-------------|
| C | -5.21763000 | -1.36236800 | 0.11569500  |
| C | -6.33395700 | -2.22206000 | 0.22418200  |
| C | -7.60922700 | -1.66491400 | 0.35125600  |
| C | -7.81225000 | -0.28156000 | 0.37412500  |
| C | -6.71249700 | 0.59987000  | 0.26726300  |
| C | -5.46149800 | 0.03850000  | 0.14254200  |
| O | -4.28185500 | 0.72436500  | 0.02734200  |
| C | -3.25874400 | -0.23407800 | -0.07557200 |
| C | -3.81642000 | -1.51811300 | -0.02297100 |
| C | -1.95934900 | 0.24869300  | -0.20301300 |
| C | -1.40167300 | 1.53272700  | -0.25561400 |
| C | -0.00046200 | 1.37698200  | -0.39428100 |
| C | 0.24340500  | -0.02388500 | -0.42112700 |
| O | -0.93623800 | -0.70975100 | -0.30592800 |
| C | 1.11586400  | 2.23667400  | -0.50276800 |
| C | 2.39113400  | 1.67952800  | -0.62984200 |
| C | 2.59415700  | 0.29617400  | -0.65271100 |
| C | 1.49440400  | -0.58525600 | -0.54584900 |
| H | -6.20283100 | -3.29870300 | 0.20906300  |
| H | -8.46745500 | -2.32541100 | 0.43467600  |
| H | -8.81434400 | 0.11986600  | 0.47391500  |
| H | -6.83992300 | 1.67597800  | 0.28200000  |
| H | -3.25342300 | -2.43522400 | -0.08044200 |
| H | -1.96466900 | 2.44983800  | -0.19814300 |
| H | 0.98473900  | 3.31331800  | -0.48764900 |
| H | 3.24936300  | 2.34002600  | -0.71326200 |
| H | 3.59625200  | -0.10525200 | -0.75250100 |
| H | 1.62183000  | -1.66136400 | -0.56058600 |

*4Od compound*

|   |             |             |             |
|---|-------------|-------------|-------------|
| C | 0.77561200  | 1.15002500  | -1.08465600 |
| C | -0.02600500 | 0.07395300  | -0.68886300 |
| C | 0.01323800  | -0.06393700 | 0.69022100  |
| C | 1.29868200  | 1.64692100  | 0.16317600  |
| C | -1.31144900 | -1.63690400 | -0.16181700 |
| C | -0.78837800 | -1.14000800 | 1.08601400  |
| C | -2.16181700 | -2.70837900 | -0.25662400 |
| C | -2.54207600 | -3.35817000 | 0.95266600  |
| C | -2.05014200 | -2.89798100 | 2.17841600  |
| C | -1.18445200 | -1.80775900 | 2.27921700  |
| C | 2.14905000  | 2.71839600  | 0.25798200  |
| C | 2.52930900  | 3.36818600  | -0.95130700 |
| C | 2.03737600  | 2.90799700  | -2.17705800 |
| C | 1.17168500  | 1.81777500  | -2.27785900 |
| H | -2.52527600 | -3.04028600 | -1.22206900 |
| H | -3.21278200 | -4.20872100 | 0.91753900  |
| H | -2.35309000 | -3.40841900 | 3.08878300  |
| H | -0.81935800 | -1.47352300 | 3.24272400  |
| H | 2.51250900  | 3.05030300  | 1.22342700  |
| H | 3.20001500  | 4.21873800  | -0.91618100 |
| H | 2.34032400  | 3.41843600  | -3.08742400 |
| H | 0.80659100  | 1.48354000  | -3.24136500 |
| O | -0.84409400 | -0.89326800 | -1.24572400 |
| O | 0.83132700  | 0.90328400  | 1.24708200  |

4Sa compound

|   |             |             |             |
|---|-------------|-------------|-------------|
| C | 2.52871300  | 1.05431500  | -1.31914900 |
| C | 1.34013100  | 0.40065500  | -0.98794500 |
| C | 0.32188800  | 1.25098500  | -0.53117000 |
| C | 2.51324000  | 2.43759300  | -1.14409500 |
| C | -0.98476600 | 0.94021700  | -0.11704100 |
| C | -3.17611800 | -0.24639100 | 0.49588400  |
| C | -3.19159000 | 1.13688800  | 0.67093900  |
| C | -2.00300800 | 1.79054700  | 0.33973500  |
| C | -4.21398300 | -1.20650900 | 0.73738700  |
| C | 3.55110400  | 3.39771200  | -1.38559900 |
| C | -4.02725500 | -2.59355200 | 0.50423600  |
| C | -5.03888500 | -3.51328800 | 0.74158600  |
| C | -6.28622700 | -3.10547000 | 1.22176400  |
| C | -6.49226100 | -1.74016300 | 1.45891300  |
| C | -5.48888900 | -0.81432200 | 1.22513700  |
| C | 3.36437500  | 4.78475500  | -1.15245100 |
| C | 4.37600500  | 5.70449200  | -1.38980100 |
| C | 5.62334800  | 5.29667300  | -1.86997700 |
| C | 5.82938200  | 3.93136600  | -2.10712300 |
| C | 4.82601200  | 3.00552500  | -1.87334600 |
| S | -1.57855200 | -0.73402100 | -0.11689800 |
| S | 0.91567400  | 2.92522400  | -0.53131400 |
| H | 3.40073900  | 0.52772700  | -1.68576400 |
| H | 1.19937000  | -0.66934300 | -1.07064700 |
| H | -4.06361600 | 1.66347600  | 1.03755400  |
| H | -1.86224600 | 2.86054500  | 0.42243800  |
| H | -3.07113400 | -2.94292200 | 0.13181700  |
| H | -4.85186400 | -4.56537900 | 0.54911000  |
| H | -7.07431500 | -3.82638300 | 1.40609800  |
| H | -7.45234100 | -1.39635500 | 1.83205000  |
| H | -5.68338000 | 0.23353500  | 1.41952700  |
| H | 2.40825300  | 5.13412500  | -0.78003400 |
| H | 4.18898300  | 6.75658200  | -1.19732800 |
| H | 6.41143500  | 6.01758700  | -2.05431300 |
| H | 6.78946400  | 3.58755800  | -2.48025800 |
| H | 5.02050400  | 1.95766800  | -2.06773400 |

4Sb compound

|   |             |             |             |
|---|-------------|-------------|-------------|
| C | 1.24530800  | 0.97486600  | 0.87611000  |
| C | 0.19104000  | 0.08718700  | 0.67067000  |
| C | -0.18775000 | -0.09173800 | -0.67530000 |
| C | 1.74240900  | 1.53476900  | -0.31168600 |
| C | -1.73912000 | -1.53931800 | 0.30705700  |
| C | -1.24201900 | -0.97941500 | -0.88074000 |
| C | -2.80134300 | -2.47621900 | 0.48762400  |
| C | 2.80463200  | 2.47166900  | -0.49225300 |
| C | -3.18716300 | -2.95078600 | 1.77218600  |
| C | -4.22056300 | -3.86061000 | 1.93191100  |
| C | -4.93048500 | -4.35227700 | 0.83032100  |
| C | -4.56732900 | -3.89813900 | -0.44583100 |
| C | -3.53736000 | -2.98980800 | -0.61860200 |
| C | 3.54064600  | 2.98526200  | 0.61397400  |
| C | 4.57061400  | 3.89359400  | 0.44120300  |
| C | 4.93377400  | 4.34772800  | -0.83495000 |
| C | 4.22385500  | 3.85605800  | -1.93654000 |
| C | 3.19045500  | 2.94623400  | -1.77681600 |
| H | 1.65119400  | 1.21845200  | 1.84792600  |
| H | -1.64790500 | -1.22300200 | -1.85255500 |
| H | -2.65981500 | -2.59200700 | 2.64891600  |
| H | -4.47913900 | -4.19403300 | 2.93268900  |
| H | -5.73790300 | -5.06363800 | 0.95946400  |
| H | -5.10072400 | -4.26250700 | -1.31906600 |
| H | -3.28658600 | -2.66287000 | -1.62059900 |
| H | 3.28986900  | 2.65832600  | 1.61597000  |
| H | 5.10400700  | 4.25796400  | 1.31443800  |
| H | 5.74119100  | 5.05909000  | -0.96409200 |
| H | 4.48243300  | 4.18947800  | -2.93731900 |
| H | 2.66311000  | 2.58745100  | -2.65354600 |
| S | -0.82108100 | -0.90158500 | 1.71412300  |
| S | 0.82437000  | 0.89703600  | -1.71875200 |

4Sc compound

|   |             |             |             |
|---|-------------|-------------|-------------|
| C | -5.41330700 | -1.15128200 | 0.13565100  |
| C | -6.43398300 | -2.12994000 | 0.23435000  |
| C | -7.76294100 | -1.74782500 | 0.36621500  |
| C | -8.13367000 | -0.39610000 | 0.40554600  |
| C | -7.14455000 | 0.59623700  | 0.31003700  |
| C | -5.81917700 | 0.21963500  | 0.17853100  |
| S | -4.42050800 | 1.29045000  | 0.04263600  |
| C | -3.29635300 | -0.10457400 | -0.07144400 |
| C | -4.01653800 | -1.30696600 | -0.00265000 |
| C | -1.92174000 | 0.11918700  | -0.20713600 |
| C | -1.20155400 | 1.32158000  | -0.27593500 |
| C | 0.19521400  | 1.16589600  | -0.41423500 |
| C | 0.60108600  | -0.20502100 | -0.45711100 |
| S | -0.79758400 | -1.27583700 | -0.32121200 |
| C | 1.21588900  | 2.14455400  | -0.51294000 |
| C | 2.54484700  | 1.76244000  | -0.64480700 |
| C | 2.91557800  | 0.41071500  | -0.68413300 |
| C | 1.92645900  | -0.58162200 | -0.58861900 |
| H | -6.16773000 | -3.18172200 | 0.20586800  |
| H | -8.53044000 | -2.51260900 | 0.44029600  |
| H | -9.17558600 | -0.11518100 | 0.50888100  |
| H | -7.41702000 | 1.64617300  | 0.33905700  |
| H | -3.52714700 | -2.27112600 | -0.05300100 |
| H | -1.69094700 | 2.28573900  | -0.22558800 |
| H | 0.94963500  | 3.19633600  | -0.48446200 |
| H | 3.31234500  | 2.52722500  | -0.71889100 |
| H | 3.95749300  | 0.12979700  | -0.78746900 |
| H | 2.19892900  | -1.63155800 | -0.61763600 |

*4Sd compound*

|   |             |             |             |
|---|-------------|-------------|-------------|
| C | 0.87381900  | 1.25049100  | -0.99896400 |
| C | 0.05257200  | 0.16032900  | -0.68314900 |
| C | -0.05259000 | -0.16031900 | 0.68314900  |
| C | 1.45003300  | 1.82293200  | 0.18930000  |
| C | -1.45005000 | -1.82292300 | -0.18930000 |
| C | -0.87383700 | -1.25048200 | 0.99896500  |
| C | -2.29779100 | -2.90972500 | -0.14599900 |
| C | -2.61784000 | -3.48839600 | 1.10383600  |
| C | -2.06773100 | -2.94671400 | 2.27406200  |
| C | -1.21264500 | -1.85244300 | 2.24441800  |
| C | 2.29777400  | 2.90973300  | 0.14599900  |
| C | 2.61782400  | 3.48840400  | -1.10383600 |
| C | 2.06771400  | 2.94672200  | -2.27406200 |
| C | 1.21262800  | 1.85245100  | -2.24441800 |
| H | -2.71523600 | -3.31701600 | -1.06115800 |
| H | -3.28286100 | -4.34285400 | 1.15176600  |
| H | -2.31629300 | -3.39441500 | 3.23233500  |
| H | -0.79921700 | -1.45070500 | 3.16309000  |
| H | 2.71522000  | 3.31702400  | 1.06115800  |
| H | 3.28284500  | 4.34286100  | -1.15176600 |
| H | 2.31627700  | 3.39442300  | -3.23233600 |
| H | 0.79920100  | 1.45071300  | -3.16309000 |
| S | -0.92417200 | -0.95182100 | -1.65798600 |
| S | 0.92415400  | 0.95183000  | 1.65798600  |



50a compound

|   |             |             |             |
|---|-------------|-------------|-------------|
| C | 0.54746600  | 1.20680000  | 0.45483800  |
| C | -0.73580500 | 1.18155300  | -0.03813400 |
| C | -1.33184400 | -0.02718100 | -0.49549000 |
| C | -0.53634000 | -1.20345300 | -0.41727200 |
| C | 0.74693100  | -1.17820500 | 0.07569900  |
| C | 1.34297000  | 0.03052900  | 0.53305500  |
| C | -2.65762700 | -0.06437700 | -1.00706100 |
| C | 2.66875300  | 0.06772400  | 1.04462600  |
| C | -3.46401800 | -1.08293800 | -1.50828700 |
| C | -4.69749700 | -0.50532100 | -1.86763100 |
| C | -4.62863800 | 0.84675900  | -1.58354800 |
| C | 3.47514400  | 1.08628600  | 1.54585300  |
| C | 4.70862300  | 0.50866800  | 1.90519600  |
| C | 4.63976500  | -0.84341100 | 1.62111300  |
| C | -5.54526800 | 1.93689600  | -1.72465200 |
| C | 5.55639400  | -1.93354800 | 1.76221700  |
| C | -5.19011700 | 3.25218200  | -1.33936000 |
| C | -6.08620500 | 4.30266400  | -1.48036000 |
| C | -7.36460800 | 4.09464900  | -2.00616300 |
| C | -7.72877500 | 2.79791000  | -2.39128900 |
| C | -6.84363300 | 1.74085400  | -2.25568000 |
| C | 5.20124300  | -3.24883400 | 1.37692500  |
| C | 6.09733100  | -4.29931600 | 1.51792500  |
| C | 7.37573500  | -4.09130100 | 2.04372800  |
| C | 7.73990100  | -2.79456200 | 2.42885400  |
| C | 6.85475900  | -1.73750600 | 2.29324500  |
| O | -3.37672500 | 1.11482300  | -1.05586700 |
| O | 3.38785200  | -1.11147500 | 1.09343200  |
| H | 0.96221700  | 2.15048200  | 0.79265000  |
| H | -1.31316700 | 2.09665400  | -0.08317100 |
| H | -0.95109100 | -2.14713400 | -0.75508500 |
| H | 1.32429300  | -2.09330600 | 0.12073600  |
| H | -3.18415600 | -2.11994100 | -1.59958900 |
| H | -5.54886200 | -1.01684900 | -2.28927700 |
| H | 3.19528200  | 2.12328900  | 1.63715400  |
| H | 5.55998800  | 1.02019600  | 2.32684200  |
| H | -4.20329800 | 3.42678600  | -0.93087900 |
| H | -5.78436100 | 5.29992900  | -1.17586500 |
| H | -8.06015200 | 4.91885400  | -2.11394000 |
| H | -8.71667700 | 2.61403600  | -2.80195400 |
| H | -7.14899500 | 0.74641300  | -2.56085600 |
| H | 4.21442400  | -3.42343800 | 0.96844400  |
| H | 5.79548800  | -5.29658100 | 1.21343100  |
| H | 8.07127900  | -4.91550600 | 2.15150500  |
| H | 8.72780300  | -2.61068800 | 2.83952000  |
| H | 7.16012100  | -0.74306500 | 2.59842200  |

50b compound

|   |             |             |             |
|---|-------------|-------------|-------------|
| C | 0.48227400  | -1.29990200 | 0.18746700  |
| C | -0.28321300 | -0.13390400 | -0.07100900 |
| C | 0.38404400  | 1.11654100  | -0.22779500 |
| C | 1.74763700  | 1.30087000  | -0.14848300 |
| C | 2.51312300  | 0.13487300  | 0.10999400  |
| C | 1.84586700  | -1.11557300 | 0.26677900  |
| C | 3.89237200  | -0.14501900 | 0.26882300  |
| C | 4.03280800  | -1.50457800 | 0.50937300  |
| O | 2.76721600  | -2.10085300 | 0.50745200  |
| C | -1.66246100 | 0.14598800  | -0.22983900 |
| C | -1.80289700 | 1.50554600  | -0.47038900 |
| O | -0.53730500 | 2.10182200  | -0.46846700 |
| C | 5.15583900  | -2.34928800 | 0.74298300  |
| C | -2.92592800 | 2.35025700  | -0.70399800 |
| C | 5.00647700  | -3.74364000 | 0.96665600  |
| C | 6.10882700  | -4.55284200 | 1.19278000  |
| C | 7.40603500  | -4.02391000 | 1.20839900  |
| C | 7.56872700  | -2.64837600 | 0.98898800  |
| C | 6.47777400  | -1.82724200 | 0.76178100  |
| C | -2.77656600 | 3.74460800  | -0.92767200 |
| C | -3.87891600 | 4.55381000  | -1.15379600 |
| C | -5.17612400 | 4.02487800  | -1.16941500 |
| C | -5.33881700 | 2.64934400  | -0.95000400 |
| C | -4.24786300 | 1.82821000  | -0.72279700 |
| H | 0.03026500  | -2.27524800 | 0.31528000  |
| H | 2.19964500  | 2.27621600  | -0.27629600 |
| H | 4.70294500  | 0.56495300  | 0.21491700  |
| H | -2.47303400 | -0.56398500 | -0.17593300 |
| H | 4.01073300  | -4.16771500 | 0.95783200  |
| H | 5.95889700  | -5.61523900 | 1.36032000  |
| H | 8.26399500  | -4.66199100 | 1.38579000  |
| H | 8.56469700  | -2.21571700 | 0.99651000  |
| H | 6.63241100  | -0.76735400 | 0.59512900  |
| H | -1.78082300 | 4.16868400  | -0.91884800 |
| H | -3.72898700 | 5.61620800  | -1.32133600 |
| H | -6.03408400 | 4.66295900  | -1.34680600 |
| H | -6.33478600 | 2.21668500  | -0.95752600 |
| H | -4.40250000 | 0.76832200  | -0.55614500 |

50c compound

|   |             |             |             |
|---|-------------|-------------|-------------|
| C | -5.53349200 | -1.65316100 | 1.38191500  |
| C | -5.66876400 | -0.24356800 | 1.34059300  |
| C | -6.83469400 | 0.42580000  | 1.64909300  |
| C | -7.94304600 | -0.35398100 | 2.02443800  |
| C | -7.84424500 | -1.74962600 | 2.07587600  |
| C | -6.65671200 | -2.41198400 | 1.76048900  |
| C | -4.18998400 | -1.92619100 | 0.99761900  |
| C | -3.56907200 | -0.70832000 | 0.74231800  |
| O | -4.48909900 | 0.32773800  | 0.95625300  |
| C | -2.26247900 | -0.34431400 | 0.33253200  |
| C | -1.87767000 | 1.01503700  | 0.13991200  |
| C | -0.60778700 | 1.35288400  | -0.25711900 |
| C | 0.39240400  | 0.36344100  | -0.49771000 |
| C | 0.00759500  | -0.99591100 | -0.30509100 |
| C | -1.26228800 | -1.33375800 | 0.09193900  |
| C | 1.69899800  | 0.72744600  | -0.90749400 |
| O | 2.61902200  | -0.30861200 | -1.12143600 |
| C | 3.79868900  | 0.26269400  | -1.50577200 |
| C | 3.66342000  | 1.67228800  | -1.54708300 |
| C | 2.31991200  | 1.94531800  | -1.16278700 |
| C | 4.96461800  | -0.40667400 | -1.81427500 |
| C | 6.07297100  | 0.37310600  | -2.18961400 |
| C | 5.97417400  | 1.76875300  | -2.24104200 |
| C | 4.78664200  | 2.43111100  | -1.92565100 |
| H | -6.88598500 | 1.50699200  | 1.60175800  |
| H | -8.87913500 | 0.13170800  | 2.27513700  |
| H | -8.71338900 | -2.33027200 | 2.36845400  |
| H | -6.60114600 | -3.49413900 | 1.80666500  |
| H | -3.72288500 | -2.89391700 | 0.91462800  |
| H | -2.61120600 | 1.79267000  | 0.31343200  |
| H | -0.35903700 | 2.40003700  | -0.39123600 |
| H | 0.74113100  | -1.77354300 | -0.47861200 |
| H | -1.51103800 | -2.38091000 | 0.22605600  |
| H | 1.85281600  | 2.91304500  | -1.07978800 |
| H | 5.01590600  | -1.48786700 | -1.76694800 |
| H | 7.00905900  | -0.11258200 | -2.44031600 |
| H | 6.84331900  | 2.34939800  | -2.53361500 |
| H | 4.73107800  | 3.51326600  | -1.97182000 |

50d compound

|   |             |             |             |
|---|-------------|-------------|-------------|
| C | 0.76164200  | 1.32190300  | 0.31725000  |
| C | 1.62015200  | 0.19920300  | 0.11844900  |
| C | 1.04837800  | -1.07139300 | -0.15966300 |
| C | -0.29930900 | -1.33366300 | -0.25939600 |
| C | -1.15781900 | -0.21096300 | -0.06059600 |
| C | -0.58604400 | 1.05963300  | 0.21751600  |
| C | -2.56895100 | -0.01806600 | -0.06988000 |
| C | -2.78610700 | 1.35824900  | 0.20263800  |
| O | -1.58540200 | 2.01315000  | 0.37713000  |
| C | 3.03128400  | 0.00630600  | 0.12773400  |
| C | 3.24844100  | -1.37000900 | -0.14478500 |
| O | 2.04773500  | -2.02491000 | -0.31927700 |
| C | -3.70147500 | -0.83704500 | -0.27547800 |
| C | -4.97125500 | -0.26088700 | -0.20201300 |
| C | -5.15001200 | 1.10057900  | 0.06881100  |
| C | -4.03058600 | 1.93943600  | 0.27802900  |
| C | 4.16380900  | 0.82528500  | 0.33333200  |
| C | 5.43358900  | 0.24912700  | 0.25986700  |
| C | 5.61234600  | -1.11233900 | -0.01095700 |
| C | 4.49292000  | -1.95119600 | -0.22017500 |
| H | 1.13889400  | 2.31293800  | 0.53185400  |
| H | -0.67656100 | -2.32469800 | -0.47400000 |
| H | -3.58588600 | -1.89417100 | -0.48654800 |
| H | -5.84511400 | -0.88615300 | -0.35931000 |
| H | -6.14930700 | 1.51770900  | 0.11926700  |
| H | -4.13983300 | 2.99653000  | 0.48933900  |
| H | 4.04821900  | 1.88241100  | 0.54440100  |
| H | 6.30744800  | 0.87439300  | 0.41716400  |
| H | 6.61164000  | -1.52946900 | -0.06141400 |
| H | 4.60216600  | -3.00829000 | -0.43148500 |

5Sa compound

|   |             |             |             |
|---|-------------|-------------|-------------|
| C | 0.80683200  | 1.40274700  | -0.07292500 |
| C | -0.43319700 | 1.43280500  | -0.66771700 |
| C | -1.02074100 | 0.27595900  | -1.24870000 |
| C | -0.24857900 | -0.91515000 | -1.17785900 |
| C | 0.99144900  | -0.94520800 | -0.58306600 |
| C | 1.57899300  | 0.21163700  | -0.00208300 |
| C | -2.30849100 | 0.29640800  | -1.86920500 |
| C | 2.86674300  | 0.19118900  | 0.61842200  |
| C | -3.01710700 | -0.74260300 | -2.47745300 |
| C | -4.26680300 | -0.37062100 | -2.99035200 |
| C | -4.59721100 | 0.96674400  | -2.81123400 |
| C | 3.57535900  | 1.23020000  | 1.22666900  |
| C | 4.82505500  | 0.85821700  | 1.73956800  |
| C | 5.15546300  | -0.47914700 | 1.56045100  |
| C | -5.78788500 | 1.67436900  | -3.21030400 |
| C | 6.34613600  | -1.18677300 | 1.95952300  |
| C | -5.96706100 | 3.05220400  | -2.94164500 |
| C | -7.11831900 | 3.72350200  | -3.33099400 |
| C | -8.14405100 | 3.05748600  | -4.00465000 |
| C | -7.98649200 | 1.69461400  | -4.28002500 |
| C | -6.83997600 | 1.01753900  | -3.89466900 |
| C | 6.52531100  | -2.56460800 | 1.69086600  |
| C | 7.67656800  | -3.23590600 | 2.08021600  |
| C | 8.70230100  | -2.56989100 | 2.75387000  |
| C | 8.54474300  | -1.20701800 | 3.02924300  |
| C | 7.39822900  | -0.52994200 | 2.64388600  |
| S | -3.27308800 | 1.77850900  | -1.96167200 |
| S | 3.83134000  | -1.29091200 | 0.71089000  |
| H | 1.20091200  | 2.31815400  | 0.35267000  |
| H | -0.97674400 | 2.37120400  | -0.69187900 |
| H | -0.64266000 | -1.83055700 | -1.60345300 |
| H | 1.53499700  | -1.88360700 | -0.55890400 |
| H | -2.62908000 | -1.74979400 | -2.54425900 |
| H | -4.92514200 | -1.07141600 | -3.48766900 |
| H | 3.18733200  | 2.23739100  | 1.29347500  |
| H | 5.48339400  | 1.55901200  | 2.23688600  |
| H | -5.18829400 | 3.59619000  | -2.41988400 |
| H | -7.21635200 | 4.78064600  | -3.10556500 |
| H | -9.04182100 | 3.58364500  | -4.30760500 |
| H | -8.76997400 | 1.15500700  | -4.80279800 |
| H | -6.74890300 | -0.03721700 | -4.12362500 |
| H | 5.74654300  | -3.10859500 | 1.16910600  |
| H | 7.77460000  | -4.29305100 | 1.85478900  |
| H | 9.60007100  | -3.09605000 | 3.05682600  |
| H | 9.32822600  | -0.66741100 | 3.55201500  |
| H | 7.30715600  | 0.52481400  | 2.87283900  |

5Sb compound

|   |             |             |             |
|---|-------------|-------------|-------------|
| C | -1.00244900 | 0.15144000  | -0.93689800 |
| C | -1.33964700 | -0.26790900 | 0.39234000  |
| C | -0.28981700 | -0.41576800 | 1.33603900  |
| C | 1.00244300  | -0.15144000 | 0.93687900  |
| C | 1.33964100  | 0.26790900  | -0.39235900 |
| C | 0.28981200  | 0.41576800  | -1.33605800 |
| C | 3.50204200  | 0.24346500  | 0.57148600  |
| C | 2.72579800  | 0.47598800  | -0.55682700 |
| C | -3.50204700 | -0.24346800 | -0.57150700 |
| C | -2.72580300 | -0.47599000 | 0.55680800  |
| C | 4.92193500  | 0.36027800  | 0.73885000  |
| C | -4.92194000 | -0.36028400 | -0.73887100 |
| C | 5.56318100  | 0.07920800  | 1.97308300  |
| C | 6.93719300  | 0.19599300  | 2.12142000  |
| C | 7.74595800  | 0.59753700  | 1.05324400  |
| C | 7.13316400  | 0.88015200  | -0.17468700 |
| C | 5.76208700  | 0.76664900  | -0.33304200 |
| C | -5.56318600 | -0.07920800 | -1.97310300 |
| C | -6.93719800 | -0.19599600 | -2.12144100 |
| C | -7.74596300 | -0.59754600 | -1.05326600 |
| C | -7.13316800 | -0.88016700 | 0.17466200  |
| C | -5.76209200 | -0.76666200 | 0.33301800  |
| H | -0.51203400 | -0.73142100 | 2.34941200  |
| H | 0.51202800  | 0.73142100  | -2.34943100 |
| H | 3.15370700  | 0.79476200  | -1.49872900 |
| H | -3.15371300 | -0.79476400 | 1.49870900  |
| H | 4.96520100  | -0.23469200 | 2.82104000  |
| H | 7.38597700  | -0.02924400 | 3.08402600  |
| H | 8.81944100  | 0.68796600  | 1.17189800  |
| H | 7.73858400  | 1.19393900  | -1.01971200 |
| H | 5.32176100  | 0.99327800  | -1.29634800 |
| H | -4.96520700 | 0.23469700  | -2.82105800 |
| H | -7.38598200 | 0.02924500  | -3.08404600 |
| H | -8.81944600 | -0.68797800 | -1.17192100 |
| H | -7.73858800 | -1.19396000 | 1.01968600  |
| H | -5.32176500 | -0.99329600 | 1.29632300  |
| S | 2.45711800  | -0.26666500 | 1.93089300  |
| S | -2.45712300 | 0.26666400  | -1.93091300 |

5Sc compound

|   |             |             |             |
|---|-------------|-------------|-------------|
| C | -5.69254800 | -1.38192900 | 1.41402200  |
| C | -6.08437900 | -0.01259900 | 1.45119000  |
| C | -7.36602100 | 0.37989400  | 1.80979500  |
| C | -8.30677700 | -0.59978600 | 2.14648700  |
| C | -7.94553500 | -1.95459200 | 2.11752000  |
| C | -6.66305300 | -2.34891200 | 1.75880100  |
| C | -4.33920800 | -1.55226500 | 1.02137500  |
| C | -3.65513500 | -0.37195600 | 0.74944200  |
| S | -4.74335300 | 1.03000000  | 0.99184400  |
| C | -2.30483800 | -0.17485900 | 0.33604500  |
| C | -1.75263400 | 1.11622200  | 0.09746000  |
| C | -0.45005100 | 1.29425000  | -0.30077700 |
| C | 0.43476400  | 0.19398600  | -0.50122000 |
| C | -0.11744000 | -1.09709500 | -0.26263500 |
| C | -1.42002300 | -1.27512400 | 0.13560200  |
| C | 1.78506100  | 0.39108200  | -0.91461700 |
| S | 2.87327800  | -1.01087400 | -1.15701900 |
| C | 4.21430500  | 0.03172500  | -1.61636500 |
| C | 3.82247400  | 1.40105500  | -1.57919700 |
| C | 2.46913400  | 1.57139200  | -1.18655000 |
| C | 5.49594700  | -0.36076800 | -1.97496900 |
| C | 6.43670400  | 0.61891200  | -2.31166000 |
| C | 6.07546200  | 1.97371800  | -2.28269200 |
| C | 4.79298000  | 2.36803800  | -1.92397300 |
| H | -7.63518100 | 1.43044600  | 1.82898600  |
| H | -9.31217800 | -0.30896900 | 2.42875300  |
| H | -8.68130700 | -2.70806600 | 2.38010300  |
| H | -6.39863600 | -3.40117200 | 1.74114000  |
| H | -3.87359900 | -2.52483700 | 0.93940300  |
| H | -2.37804900 | 1.99242900  | 0.23353600  |
| H | -0.08931500 | 2.30273100  | -0.46591500 |
| H | 0.50797500  | -1.97330300 | -0.39871100 |
| H | -1.78075900 | -2.28360500 | 0.30074000  |
| H | 2.00352600  | 2.54396300  | -1.10457700 |
| H | 5.76510700  | -1.41132000 | -1.99416100 |
| H | 7.44210500  | 0.32809500  | -2.59392500 |
| H | 6.81123400  | 2.72719200  | -2.54527300 |
| H | 4.52856400  | 3.42029800  | -1.90631100 |

*5Sd compound*

|   |             |             |             |
|---|-------------|-------------|-------------|
| C | 1.29497200  | 0.05167700  | 0.58777600  |
| C | 2.66715800  | 0.05208500  | 0.97042400  |
| C | 3.55080900  | -0.24769500 | -0.10765100 |
| C | 1.09851400  | -0.24848600 | -0.79187400 |
| C | -0.14288400 | -0.30589900 | -1.39013000 |
| C | -1.29497200 | -0.05167700 | -0.58777500 |
| C | -1.09851400 | 0.24848600  | 0.79187400  |
| C | 0.14288400  | 0.30589900  | 1.39013000  |
| C | 3.24911300  | 0.30268800  | 2.23806200  |
| C | 4.62966300  | 0.25148800  | 2.39491400  |
| C | 5.47620800  | -0.04544000 | 1.31907900  |
| C | 4.92393200  | -0.29847700 | 0.04902000  |
| C | -2.66715800 | -0.05208500 | -0.97042400 |
| C | -3.55080900 | 0.24769500  | 0.10765100  |
| C | -3.24911300 | -0.30268800 | -2.23806200 |
| C | -4.62966300 | -0.25148800 | -2.39491400 |
| C | -5.47620800 | 0.04544000  | -1.31907900 |
| C | -4.92393200 | 0.29847700  | -0.04902000 |
| H | -0.24885400 | -0.53775900 | -2.44307000 |
| H | 0.24885400  | 0.53775900  | 2.44307000  |
| H | 2.61249900  | 0.53445900  | 3.08472700  |
| H | 5.05998100  | 0.44597200  | 3.37277700  |
| H | 6.55052900  | -0.08116300 | 1.45926700  |
| H | 5.56657100  | -0.52976000 | -0.79376200 |
| H | -2.61249900 | -0.53445900 | -3.08472700 |
| H | -5.05998100 | -0.44597200 | -3.37277700 |
| H | -6.55052900 | 0.08116300  | -1.45926800 |
| H | -5.56657100 | 0.52976000  | 0.79376200  |
| S | 2.65347500  | -0.53174500 | -1.61071900 |
| S | -2.65347500 | 0.53174500  | 1.61071900  |



#### 4. $S_1$ ground state

##### 40a compound

|   |             |             |             |
|---|-------------|-------------|-------------|
| C | 2.77569500  | -0.46897100 | -0.77944000 |
| C | 1.53381400  | -1.05293100 | -0.53320700 |
| C | 0.66712200  | -0.01062400 | -0.20378600 |
| C | 2.63313500  | 0.90523400  | -0.59480000 |
| C | -0.68775300 | 0.02108700  | 0.13761700  |
| C | -2.65372000 | -0.89478700 | 0.52881700  |
| C | -2.79628200 | 0.47941900  | 0.71344400  |
| C | -1.55447600 | 1.06341000  | 0.46690700  |
| C | -3.55769700 | -1.98907200 | 0.63568400  |
| C | 3.53720700  | 1.99947800  | -0.70126900 |
| C | -3.12898100 | -3.31479200 | 0.38455500  |
| C | -4.01739000 | -4.36844800 | 0.49188000  |
| C | -5.34851500 | -4.14558900 | 0.84852000  |
| C | -5.78360300 | -2.83973300 | 1.09910800  |
| C | -4.90990500 | -1.77658200 | 0.99646300  |
| C | 3.10851700  | 3.32518200  | -0.45000600 |
| C | 3.99702800  | 4.37879500  | -0.55689800 |
| C | 5.32824500  | 4.15590400  | -0.91317500 |
| C | 5.76331400  | 2.85006200  | -1.16386900 |
| C | 4.88949800  | 1.78696000  | -1.06171800 |
| O | -1.35974500 | -1.16824400 | 0.17626600  |
| O | 1.33912600  | 1.17870200  | -0.24238300 |
| H | 3.68603400  | -0.97484500 | -1.06122000 |
| H | 1.26485300  | -2.09694900 | -0.57935300 |
| H | -3.70656400 | 0.98527000  | 0.99545100  |
| H | -1.28552500 | 2.10743300  | 0.51300600  |
| H | -2.09666000 | -3.49418400 | 0.10724800  |
| H | -3.67279000 | -5.37908100 | 0.29599300  |
| H | -6.04015900 | -4.97723100 | 0.93084300  |
| H | -6.81698000 | -2.65789800 | 1.37693500  |
| H | -5.26364100 | -0.77004900 | 1.19422200  |
| H | 2.07613000  | 3.50459600  | -0.17296000 |
| H | 3.65244500  | 5.38941600  | -0.36092100 |
| H | 6.01996800  | 4.98751300  | -0.99516400 |
| H | 6.79674800  | 2.66820800  | -1.44146800 |
| H | 5.24320400  | 0.78044400  | -1.25962200 |

4Ob compound

|   |             |             |             |
|---|-------------|-------------|-------------|
| C | 0.96791600  | 0.96063100  | 1.08741500  |
| C | -0.00749100 | 0.05238300  | 0.69549300  |
| C | 0.01606500  | -0.06046200 | -0.68753100 |
| C | 1.55890900  | 1.37085100  | -0.12212700 |
| C | -1.55033000 | -1.37893600 | 0.13009100  |
| C | -0.95935700 | -0.96869500 | -1.07945400 |
| C | -2.60164500 | -2.29007800 | 0.40773000  |
| C | 2.61023700  | 2.28198100  | -0.39976300 |
| C | -3.02421300 | -2.53853100 | 1.73845900  |
| C | -4.04901100 | -3.42853600 | 1.99011400  |
| C | -4.68724900 | -4.09929900 | 0.94127300  |
| C | -4.27957100 | -3.86280500 | -0.37560000 |
| C | -3.25738600 | -2.97714700 | -0.64824500 |
| C | 3.03288800  | 2.53034400  | -1.73048200 |
| C | 4.05771700  | 3.42031500  | -1.98213200 |
| C | 4.69587700  | 4.09116400  | -0.93329800 |
| C | 4.28810900  | 3.85476600  | 0.38356400  |
| C | 3.26591000  | 2.96912200  | 0.65620600  |
| H | 1.24236200  | 1.30084200  | 2.07212800  |
| H | -1.23381400 | -1.30889300 | -2.06416800 |
| H | -2.53335400 | -2.02168700 | 2.55499800  |
| H | -4.36054700 | -3.60752200 | 3.01439400  |
| H | -5.49182100 | -4.79727300 | 1.14702400  |
| H | -4.77060900 | -4.37995700 | -1.19399700 |
| H | -2.95425200 | -2.80594400 | -1.67588200 |
| H | 2.54207900  | 2.01344600  | -2.54701800 |
| H | 4.36932300  | 3.59922500  | -3.00640500 |
| H | 5.50046200  | 4.78912300  | -1.13904600 |
| H | 4.77908900  | 4.37198100  | 1.20195700  |
| H | 2.96271400  | 2.79798700  | 1.68383500  |
| O | -0.95716200 | -0.74434900 | 1.21847700  |
| O | 0.96575200  | 0.73625300  | -1.21051300 |

4Oc compound

|   |             |             |             |
|---|-------------|-------------|-------------|
| C | -5.19414200 | -1.35755300 | 0.11334500  |
| C | -6.30907400 | -2.22708700 | 0.22162700  |
| C | -7.56494600 | -1.66432700 | 0.34674600  |
| C | -7.75473200 | -0.27090600 | 0.36834600  |
| C | -6.67365400 | 0.61441700  | 0.26342600  |
| C | -5.42671600 | 0.04382000  | 0.13914900  |
| O | -4.25416800 | 0.72329700  | 0.02478600  |
| C | -3.26443900 | -0.22510000 | -0.07481400 |
| C | -3.80573200 | -1.51673600 | -0.02399100 |
| C | -1.95360500 | 0.23971400  | -0.20327700 |
| C | -1.41232700 | 1.53135000  | -0.25425600 |
| C | -0.02394100 | 1.37216700  | -0.39184000 |
| C | 0.20863800  | -0.02920600 | -0.41758600 |
| O | -0.96388600 | -0.70868300 | -0.30298000 |
| C | 1.09096400  | 2.24170100  | -0.50039400 |
| C | 2.34681900  | 1.67894200  | -0.62568200 |
| C | 2.53661700  | 0.28552000  | -0.64716100 |
| C | 1.45556400  | -0.59980300 | -0.54198200 |
| H | -6.17436300 | -3.30284900 | 0.20614100  |
| H | -8.43296200 | -2.31024900 | 0.43111900  |
| H | -8.75862100 | 0.12796000  | 0.46827100  |
| H | -6.80497000 | 1.68985200  | 0.27858700  |
| H | -3.23191800 | -2.42903900 | -0.08248300 |
| H | -1.98614300 | 2.44365300  | -0.19578500 |
| H | 0.95624500  | 3.31746400  | -0.48498500 |
| H | 3.21481400  | 2.32486400  | -0.71026800 |
| H | 3.54049400  | -0.11334600 | -0.74720300 |
| H | 1.58688800  | -1.67523800 | -0.55705600 |

*4Od compound*

|   |             |             |             |
|---|-------------|-------------|-------------|
| C | 0.77349000  | 1.14756900  | -1.08622300 |
| C | -0.03173800 | 0.06821300  | -0.70056000 |
| C | 0.01902400  | -0.05823800 | 0.70191200  |
| C | 1.27922800  | 1.62324900  | 0.15511800  |
| C | -1.29195700 | -1.61326100 | -0.15376400 |
| C | -0.78623900 | -1.13756600 | 1.08757900  |
| C | -2.14385000 | -2.68375200 | -0.26997500 |
| C | -2.51235400 | -3.31863500 | 0.94060800  |
| C | -2.03365900 | -2.87647400 | 2.17541200  |
| C | -1.17139500 | -1.79214700 | 2.28704200  |
| C | 2.13112400  | 2.69373700  | 0.27132900  |
| C | 2.49959300  | 3.32864700  | -0.93925000 |
| C | 2.02084700  | 2.88652600  | -2.17404900 |
| C | 1.15857400  | 1.80220600  | -2.28567900 |
| H | -2.50845900 | -3.01743100 | -1.23304300 |
| H | -3.18377100 | -4.16963500 | 0.90263200  |
| H | -2.34662100 | -3.39801500 | 3.07401000  |
| H | -0.80211800 | -1.45204300 | 3.24664000  |
| H | 2.49575400  | 3.02739900  | 1.23439400  |
| H | 3.17101700  | 4.17964200  | -0.90127600 |
| H | 2.33377100  | 3.40809800  | -3.07264300 |
| H | 0.78925500  | 1.46213500  | -3.24527100 |
| O | -0.82112500 | -0.86516100 | -1.23751400 |
| O | 0.80840900  | 0.87513800  | 1.23886600  |

4Sa compound

|   |             |             |             |
|---|-------------|-------------|-------------|
| C | 2.50701200  | 1.02256300  | -1.31608300 |
| C | 1.32443100  | 0.37585200  | -0.98814100 |
| C | 0.32049000  | 1.24784000  | -0.53567900 |
| C | 2.47181900  | 2.41003100  | -1.13411100 |
| C | -0.98632000 | 0.94441800  | -0.12101500 |
| C | -3.13558500 | -0.21850800 | 0.48333900  |
| C | -3.17129700 | 1.16913700  | 0.66385300  |
| C | -1.98987100 | 1.81626100  | 0.33258500  |
| C | -4.17099600 | -1.18012500 | 0.72578800  |
| C | 3.50826100  | 3.37128000  | -1.37359700 |
| C | -3.96747500 | -2.55964600 | 0.49127800  |
| C | -4.97242200 | -3.47947600 | 0.72814100  |
| C | -6.21464600 | -3.06449700 | 1.20581800  |
| C | -6.43548900 | -1.70642600 | 1.44370800  |
| C | -5.43836500 | -0.77933700 | 1.21038600  |
| C | 3.30711500  | 4.74996900  | -1.13223900 |
| C | 4.31295300  | 5.66947800  | -1.36654500 |
| C | 5.55379200  | 5.25497700  | -1.84822100 |
| C | 5.77230300  | 3.89772400  | -2.09283000 |
| C | 4.77421600  | 2.97097900  | -1.86227500 |
| S | -1.56879800 | -0.70857100 | -0.11964400 |
| S | 0.90386400  | 2.90051300  | -0.53450500 |
| H | 3.38381900  | 0.50395100  | -1.68104300 |
| H | 1.17235800  | -0.69405500 | -1.06654300 |
| H | -4.04741000 | 1.68749500  | 1.03083400  |
| H | -1.83819600 | 2.88630700  | 0.40985800  |
| H | -3.00766200 | -2.90573300 | 0.11941300  |
| H | -4.78820400 | -4.53229400 | 0.53927500  |
| H | -7.00108900 | -3.78841300 | 1.39072200  |
| H | -7.39870800 | -1.37163400 | 1.81553400  |
| H | -5.63540700 | 0.26929200  | 1.40287200  |
| H | 2.34859400  | 5.09560700  | -0.75664500 |
| H | 4.13058600  | 6.72164800  | -1.17234500 |
| H | 6.34095500  | 5.97863500  | -2.03105900 |
| H | 6.73435700  | 3.56333600  | -2.46802300 |
| H | 4.96920500  | 1.92306900  | -2.06067300 |

4Sb compound

|   |             |             |             |
|---|-------------|-------------|-------------|
| C | 1.23247600  | 0.96080900  | 0.89018700  |
| C | 0.18321300  | 0.07887000  | 0.67758800  |
| C | -0.18015500 | -0.08315200 | -0.68218300 |
| C | 1.71530500  | 1.51114400  | -0.30809700 |
| C | -1.71219000 | -1.51549300 | 0.30349400  |
| C | -1.22939700 | -0.96511600 | -0.89478600 |
| C | -2.77388000 | -2.45185300 | 0.48075500  |
| C | 2.77708900  | 2.44739500  | -0.48537200 |
| C | -3.14482600 | -2.91546000 | 1.76895800  |
| C | -4.17421400 | -3.82218500 | 1.92969300  |
| C | -4.87553800 | -4.30467300 | 0.82305300  |
| C | -4.52591100 | -3.86053400 | -0.45553800 |
| C | -3.49971100 | -2.95487800 | -0.63108500 |
| C | 3.50305600  | 2.95026800  | 0.62644900  |
| C | 4.52937500  | 3.85578500  | 0.45088400  |
| C | 4.87901900  | 4.29990100  | -0.82771100 |
| C | 4.17758900  | 3.81753300  | -1.93433600 |
| C | 3.14805800  | 2.91097300  | -1.77357900 |
| H | 1.64358500  | 1.20757900  | 1.85900000  |
| H | -1.64049600 | -1.21189800 | -1.86359900 |
| H | -2.61311800 | -2.55366100 | 2.64407800  |
| H | -4.43724700 | -4.16021600 | 2.92696300  |
| H | -5.68334500 | -5.01678500 | 0.95375800  |
| H | -5.06523400 | -4.22986300 | -1.32211000 |
| H | -3.24828900 | -2.62634500 | -1.63335300 |
| H | 3.25166300  | 2.62170400  | 1.62871500  |
| H | 5.06880200  | 4.22499600  | 1.31744100  |
| H | 5.68693200  | 5.01189000  | -0.95843200 |
| H | 4.44063500  | 4.15554500  | -2.93160800 |
| H | 2.61626000  | 2.54927500  | -2.64868600 |
| S | -0.81898800 | -0.90091100 | 1.70597400  |
| S | 0.82210000  | 0.89656600  | -1.71057700 |

4Sc compound

|   |             |             |             |
|---|-------------|-------------|-------------|
| C | -5.38201300 | -1.15065500 | 0.13491700  |
| C | -6.40076700 | -2.13217900 | 0.23872000  |
| C | -7.70157700 | -1.74339100 | 0.36840300  |
| C | -8.05406200 | -0.38264900 | 0.40129700  |
| C | -7.08462000 | 0.60731900  | 0.30256200  |
| C | -5.76819200 | 0.22718000  | 0.17121900  |
| S | -4.39066000 | 1.28747000  | 0.03119300  |
| C | -3.29858200 | -0.09542100 | -0.07610000 |
| C | -4.00048300 | -1.31363600 | -0.00415800 |
| C | -1.92142900 | 0.10990900  | -0.21193200 |
| C | -1.22000800 | 1.32816500  | -0.28804500 |
| C | 0.16245000  | 1.16530800  | -0.41861600 |
| C | 0.54987000  | -0.21265600 | -0.44657600 |
| S | -0.82806300 | -1.27283500 | -0.30719900 |
| C | 1.18156900  | 2.14728400  | -0.52145100 |
| C | 2.48500400  | 1.75831400  | -0.64361000 |
| C | 2.83856400  | 0.39712600  | -0.66927100 |
| C | 1.86848900  | -0.59318100 | -0.57016200 |
| H | -6.13499800 | -3.18366300 | 0.21417100  |
| H | -8.48062700 | -2.49390900 | 0.44782700  |
| H | -9.09604500 | -0.10022700 | 0.50490600  |
| H | -7.36164900 | 1.65549800  | 0.32839900  |
| H | -3.50087500 | -2.27393100 | -0.05630900 |
| H | -1.72098500 | 2.28837200  | -0.24881200 |
| H | 0.91497000  | 3.19872700  | -0.50173100 |
| H | 3.26414200  | 2.50892800  | -0.72226400 |
| H | 3.88112400  | 0.11472600  | -0.76753700 |
| H | 2.14615300  | -1.64139200 | -0.59003900 |

*4Sd compound*

|   |             |             |             |
|---|-------------|-------------|-------------|
| C | 0.87606500  | 1.25548900  | -1.01470100 |
| C | 0.04754500  | 0.15473900  | -0.68946100 |
| C | -0.04755100 | -0.15473900 | 0.68945900  |
| C | 1.43974600  | 1.81319800  | 0.16455400  |
| C | -1.43975500 | -1.81319600 | -0.16455500 |
| C | -0.87607500 | -1.25548600 | 1.01470000  |
| C | -2.28793700 | -2.89659100 | -0.15002600 |
| C | -2.60667600 | -3.47399300 | 1.10284900  |
| C | -2.06803700 | -2.94635000 | 2.26844800  |
| C | -1.20748600 | -1.84677500 | 2.25093800  |
| C | 2.28792500  | 2.89659600  | 0.15002600  |
| C | 2.60665400  | 3.47400700  | -1.10284800 |
| C | 2.06801200  | 2.94636500  | -2.26844700 |
| C | 1.20747100  | 1.84678300  | -2.25093900 |
| H | -2.70239900 | -3.29983600 | -1.06710300 |
| H | -3.27221100 | -4.32815000 | 1.14405100  |
| H | -2.32036200 | -3.39826900 | 3.22242500  |
| H | -0.79911500 | -1.45222800 | 3.17489000  |
| H | 2.70238500  | 3.29984100  | 1.06710300  |
| H | 3.27217900  | 4.32817000  | -1.14404900 |
| H | 2.32033000  | 3.39829000  | -3.22242300 |
| H | 0.79909800  | 1.45223700  | -3.17489100 |
| S | -0.90347300 | -0.93203200 | -1.61073200 |
| S | 0.90346700  | 0.93203200  | 1.61073000  |



50a compound

|   |             |             |             |
|---|-------------|-------------|-------------|
| C | 0.54401900  | 1.21289200  | 0.45410900  |
| C | -0.73412400 | 1.18590700  | -0.03743800 |
| C | -1.31684800 | -0.02833300 | -0.49018100 |
| C | -0.53292300 | -1.20959700 | -0.41653000 |
| C | 0.74521800  | -1.18261200 | 0.07502700  |
| C | 1.32794200  | 0.03162900  | 0.52776700  |
| C | -2.63756800 | -0.06456400 | -0.99976900 |
| C | 2.64865800  | 0.06787100  | 1.03736500  |
| C | -3.43871400 | -1.09057700 | -1.50017500 |
| C | -4.66029100 | -0.51636100 | -1.85569700 |
| C | -4.57693900 | 0.83849700  | -1.56570000 |
| C | 3.44978300  | 1.09389500  | 1.53778500  |
| C | 4.67136300  | 0.51969600  | 1.89332100  |
| C | 4.58802900  | -0.83516400 | 1.60333300  |
| C | -5.49261900 | 1.92588500  | -1.70695200 |
| C | 5.50374000  | -1.92253200 | 1.74455300  |
| C | -5.13115500 | 3.23446400  | -1.32037100 |
| C | -6.02658100 | 4.27994500  | -1.46178200 |
| C | -7.29891600 | 4.06018000  | -1.98745300 |
| C | -7.66785700 | 2.76924300  | -2.37353200 |
| C | -6.78393900 | 1.71658300  | -2.23779400 |
| C | 5.14233500  | -3.23109900 | 1.35787800  |
| C | 6.03780200  | -4.27655200 | 1.49922700  |
| C | 7.31012300  | -4.05677000 | 2.02492600  |
| C | 7.67900400  | -2.76584600 | 2.41110200  |
| C | 6.79504300  | -1.71321400 | 2.27543000  |
| O | -3.34436900 | 1.10408100  | -1.04604300 |
| O | 3.35547000  | -1.10076600 | 1.08365900  |
| H | 0.96261700  | 2.15475700  | 0.79251300  |
| H | -1.31643600 | 2.09847400  | -0.08549800 |
| H | -0.95151700 | -2.15145900 | -0.75494500 |
| H | 1.32753800  | -2.09517600 | 0.12306600  |
| H | -3.15673400 | -2.12831000 | -1.59068100 |
| H | -5.51551100 | -1.02167500 | -2.27754600 |
| H | 3.16779000  | 2.13162500  | 1.62828100  |
| H | 5.52657600  | 1.02502400  | 2.31516800  |
| H | -4.14346900 | 3.41162600  | -0.91105400 |
| H | -5.73181000 | 5.27991200  | -1.15928600 |
| H | -7.99668200 | 4.88364100  | -2.09597600 |
| H | -8.65630000 | 2.58847500  | -2.78376400 |
| H | -7.08639400 | 0.72014900  | -2.54239000 |
| H | 4.15466200  | -3.40827400 | 0.94853500  |
| H | 5.74307900  | -5.27651000 | 1.19665400  |
| H | 8.00792400  | -4.88020800 | 2.13339600  |
| H | 8.66743300  | -2.58506500 | 2.82136300  |
| H | 7.09745300  | -0.71678700 | 2.58009600  |

50b compound

|   |             |             |             |
|---|-------------|-------------|-------------|
| C | 0.48247700  | -1.30584400 | 0.18887500  |
| C | -0.27095400 | -0.13185900 | -0.07027100 |
| C | 0.39392600  | 1.11865400  | -0.22745800 |
| C | 1.74741200  | 1.30686800  | -0.14958300 |
| C | 2.50084200  | 0.13288500  | 0.10956700  |
| C | 1.83596200  | -1.11762900 | 0.26675100  |
| C | 3.86853700  | -0.14416500 | 0.26708800  |
| C | 3.98763300  | -1.51404700 | 0.50789200  |
| O | 2.75267900  | -2.09682600 | 0.50623800  |
| C | -1.63864300 | 0.14517800  | -0.22785800 |
| C | -1.75773700 | 1.51505500  | -0.46869200 |
| O | -0.52278800 | 2.09784300  | -0.46698600 |
| C | 5.11632000  | -2.34931100 | 0.74017900  |
| C | -2.88641400 | 2.35029100  | -0.70113100 |
| C | 4.96640800  | -3.73875300 | 0.96273100  |
| C | 6.07279100  | -4.53408600 | 1.18640300  |
| C | 7.35787900  | -3.98246600 | 1.19705000  |
| C | 7.51889500  | -2.61173500 | 0.97863000  |
| C | 6.42347800  | -1.80207200 | 0.75340900  |
| C | -2.73649700 | 3.73971500  | -0.92379100 |
| C | -3.84286300 | 4.53500400  | -1.14770600 |
| C | -5.12794000 | 3.98336000  | -1.15847300 |
| C | -5.28896600 | 2.61265800  | -0.93988200 |
| C | -4.19356600 | 1.80303900  | -0.71442000 |
| H | 0.02294200  | -2.27790700 | 0.31569400  |
| H | 2.20695000  | 2.27892500  | -0.27644600 |
| H | 4.68726800  | 0.55663700  | 0.21515600  |
| H | -2.45736900 | -0.55563400 | -0.17598100 |
| H | 3.97249700  | -4.17107000 | 0.95547400  |
| H | 5.94036400  | -5.59807500 | 1.35537600  |
| H | 8.22269000  | -4.61307700 | 1.37337600  |
| H | 8.51316400  | -2.17628500 | 0.98541600  |
| H | 6.56619300  | -0.73979300 | 0.58552600  |
| H | -1.74259300 | 4.17204600  | -0.91646300 |
| H | -3.71042900 | 5.59897300  | -1.31680400 |
| H | -5.99273500 | 4.61393300  | -1.33501500 |
| H | -6.28322700 | 2.17719200  | -0.94674900 |
| H | -4.33628700 | 0.74077800  | -0.54642600 |

50c compound

|   |             |             |             |
|---|-------------|-------------|-------------|
| C | -5.49275700 | -1.63847900 | 1.36915600  |
| C | -5.62654200 | -0.23133700 | 1.32741900  |
| C | -6.79055700 | 0.43724500  | 1.63513900  |
| C | -7.88222300 | -0.35195700 | 2.00583600  |
| C | -7.78705400 | -1.75202600 | 2.05869600  |
| C | -6.61105000 | -2.40995600 | 1.74677500  |
| C | -4.16174500 | -1.90653200 | 0.98848300  |
| C | -3.55686200 | -0.67509400 | 0.73709500  |
| O | -4.45630400 | 0.34148300  | 0.94590600  |
| C | -2.24797900 | -0.32428800 | 0.32734300  |
| C | -1.86859300 | 1.02983200  | 0.13643800  |
| C | -0.59920100 | 1.35606700  | -0.25990000 |
| C | 0.37799200  | 0.34343100  | -0.49222700 |
| C | -0.00139000 | -1.01068700 | -0.30130600 |
| C | -1.27077300 | -1.33692100 | 0.09506200  |
| C | 1.68685800  | 0.69423400  | -0.90203600 |
| O | 2.58617700  | -0.32236700 | -1.11125900 |
| C | 3.75639500  | 0.25044900  | -1.49283700 |
| C | 3.62273200  | 1.65761500  | -1.53416800 |
| C | 2.29181300  | 1.92568600  | -1.15318200 |
| C | 4.92029000  | -0.41815600 | -1.80096000 |
| C | 6.01196100  | 0.37104600  | -2.17164000 |
| C | 5.91691800  | 1.77114000  | -2.22407800 |
| C | 4.74103400  | 2.42909300  | -1.91175600 |
| H | -6.85093400 | 1.51834600  | 1.59044700  |
| H | -8.82197800 | 0.12781000  | 2.25775400  |
| H | -8.65961000 | -2.32663900 | 2.35175400  |
| H | -6.54774300 | -3.49183000 | 1.79066900  |
| H | -3.68460100 | -2.87075200 | 0.90241100  |
| H | -2.60137700 | 1.80930400  | 0.30951200  |
| H | -0.33479300 | 2.39853200  | -0.39862200 |
| H | 0.73139300  | -1.79016000 | -0.47438600 |
| H | -1.53518400 | -2.37938600 | 0.23377400  |
| H | 1.81478200  | 2.88992700  | -1.06673300 |
| H | 4.98057600  | -1.49927600 | -1.75657500 |
| H | 6.95162200  | -0.10873900 | -2.42387300 |
| H | 6.78947800  | 2.34575400  | -2.51712200 |
| H | 4.67782900  | 3.51098700  | -1.95530900 |

*50d compound*

|   |             |             |             |
|---|-------------|-------------|-------------|
| C | 0.77190100  | 1.33101800  | 0.31960600  |
| C | 1.62079700  | 0.23573900  | 0.12600800  |
| C | 1.05280300  | -1.05403900 | -0.15589700 |
| C | -0.30957500 | -1.34282300 | -0.26152600 |
| C | -1.15847000 | -0.24753600 | -0.06797000 |
| C | -0.59047700 | 1.04223500  | 0.21397200  |
| C | -2.56996500 | -0.04436600 | -0.07527500 |
| C | -2.76916600 | 1.32119400  | 0.19568600  |
| O | -1.55436300 | 1.96141500  | 0.36778400  |
| C | 3.03229600  | 0.03259500  | 0.13318200  |
| C | 3.23149500  | -1.33297700 | -0.13772300 |
| O | 2.01668800  | -1.97321900 | -0.30971000 |
| C | -3.70008400 | -0.85133400 | -0.27844000 |
| C | -4.96171300 | -0.25669500 | -0.20092000 |
| C | -5.11783900 | 1.09903400  | 0.06955200  |
| C | -3.99404600 | 1.92794100  | 0.27692200  |
| C | 4.16242300  | 0.83960200  | 0.33615400  |
| C | 5.42405400  | 0.24497800  | 0.25856200  |
| C | 5.58017700  | -1.11076400 | -0.01184900 |
| C | 4.45637900  | -1.93970200 | -0.21906500 |
| H | 1.12289700  | 2.33164900  | 0.53522800  |
| H | -0.66057100 | -2.34345100 | -0.47716300 |
| H | -3.60026400 | -1.91007500 | -0.49042700 |
| H | -5.84348200 | -0.86976500 | -0.35604900 |
| H | -6.11139800 | 1.52909700  | 0.12282200  |
| H | -4.09003500 | 2.98597100  | 0.48887800  |
| H | 4.06260600  | 1.89835600  | 0.54808100  |
| H | 6.30582700  | 0.85807200  | 0.41356200  |
| H | 6.57373900  | -1.54081200 | -0.06519900 |
| H | 4.55236600  | -2.99774000 | -0.43098600 |

5Sa compound

|   |             |             |             |
|---|-------------|-------------|-------------|
| C | 0.79926200  | 1.41239100  | -0.07683300 |
| C | -0.43466300 | 1.43495500  | -0.67181400 |
| C | -1.00512500 | 0.26924600  | -1.24926300 |
| C | -0.23704000 | -0.92269000 | -1.18210800 |
| C | 0.99684000  | -0.94527900 | -0.58703300 |
| C | 1.56718000  | 0.22036500  | -0.00933500 |
| C | -2.28692300 | 0.28658000  | -1.86793700 |
| C | 2.84838700  | 0.20271700  | 0.61055200  |
| C | -2.98474800 | -0.76332200 | -2.47817800 |
| C | -4.22470100 | -0.39339900 | -2.98434400 |
| C | -4.54312900 | 0.95121500  | -2.79118200 |
| C | 3.54700300  | 1.25303300  | 1.21917300  |
| C | 4.78548800  | 0.88233200  | 1.72835600  |
| C | 5.10192900  | -0.46333000 | 1.53927200  |
| C | -5.73121300 | 1.66026100  | -3.18450200 |
| C | 6.28810900  | -1.17338300 | 1.93650500  |
| C | -5.89659400 | 3.03434200  | -2.90807800 |
| C | -7.04335600 | 3.70722100  | -3.29069000 |
| C | -8.06575400 | 3.03891800  | -3.96107000 |
| C | -7.92077300 | 1.68029700  | -4.24334400 |
| C | -6.77831400 | 1.00044000  | -3.86467200 |
| C | 6.45035000  | -2.54912000 | 1.66653100  |
| C | 7.59528400  | -3.22296500 | 2.05290100  |
| C | 8.61890000  | -2.55402200 | 2.72077700  |
| C | 8.47701100  | -1.19377000 | 2.99669900  |
| C | 7.33640200  | -0.51293500 | 2.61422600  |
| S | -3.24097000 | 1.75176900  | -1.95228400 |
| S | 3.79987600  | -1.26382400 | 0.70015200  |
| H | 1.19172600  | 2.32827100  | 0.35000200  |
| H | -0.98703600 | 2.36918400  | -0.70045200 |
| H | -0.62957200 | -1.83860700 | -1.60880100 |
| H | 1.54924800  | -1.87948900 | -0.55847000 |
| H | -2.59116800 | -1.76917900 | -2.54725100 |
| H | -4.88816300 | -1.08642000 | -3.48548000 |
| H | 3.15508400  | 2.25976600  | 1.28483700  |
| H | 5.44924100  | 1.57550400  | 2.22889700  |
| H | -5.11301900 | 3.57564200  | -2.38660500 |
| H | -7.14290800 | 4.76409200  | -3.06463700 |
| H | -8.96395900 | 3.56852300  | -4.26008300 |
| H | -8.70991300 | 1.14813300  | -4.76504200 |
| H | -6.69053300 | -0.05509700 | -4.09617200 |
| H | 5.66567900  | -3.09099600 | 1.14731100  |
| H | 7.69241200  | -4.28111400 | 1.83182500  |
| H | 9.51566700  | -3.08438700 | 3.02274700  |
| H | 9.26715900  | -0.66107600 | 3.51632400  |
| H | 7.25112100  | 0.54392000  | 2.84058900  |

5Sb compound

|   |             |             |             |
|---|-------------|-------------|-------------|
| C | -5.64942400 | -1.37058300 | 1.39951500  |
| C | -6.03378700 | -0.00060600 | 1.43797300  |
| C | -7.31321100 | 0.39104600  | 1.79843500  |
| C | -8.23964000 | -0.59417800 | 2.13016900  |
| C | -7.88573800 | -1.95316500 | 2.10011700  |
| C | -6.61441200 | -2.34720700 | 1.74222300  |
| C | -4.30941000 | -1.53880800 | 1.00849300  |
| C | -3.64052800 | -0.34072200 | 0.74194200  |
| S | -4.70890900 | 1.03751000  | 0.98420700  |
| C | -2.29149400 | -0.15826800 | 0.32930700  |
| C | -1.74285300 | 1.12947900  | 0.09222500  |
| C | -0.44288600 | 1.29605400  | -0.30431700 |
| C | 0.42061700  | 0.17722400  | -0.49718700 |
| C | -0.12806600 | -1.11053200 | -0.26024700 |
| C | -1.42807100 | -1.27711400 | 0.13617000  |
| C | 1.76991200  | 0.35973400  | -0.90894300 |
| S | 2.83979300  | -1.01820500 | -1.14619700 |
| C | 4.16457200  | 0.01990000  | -1.60027900 |
| C | 3.77900200  | 1.38964500  | -1.56584900 |
| C | 2.43818100  | 1.55770700  | -1.17753200 |
| C | 5.44493900  | -0.37156500 | -1.95758200 |
| C | 6.37111200  | 0.61361600  | -2.29015800 |
| C | 6.01599300  | 1.97236900  | -2.26417000 |
| C | 4.74372200  | 2.36622400  | -1.90944100 |
| H | -7.59011900 | 1.43961900  | 1.82270800  |
| H | -9.24611400 | -0.30634100 | 2.41486600  |
| H | -8.62679300 | -2.70081000 | 2.36318800  |
| H | -6.34531600 | -3.39844100 | 1.72038500  |
| H | -3.83567000 | -2.50814500 | 0.92069000  |
| H | -2.36696800 | 2.00767100  | 0.22774900  |
| H | -0.06891700 | 2.29904800  | -0.47290300 |
| H | 0.49605200  | -1.98872200 | -0.39576300 |
| H | -1.80195300 | -2.28009100 | 0.30505000  |
| H | 1.96334000  | 2.52683200  | -1.09340900 |
| H | 5.72276400  | -1.41996200 | -1.97879500 |
| H | 7.37832400  | 0.32592500  | -2.57238500 |
| H | 6.75686200  | 2.71998300  | -2.52785200 |
| H | 4.47369500  | 3.41727900  | -1.89070900 |

*5Sd compound*

|   |             |             |             |
|---|-------------|-------------|-------------|
| C | 1.28670800  | 0.05783400  | 0.61239500  |
| C | 2.66331000  | 0.05868100  | 0.99815000  |
| C | 3.53091000  | -0.24057000 | -0.08206900 |
| C | 1.10139400  | -0.24275100 | -0.76600100 |
| C | -0.14111200 | -0.30685600 | -1.39380500 |
| C | -1.28670800 | -0.05783400 | -0.61239500 |
| C | -1.10139400 | 0.24275100  | 0.76600100  |
| C | 0.14111200  | 0.30685600  | 1.39380500  |
| C | 3.24787000  | 0.30576200  | 2.25109400  |
| C | 4.63308100  | 0.24921000  | 2.38585900  |
| C | 5.46317500  | -0.04751700 | 1.30645300  |
| C | 4.90598300  | -0.29832000 | 0.04467800  |
| C | -2.66331000 | -0.05868100 | -0.99815000 |
| C | -3.53091000 | 0.24057000  | 0.08206900  |
| C | -3.24787000 | -0.30576200 | -2.25109400 |
| C | -4.63308100 | -0.24921000 | -2.38585900 |
| C | -5.46317500 | 0.04751700  | -1.30645300 |
| C | -4.90598300 | 0.29832000  | -0.04467900 |
| H | -0.22355700 | -0.54066200 | -2.44886900 |
| H | 0.22355700  | 0.54066200  | 2.44886900  |
| H | 2.62620000  | 0.53912500  | 3.10872800  |
| H | 5.07655900  | 0.44149700  | 3.35778000  |
| H | 6.53819400  | -0.08519000 | 1.43854200  |
| H | 5.53711900  | -0.53073100 | -0.80610700 |
| H | -2.62620000 | -0.53912500 | -3.10872800 |
| H | -5.07655900 | -0.44149700 | -3.35778000 |
| H | -6.53819400 | 0.08519000  | -1.43854200 |
| H | -5.53711900 | 0.53073100  | 0.80610700  |
| S | 2.61865200  | -0.51607400 | -1.55157200 |
| S | -2.61865200 | 0.51607400  | 1.55157200  |

## 6. References

- 1 I. P. Koskin, E. A. Mostovich, E. Benassi and M. S. Kazantsev, *J. Phys. Chem. C*, 2017, **121**, 23359–23369.
- 2 A. D. Becke, *J. Chem. Phys.*, 1993, **98**, 5648–5652.
- 3 A. D. McLean and G. S. Chandler, *J. Chem. Phys.*, 1980, **72**, 5639–5648.
- 4 R. Krishnan, J. S. Binkley, R. Seeger and J. A. Pople, *J. Chem. Phys.*, 1980, **72**, 650–654.
- 5 S. Grimme, S. Ehrlich and L. Goerigk, *J Comput Chem.*, 2011, **32**, 1456–1465.
- 6 F. Trani, G. Scalmani, G. Zheng, I. Carnimeo, M. J. Frisch and V. Barone, *J. Chem. Theory Comput.*, 2011, **7**, 3304–3313.
- 7 J. P. Perdew, M. Ernzerhof and K. Burke, *J. Chem. Phys.*, 1996, **105**, 9982–9985.
- 8 G. R. Hutchison, M. A. Ratner and T. J. Marks, *J. Am. Chem. Soc.*, 2005, **127**, 2339–2350.
- 9 T. Yanai, D. P. Tew and N. C. Handy, *Chem. Phys. Lett.*, 2004, **393**, 51–57.
- 10 R. Ditchfield, *J. Chem. Phys.*, 1971, **54**, 724–728.
- 11 E. Benassi, F. Egidi and V. Barone, *J. Phys. Chem. B*, 2015, **119**, 3155–3173.
- 12 D. J. Frisch, M. J.; Trucks, G. W.; Schlegel, H. B.; Scuseria, G. E.; Robb, M. A.; Cheeseman, J. R.; Scalmani, G.; Barone, V.; Mennucci, B.; Petersson, G. A.; Nakatsuji, H.; Caricato, M.; Li, X.; Hratchian, H. P.; Izmaylov, A. F.; Bloino, J.; Zheng, G.; Sonnenb, *Gaussian, Inc., Wallingford CT*.
